# Supplementary material for: The Interaction between 30b-5p miRNA and MBNL1 mRNA is Involved in Vascular Smooth Muscle Cell Differentiation in Patients with Coronary Atherosclerosis
Source: MDPI journal article supplement (doi:10.3390/ijms21010011), 2019-12-18
Supplement: s1 [file s1]

**Supplementary Table 2: The common predicted target genes obtained from the 3 databases and differentially expressed genes from microarray study were selected for further analysis.**

| Gene Symbol | Description                                                             |
|-------------|-------------------------------------------------------------------------|
| AASDHPPT    | Aminoadipate-Semialdehyde Dehydrogenase-Phosphopantetheinyl Transferase |
| ACADM       | Acyl-CoA Dehydrogenase Medium Chain                                     |
| ACSL3       | Acyl-CoA Synthetase Long Chain Family Member 3                          |
| ADAM22      | ADAM Metallopeptidase Domain 22                                         |
| ADAM28      | ADAM Metallopeptidase Domain 28                                         |
| ADAMTS5     | ADAM Metallopeptidase With Thrombospondin Type 1 Motif 5                |
| ADD3        | Adducin 3                                                               |
| AGFG2       | ArfGAP With FG Repeats 2                                                |
| AHCTF1      | AT-Hook Containing Transcription Factor 1                               |
| AKAP11      | A-Kinase Anchoring Protein 11                                           |
| AKAP6       | A-Kinase Anchoring Protein 6                                            |
| AKR1B10     | Aldo-Keto Reductase Family 1 Member B10                                 |
| AKTIP       | AKT Interacting Protein                                                 |
| ANKRD12     | Ankyrin Repeat Domain 12                                                |
| ANKRD17     | Ankyrin Repeat Domain 17                                                |
| API5        | Apoptosis Inhibitor 5                                                   |
| ARFIP1      | ADP Ribosylation Factor Interacting Protein 1                           |
| ARGLU1      | Arginine And Glutamate Rich 1                                           |
| ARHGAP21    | Rho GTPase Activating Protein 21                                        |
| ARID2       | AT-Rich Interaction Domain 2                                            |
| ARL2BP      | ADP Ribosylation Factor Like GTPase 2 Binding Protein                   |
| ARL5A       | ADP Ribosylation Factor Like GTPase 5A                                  |
| ARL5B       | ADP Ribosylation Factor Like GTPase 5B                                  |
| ASAH2B      | N-Acylsphingosine Amidohydrolase 2B                                     |
| ASXL2       | ASXL Transcriptional Regulator 2                                        |
| ATP1A2      | ATPase Na <sup>+</sup> /K <sup>+</sup> Transporting Subunit Alpha 2     |
| ATP2B3      | ATPase Plasma Membrane Ca <sup>2+</sup> Transporting 3                  |
| AXL         | AXL Receptor Tyrosine Kinase                                            |
| BAG4        | BCL2 Associated Athanogene 4                                            |
| BASP1       | Brain Abundant Membrane Attached Signal Protein 1                       |
| BECN1       | Beclin 1                                                                |
| BRCC3       | BRCA1/BRCA2-Containing Complex Subunit 3                                |
| BTBD10      | BTB Domain Containing 10                                                |
| BZW1        | Basic Leucine Zipper And W2 Domains 1                                   |
| C5orf51     | Chromosome 5 Open Reading Frame 51                                      |
| CACNB2      | Calcium Voltage-Gated Channel Auxiliary Subunit Beta 2                  |
| CADM2       | Cell Adhesion Molecule 2                                                |
| CAMSP2      | Calmodulin Regulated Spectrin Associated Protein Family Member 2        |
| CAMTA1      | Calmodulin Binding Transcription Activator 1                            |
| CAPRIN1     | Cell Cycle Associated Protein 1                                         |
| CBX3        | Chromobox 3                                                             |
| CCDC148     | Coiled-Coil Domain Containing 148                                       |
| CCDC68      | Coiled-Coil Domain Containing 68                                        |
| CCDC7       | Coiled-Coil Domain Containing 7                                         |
| CCNJ        | Cyclin J                                                                |
| CD55        | CD55 Molecule (Cromer Blood Group)                                      |
| CDC40       | Cell Division Cycle 40                                                  |
| CDH1        | Cadherin 1                                                              |
| CEP128      | Centrosomal Protein 128                                                 |
| CEP350      | Centrosomal Protein 350                                                 |
| CFHR3       | Complement Factor H Related 3                                           |
| CHN2        | Chimerin 2                                                              |
| CHSY1       | Chondroitin Sulfate Synthase 1                                          |
| CNOI7       | CCR4-NOT Transcription Complex Subunit 7                                |
| CNTNAP3     | Contactin Associated Protein Like 3                                     |
| COL11A1     | Collagen Type XI Alpha 1 Chain                                          |
| COL4A3BP    | Collagen Type IV Alpha 3 Binding Protein                                |
| COL5A2      | Collagen Type V Alpha 2 Chain                                           |
| CPEB3       | Cytoplasmic Polyadenylation Element Binding Protein 3                   |
| CREB1       | CAMP Responsive Element Binding Protein 1                               |
| CREBZF      | CREB/ATF BZIP Transcription Factor                                      |
| CRKL        | CRK Like Proto-Oncogene, Adaptor Protein                                |
| CTBP2       | C-Terminal Binding Protein 2                                            |
| CTDSP2      | CTD Small Phosphatase 2                                                 |
| CTNS        | Cystinosisin, Lysosomal Cystine Transporter                             |
| CTPS2       | CTP Synthase 2                                                          |
| CXXC4       | CXXC Finger Protein 4                                                   |
| CYLC2       | Cylicin 2                                                               |
| DCAF4L2     | DB1 And CUL4 Associated Factor 4 Like 2                                 |

|          |                                                                           |
|----------|---------------------------------------------------------------------------|
| DCUN1D1  | Defective In Cullin Neddylation 1 Domain Containing 1                     |
| DDX5     | DEAD-Box Helicase 5                                                       |
| DEXI     | Dexi Homolog                                                              |
| DHX36    | DEAH-Box Helicase 36                                                      |
| DICER1   | Dicer 1, Ribonuclease III                                                 |
| DLC1     | DLC1 Rho GTPase Activating Protein                                        |
| DLST     | Dihydrolipoamide S-Succinyltransferase                                    |
| DNASE2B  | Deoxyribonuclease 2 Beta                                                  |
| DOCK7    | Dedicator Of Cytokinesis 7                                                |
| DST      | Dystonin                                                                  |
| DYRK2    | Dual Specificity Tyrosine Phosphorylation Regulated Kinase 2              |
| EDEM3    | ER Degradation Enhancing Alpha-Mannosidase Like Protein 3                 |
| ELAVL3   | ELAV Like RNA Binding Protein 3                                           |
| ENAH     | ENAH, Actin Regulator                                                     |
| ENY2     | ENY2, Transcription And Export Complex 2 Subunit                          |
| EPDR1    | Ependymin Related 1                                                       |
| EPHA5    | EPH Receptor A5                                                           |
| EREG     | Epiregulin                                                                |
| ERG      | ERG, ETS Transcription Factor                                             |
| ETV1     | ETS Variant 1                                                             |
| FAIM     | Fas Apoptotic Inhibitory Molecule                                         |
| FAM107B  | Family With Sequence Similarity 107 Member B                              |
| FAM126B  | Family With Sequence Similarity 126 Member B                              |
| FAM160B1 | Family With Sequence Similarity 160 Member B1                             |
| FAM19A2  | amily With Sequence Similarity 19 Member A2, C-C Motif Chemokine Like     |
| FAM210B  | Family With Sequence Similarity 210 Member B                              |
| FAM218A  | Family With Sequence Similarity 218 Member A                              |
| FAM8A1   | Family With Sequence Similarity 8 Member A1                               |
| FBXW11   | F-Box And WD Repeat Domain Containing 11                                  |
| FBXW7    | F-Box And WD Repeat Domain Containing 7                                   |
| FOXO3    | Forkhead Box O3                                                           |
| FOXP1    | Forkhead Box P1                                                           |
| FSD1L    | Fibronectin Type III And SPRY Domain Containing 1 Like                    |
| GIT2     | GIT ArfGAP 2                                                              |
| GNAQ     | G Protein Subunit Alpha Q                                                 |
| GNPNAT1  | Glucosamine-Phosphate N-Acetyltransferase 1                               |
| GOLPH3L  | Golgi Phosphoprotein 3 Like                                               |
| GOSR1    | Golgi SNAP Receptor Complex Member 1                                      |
| GPALPP1  | GPALPP Motifs Containing 1                                                |
| GPD2     | Glycerol-3-Phosphate Dehydrogenase 2                                      |
| GYG2     | Glycogenin 2                                                              |
| GYPE     | Glycophorin E (MNS Blood Group)                                           |
| HIF1A    | Hypoxia Inducible Factor 1 Subunit Alpha                                  |
| HMG1     | High Mobility Group Nucleosome Binding Domain 1                           |
| HNRNPA1  | Heterogeneous Nuclear Ribonucleoprotein A1                                |
| HNRNPC   | Heterogeneous Nuclear Ribonucleoprotein C (C1/C2)                         |
| HNRNPU   | Heterogeneous Nuclear Ribonucleoprotein U                                 |
| HOMER1   | Homer Scaffold Protein 1                                                  |
| HOOK1    | Hook Microtubule Tethering Protein 1                                      |
| HSPA9    | Heat Shock Protein Family A (Hsp70) Member 9                              |
| HSPD1    | Heat Shock Protein Family D (Hsp60) Member 1                              |
| HTR1F    | 5-Hydroxytryptamine Receptor 1F                                           |
| IGF1     | Insulin Like Growth Factor 1                                              |
| IGF2BP3  | Insulin Like Growth Factor 2 MRNA Binding Protein 3                       |
| ITCH     | Itchy E3 Ubiquitin Protein Ligase                                         |
| ITFG2    | Integrin Alpha FG-GAP Repeat Containing 2                                 |
| ITGB1    | Integrin Subunit Beta 1                                                   |
| KCNMB2   | Potassium Calcium-Activated Channel Subfamily M Regulatory Beta Subunit 2 |
| KCTD16   | Potassium Channel Tetramerization Domain Containing 16                    |
| KCTD9    | Potassium Channel Tetramerization Domain Containing 9                     |
| KDM3A    | Lysine Demethylase 3A                                                     |
| KLF3     | Kruppel Like Factor 3                                                     |
| KLF4     | Kruppel Like Factor 4                                                     |
| KLHL31   | Kelch Like Family Member 31                                               |
| KLHL42   | Kelch Like Family Member 42                                               |
| KPNA4    | Karyopherin Subunit Alpha 4                                               |
| LAPTM4A  | Lysosomal Protein Transmembrane 4 Alpha                                   |
| LCOR     | Ligand Dependent Nuclear Receptor Corepressor                             |
| LDHC     | Lactate Dehydrogenase C                                                   |
| LEMD2    | LEM Domain Containing 2                                                   |
| LHFPL2   | LHFPL Tetraspan Subfamily Member 2                                        |
| LIMCH1   | LIM And Calponin Homology Domains 1                                       |
| LIMS1    | LIM Zinc Finger Domain Containing 1                                       |

|          |                                                                              |
|----------|------------------------------------------------------------------------------|
| LIPI     | Lipase I                                                                     |
| LMO3     | LIM Domain Only 3                                                            |
| LOX      | Lysyl Oxidase                                                                |
| LYRM7    | LYR Motif Containing 7                                                       |
| MAP1B    | Microtubule Associated Protein 1B                                            |
| MAP3K1   | Mitogen-Activated Protein Kinase Kinase Kinase 1                             |
| MAP3K2   | Mitogen-Activated Protein Kinase Kinase Kinase 2                             |
| MAPK8    | Mitogen-Activated Protein Kinase 8                                           |
| MASP1    | Mannan Binding Lectin Serine Peptidase 1                                     |
| MATR3    | Matrin 3                                                                     |
| MBNL1    | Muscleblind Like Splicing Regulator 1                                        |
| MEF2D    | Myocyte Enhancer Factor 2D                                                   |
| MIER1    | MIER1 Transcriptional Regulator                                              |
| MMP2     | Matrix Metallopeptidase 2                                                    |
| MOB3B    | MOB Kinase Activator 3B                                                      |
| MRO      | Maestro                                                                      |
| MTF2     | Metal Response Element Binding Transcription Factor 2                        |
| MTTP     | Microsomal Triglyceride Transfer Protein                                     |
| MXI1     | MAX Interactor 1, Dimerization Protein                                       |
| MYOCD    | Myocardin                                                                    |
| NAA50    | N(Alpha)-Acetyltransferase 50, NatE Catalytic Subunit                        |
| NAALADL2 | N-Acetylated Alpha-Linked Acidic Dipeptidase Like 2                          |
| NANP     | N-Acetylneuraminic Acid Phosphatase                                          |
| NAP1L1   | Nucleosome Assembly Protein 1 Like 1                                         |
| NCOA7    | Nuclear Receptor Coactivator 7                                               |
| NEDD1    | Neural Precursor Cell Expressed, Developmentally Down-Regulated 1            |
| NEK7     | NIMA Related Kinase 7                                                        |
| NET1     | Neuroepithelial Cell Transforming 1                                          |
| NFATC3   | Nuclear Factor Of Activated T Cells 3                                        |
| NFIB     | Nuclear Factor I B                                                           |
| NHLRC2   | NHL Repeat Containing 2                                                      |
| NLN      | Neurolysin                                                                   |
| NME9     | NME/NM23 Family Member 9                                                     |
| NOVA1    | NOVA Alternative Splicing Regulator 1                                        |
| NR1D2    | Nuclear Receptor Subfamily 1 Group D Member 2                                |
| OARD1    | O-Acyl-ADP-Ribose Deacylase 1                                                |
| P4HA1    | Prolyl 4-Hydroxylase Subunit Alpha 1                                         |
| PAG1     | Phosphoprotein Membrane Anchor With Glycosphingolipid Microdomains 1         |
| PAIP2    | Poly(A) Binding Protein Interacting Protein 2                                |
| PAPD5    | Terminal Nucleotidyltransferase 4B                                           |
| PAPPA    | Pappalysin 1                                                                 |
| PBX1     | PBX Homeobox 1                                                               |
| PBX2     | PBX Homeobox 2                                                               |
| PCDH17   | Protocadherin 17                                                             |
| PCMTD2   | Protein-L-Isoaspartate (D-Aspartate) O-Methyltransferase Domain Containing 2 |
| PDGFRA   | Platelet Derived Growth Factor Receptor Alpha                                |
| PFDN1    | Prefoldin Subunit 1                                                          |
| PFN2     | Profilin 2                                                                   |
| PKD2     | Polycystin 2, Transient Receptor Potential Cation Channel                    |
| PLAG1    | PLAG1 Zinc Finger                                                            |
| PLEKHA3  | Pleckstrin Homology Domain Containing A3                                     |
| PLEKHB2  | Pleckstrin Homology Domain Containing B2                                     |
| PNRC2    | Proline Rich Nuclear Receptor Coactivator 2                                  |
| POLR3G   | RNA Polymerase III Subunit G                                                 |
| PPHLN1   | Periphrin 1                                                                  |
| PPP1CB   | Protein Phosphatase 1 Catalytic Subunit Beta                                 |
| PPP4R2   | Protein Phosphatase 4 Regulatory Subunit 2                                   |
| PPTC7    | PTC7 Protein Phosphatase Homolog                                             |
| PRKAA1   | Protein Kinase AMP-Activated Catalytic Subunit Alpha 1                       |
| PRPF40A  | Pre-mRNA Processing Factor 40 Homolog A                                      |
| PRTG     | Protogenin                                                                   |
| PTCHD4   | Patched Domain Containing 4                                                  |
| PTP4A1   | Protein Tyrosine Phosphatase Type IVA, Member 1                              |
| RANBP2   | RAN Binding Protein 2                                                        |
| RBBP9    | RB Binding Protein 9, Serine Hydrolase                                       |
| RBFOX1   | RNA Binding Fox-1 Homolog 1                                                  |
| RBM12B   | RNA Binding Motif Protein 12B                                                |
| RDX      | Radixin                                                                      |
| RFX6     | Regulatory Factor X6                                                         |
| RIMKLB   | Ribosomal Modification Protein RimK Like Family Member B                     |
| RNA5H2C  | Ribonuclease H2 Subunit C                                                    |
| RNF122   | Ring Finger Protein 122                                                      |
| RNFT1    | Ring Finger Protein, Transmembrane 1                                         |

|           |                                                                                                                 |
|-----------|-----------------------------------------------------------------------------------------------------------------|
| RPS6KA6   | Ribosomal Protein S6 Kinase A6                                                                                  |
| RPS6KB1   | Ribosomal Protein S6 Kinase B1                                                                                  |
| RRAGD     | Ras Related GTP Binding D                                                                                       |
| RSBN1L    | Round Spermatid Basic Protein 1 Like                                                                            |
| RUFY2     | RUN And FYVE Domain Containing 2                                                                                |
| RUFY3     | RUN And FYVE Domain Containing 3                                                                                |
| SECISBP2L | SECIS Binding Protein 2 Like                                                                                    |
| SEMA3A    | Semaphorin 3A                                                                                                   |
| SERBP1    | SERPINE1 mRNA Binding Protein 1                                                                                 |
| SH3YL1    | SH3 And SYLF Domain Containing 1                                                                                |
| SKA2      | Spindle And Kinetochore Associated Complex Subunit 2                                                            |
| SKIL      | SKI Like Proto-Oncogene                                                                                         |
| SLC36A1   | Solute Carrier Family 36 Member 1                                                                               |
| SLC4A4    | Solute Carrier Family 4 Member 4                                                                                |
| SLC4A7    | Solute Carrier Family 4 Member 7                                                                                |
| SLC7A2    | Solute Carrier Family 7 Member 2                                                                                |
| SMAP1     | Small ArfGAP 1                                                                                                  |
| SMARCAD1  | SWI/SNF-Related, Matrix-Associated Actin-Dependent Regulator Of Chromatin, Subfamily A, Containing DEAD/H Box 1 |
| SNX10     | Sorting Nexin 10                                                                                                |
| SNX27     | Sorting Nexin Family Member 27                                                                                  |
| SNX30     | Sorting Nexin Family Member 30                                                                                  |
| SOCS3     | Suppressor Of Cytokine Signaling 3                                                                              |
| SOX13     | SRY-Box 13                                                                                                      |
| SPATA5    | Spermatogenesis Associated 5                                                                                    |
| SPATS2L   | Spermatogenesis Associated Serine Rich 2 Like                                                                   |
| SRSF10    | Serine And Arginine Rich Splicing Factor 10                                                                     |
| SSBP2     | Single Stranded DNA Binding Protein 2                                                                           |
| SSR3      | Signal Sequence Receptor Subunit 3                                                                              |
| STYX      | Serine/Threonine/Tyrosine Interacting Protein                                                                   |
| SYNCRIP   | Synaptotagmin Binding Cytoplasmic RNA Interacting Protein                                                       |
| TACR3     | Tachykinin Receptor 3                                                                                           |
| TBL1XR1   | Transducin Beta Like 1 X-Linked Receptor 1                                                                      |
| TCF4      | Transcription Factor 4                                                                                          |
| TDGF1     | Teratocarcinoma-Derived Growth Factor 1                                                                         |
| THRA      | Thyroid Hormone Receptor Alpha                                                                                  |
| THRB      | Thyroid Hormone Receptor Beta                                                                                   |
| TMEM106B  | Transmembrane Protein 106B                                                                                      |
| TMEM154   | Transmembrane Protein 154                                                                                       |
| TPM4      | Tropomyosin 4                                                                                                   |
| TPP1      | Tripeptidyl Peptidase 1                                                                                         |
| TRAPPC6B  | Trafficking Protein Particle Complex 6B                                                                         |
| TROVE2    | TROVE Domain Family Member 2                                                                                    |
| TSHZ3     | Teashirt Zinc Finger Homeobox 3                                                                                 |
| TTC14     | Tetratricopeptide Repeat Domain 14                                                                              |
| TTC39C    | Tetratricopeptide Repeat Domain 39C                                                                             |
| TTL5      | Tubulin Tyrosine Ligase Like 5                                                                                  |
| TWF1      | Twinfilin Actin Binding Protein 1                                                                               |
| UACA      | Uveal Autoantigen With Coiled-Coil Domains And Ankyrin Repeats                                                  |
| UBE2D1    | Ubiquitin Conjugating Enzyme E2 D1                                                                              |
| UBE2K     | Ubiquitin Conjugating Enzyme E2 K                                                                               |
| UBE3A     | Ubiquitin Protein Ligase E3A                                                                                    |
| UFM1      | Ubiquitin Fold Modifier 1                                                                                       |
| VAMP4     | Vesicle Associated Membrane Protein 4                                                                           |
| YWHAZ     | Tyrosine 3-Monooxygenase/Tryptophan 5-Monooxygenase Activation Protein Zeta                                     |
| YY1       | YY1 Transcription Factor                                                                                        |
| ZEB2      | Zinc Finger E-Box Binding Homeobox 2                                                                            |
| ZNF429    | Zinc Finger Protein 429                                                                                         |
| ZNF557    | Zinc Finger Protein 557                                                                                         |
| ZNF655    | Zinc Finger Protein 655                                                                                         |
| ZNF677    | Zinc Finger Protein 677                                                                                         |
| ZNF781    | Zinc Finger Protein 781                                                                                         |
