# Supplementary material for: The Interaction between 30b-5p miRNA and MBNL1 mRNA is Involved in Vascular Smooth Muscle Cell Differentiation in Patients with Coronary Atherosclerosis
Source: MDPI journal article supplement (doi:10.3390/ijms21010011), 2019-12-18
Supplement: s1 [file s1]

**Supplementary Table 1: Predictive analysis generated 3,648 common potential predicted target mRNAs, which were further cross-matched with our transcriptomic profiling data to identify potential associating miRNA-mRNA targets.**

| Gene Symbol | Description                                                              |
|-------------|--------------------------------------------------------------------------|
| A1CF        | APOBEC1 Complementation Factor                                           |
| AAK1        | AP2 Associated Kinase 1                                                  |
| AAMP        | Angio Associated Migratory Cell Protein                                  |
| AARD        | Alanine And Arginine Rich Domain Containing Protein                      |
| AASDHPPT    | Amino adipate-Semialdehyde Dehydrogenase-Phosphopantetheinyl Transferase |
| AATK        | Apoptosis Associated Tyrosine Kinase                                     |
| ABCA12      | ATP Binding Cassette Subfamily A Member 12                               |
| ABCB7       | ATP Binding Cassette Subfamily B Member 7                                |
| ABCB9       | ATP Binding Cassette Subfamily B Member 9                                |
| ABCC10      | ATP Binding Cassette Subfamily C Member 10                               |
| ABCC5       | ATP Binding Cassette Subfamily C Member 5                                |
| ABCC8       | ATP Binding Cassette Subfamily C Member 8                                |
| ABCC9       | ATP Binding Cassette Subfamily C Member 9                                |
| ABCD4       | ATP Binding Cassette Subfamily D Member 4                                |
| ABCE1       | ATP Binding Cassette Subfamily E Member 1                                |
| ABCG1       | ATP Binding Cassette Subfamily G Member 1                                |
| ABCG2       | ATP Binding Cassette Subfamily G Member 2 (Junior Blood Group)           |
| ABHD13      | Abhydrolase Domain Containing 13                                         |
| ABHD14B     | Abhydrolase Domain Containing 14B                                        |
| ABI2        | Abl Interactor 2                                                         |
| ABI3BP      | ABI Family Member 3 Binding Protein                                      |
| ABL1        | ABL Proto-Oncogene 1, Non-Receptor Tyrosine Kinase                       |
| ABL2        | ABL Proto-Oncogene 2, Non-Receptor Tyrosine Kinase                       |
| ABR         | ABR, RhoGEF And GTPase Activating Protein                                |
| ABRA        | Actin Binding Rho Activating Protein                                     |
| ABT1        | Activator Of Basal Transcription 1                                       |
| ACADM       | Acyl-CoA Dehydrogenase Medium Chain                                      |

|        |                                                          |
|--------|----------------------------------------------------------|
| ACADSB | Acyl-CoA Dehydrogenase Short/Branched Chain              |
| ACADVL | Acyl-CoA Dehydrogenase Very Long Chain                   |
| ACAP2  | ArfGAP With Coiled-Coil, Ankyrin Repeat And PH Domains 2 |
| ACBD5  | Acyl-CoA Binding Domain Containing 5                     |
| ACE2   | Angiotensin I Converting Enzyme 2                        |
| ACER2  | Alkaline Ceramidase 2                                    |
| ACER3  | Alkaline Ceramidase 3                                    |
| ACKR4  | Atypical Chemokine Receptor 4                            |
| ACOT11 | Acyl-CoA Thioesterase 11                                 |
| ACOT4  | Acyl-CoA Thioesterase 4                                  |
| ACP1   | Acid Phosphatase 1                                       |
| ACRV1  | Acrosomal Vesicle Protein 1                              |
| ACSL3  | Acyl-CoA Synthetase Long Chain Family Member 3           |
| ACSL4  | Acyl-CoA Synthetase Long Chain Family Member 4           |
| ACSL6  | Acyl-CoA Synthetase Long Chain Family Member 6           |
| ACTA1  | Actin, Alpha 1, Skeletal Muscle                          |
| ACTB   | Actin Beta                                               |
| ACTC1  | Actin, Alpha, Cardiac Muscle 1                           |
| ACTG2  | Actin, Gamma 2, Smooth Muscle, Enteric                   |
| ACTN1  | Actinin Alpha 1                                          |
| ACTR1A | ARP1 Actin Related Protein 1 Homolog A                   |
| ACTR3  | ARP3 Actin Related Protein 3 Homolog                     |
| ACVR1  | Activin A Receptor Type 1                                |
| ACVR1B | Activin A Receptor Type 1B                               |
| ACVR1C | Activin A Receptor Type 1C                               |
| ACVR2A | Activin A Receptor Type 2A                               |
| ACVR2B | Activin A Receptor Type 2B                               |
| ADA    | Adenosine Deaminase                                      |
| ADAM10 | ADAM Metallopeptidase Domain 10                          |
| ADAM12 | ADAM Metallopeptidase Domain 12                          |
| ADAM15 | ADAM Metallopeptidase Domain 15                          |
| ADAM17 | ADAM Metallopeptidase Domain 17                          |

|          |                                                           |
|----------|-----------------------------------------------------------|
| ADAM18   | ADAM Metallopeptidase Domain 18                           |
| ADAM22   | ADAM Metallopeptidase Domain 22                           |
| ADAM28   | ADAM Metallopeptidase Domain 28                           |
| ADAMTS1  | ADAM Metallopeptidase With Thrombospondin Type 1 Motif 1  |
| ADAMTS12 | ADAM Metallopeptidase With Thrombospondin Type 1 Motif 12 |
| ADAMTS14 | ADAM Metallopeptidase With Thrombospondin Type 1 Motif 14 |
| ADAMTS15 | ADAM Metallopeptidase With Thrombospondin Type 1 Motif 15 |
| ADAMTS3  | ADAM Metallopeptidase With Thrombospondin Type 1 Motif 3  |
| ADAMTS4  | ADAM Metallopeptidase With Thrombospondin Type 1 Motif 4  |
| ADAMTS5  | ADAM Metallopeptidase With Thrombospondin Type 1 Motif 5  |
| ADAMTS6  | ADAM Metallopeptidase With Thrombospondin Type 1 Motif 6  |
| ADAMTS8  | ADAM Metallopeptidase With Thrombospondin Type 1 Motif 8  |
| ADAMTS9  | ADAM Metallopeptidase With Thrombospondin Type 1 Motif 9  |
| ADAP2    | ArfGAP With Dual PH Domains 2                             |
| ADCY1    | Adenylate Cyclase 1                                       |
| ADCY9    | Adenylate Cyclase 9                                       |
| ADD3     | Adducin 3                                                 |
| ADHFE1   | Alcohol Dehydrogenase, Iron Containing 1                  |
| ADIPOR2  | Alcohol Dehydrogenase, Iron Containing 1                  |
| ADM      | Adrenomedullin                                            |
| ADNP     | Activity Dependent Neuroprotector Homeobox                |
| ADPGK    | ADP Dependent Glucokinase                                 |
| ADPRH    | ADP-Ribosylarginine Hydrolase                             |
| ADRA1D   | Adrenoceptor Alpha 1D                                     |
| ADRA2A   | Adrenoceptor Alpha 2A                                     |
| ADRB1    | Adrenoceptor Beta 1                                       |
| ADRB2    | Adrenoceptor Beta 2                                       |
| ADRB3    | Adrenoceptor Beta 3                                       |
| AEBP2    | AE Binding Protein 2                                      |
| AEN      | Apoptosis Enhancing Nuclease                              |
| AFAP1L2  | Actin Filament Associated Protein 1 Like 2                |
| AFF2     | AF4/FMR2 Family Member 2                                  |

|         |                                                     |
|---------|-----------------------------------------------------|
| AFF3    | AF4/FMR2 Family Member 3                            |
| AGBL2   | ATP/GTP Binding Protein Like 2                      |
| AGFG1   | ArfGAP With FG Repeats 1                            |
| AGFG2   | ArfGAP With FG Repeats 2                            |
| AGO1    | Argonaute 1, RISC Catalytic Component               |
| AGO2    | Argonaute 2, RISC Catalytic Component               |
| AGO3    | Argonaute 3, RISC Catalytic Component               |
| AGO4    | Argonaute 4, RISC Catalytic Component               |
| AGPAT5  | 1-Acylglycerol-3-Phosphate O-Acyltransferase 5      |
| AGTPBP1 | ATP/GTP Binding Protein 1                           |
| AHCTF1  | AT-Hook Containing Transcription Factor 1           |
| AHNAK   | AHNAK Nucleoprotein                                 |
| AHR     | Aryl Hydrocarbon Receptor                           |
| AHRR    | Aryl-Hydrocarbon Receptor Repressor                 |
| AIDA    | Axin Interactor, Dorsalization Associated           |
| AIFM1   | Apoptosis Inducing Factor Mitochondria Associated 1 |
| AK2     | Adenylate Kinase 2                                  |
| AKAP10  | A-Kinase Anchoring Protein 10                       |
| AKAP11  | A-Kinase Anchoring Protein 11                       |
| AKAP5   | A-Kinase Anchoring Protein 5                        |
| AKAP6   | A-Kinase Anchoring Protein 6                        |
| AKNA    | AT-Hook Transcription Factor                        |
| AKR1B10 | Aldo-Keto Reductase Family 1 Member B10             |
| AKR1C4  | Aldo-Keto Reductase Family 1 Member C4              |
| AKT3    | AKT Serine/Threonine Kinase 3                       |
| AKTIP   | AKT Interacting Protein                             |
| ALDH5A1 | Aldehyde Dehydrogenase 5 Family Member A1           |
| ALG10B  | ALG10B, Alpha-1,2-Glucosyltransferase               |
| ALG2    | ALG2, Alpha-1,3/1,6-Mannosyltransferase             |
| ALG8    | ALG8, Alpha-1,3-Glucosyltransferase                 |
| ALG9    | ALG9, Alpha-1,2-Mannosyltransferase                 |
| ALKBH1  | AlkB Homolog 1, Histone H2A Dioxygenase             |

|           |                                                                                                      |
|-----------|------------------------------------------------------------------------------------------------------|
| ALPK1     | Alpha Kinase 1                                                                                       |
| ALPK3     | Alpha Kinase 3                                                                                       |
| ALPP      | Alkaline Phosphatase, Placental                                                                      |
| AMACR     | Alpha-Methylacyl-CoA Racemase                                                                        |
| AMER2     | APC Membrane Recruitment Protein 2                                                                   |
| AMER3     | APC Membrane Recruitment Protein 3                                                                   |
| AMFR      | autocrine motility factor receptor                                                                   |
| AMMECR1   | Alport syndrome, mental retardation, midface hypoplasia and elliptocytosis chromosomal region gene 1 |
| AMMECR1L  | AMMECR1 like                                                                                         |
| AMOT      | angiomotin                                                                                           |
| AMOTL2    | angiomotin like 2                                                                                    |
| ANKFY1    | ankyrin repeat and FYVE domain containing 1                                                          |
| ANKIB1    | ankyrin repeat and IBR domain containing 1                                                           |
| ANKRA2    | ankyrin repeat family A member 2                                                                     |
| ANKRD12   | ankyrin repeat domain 12                                                                             |
| ANKRD13C  | ankyrin repeat domain 13C                                                                            |
| ANKRD17   | ankyrin repeat domain 17                                                                             |
| ANKRD20A4 | ankyrin repeat domain 20 family member A4                                                            |
| ANKRD23   | ankyrin repeat domain 23                                                                             |
| ANKRD28   | ankyrin repeat domain 28                                                                             |
| ANKRD29   | ankyrin repeat domain 29                                                                             |
| ANKRD34B  | ankyrin repeat domain 34B                                                                            |
| ANKRD39   | ankyrin repeat domain 39                                                                             |
| ANKRD49   | ankyrin repeat domain 49                                                                             |
| ANKRD52   | ankyrin repeat domain 52                                                                             |
| ANKRD6    | ankyrin repeat domain 6                                                                              |
| ANKS1B    | ankyrin repeat and sterile alpha motif domain containing 1B                                          |
| ANKS4B    | ankyrin repeat and sterile alpha motif domain containing 4B                                          |
| ANLN      | anillin actin binding protein                                                                        |
| ANO4      | anoctamin 4                                                                                          |
| ANO6      | anoctamin 6                                                                                          |
| ANP32B    | acidic nuclear phosphoprotein 32 family member B                                                     |

|          |                                                                                  |
|----------|----------------------------------------------------------------------------------|
| ANTXR1   | ANTXR cell adhesion molecule 1                                                   |
| ANXA13   | annexin A13                                                                      |
| ANXA2    | annexin A2                                                                       |
| ANXA4    | annexin A4                                                                       |
| AP1B1    | adaptor related protein complex 1 subunit beta 1                                 |
| AP1G1    | adaptor related protein complex 1 subunit gamma 1                                |
| AP1S1    | adaptor related protein complex 1 subunit sigma 1                                |
| AP1S2    | adaptor related protein complex 1 subunit sigma 2                                |
| AP2A1    | adaptor related protein complex 2 subunit alpha 1                                |
| AP3D1    | adaptor related protein complex 3 subunit delta 1                                |
| AP3M1    | adaptor related protein complex 3 subunit mu 1                                   |
| AP3S1    | adaptor related protein complex 3 subunit sigma 1                                |
| AP3S2    | adaptor related protein complex 3 subunit sigma 2                                |
| AP4E1    | adaptor related protein complex 4 subunit epsilon 1                              |
| APAF1    | apoptotic peptidase activating factor 1                                          |
| APBA1    | amyloid beta precursor protein binding family A member 1                         |
| APC      | APC, WNT signaling pathway regulator                                             |
| APCDD1   | APC down-regulated 1                                                             |
| API5     | apoptosis inhibitor 5                                                            |
| APOL6    | apolipoprotein L6                                                                |
| APOOL    | apolipoprotein O like                                                            |
| APPL1    | adaptor protein, phosphotyrosine interacting with PH domain and leucine zipper 1 |
| AQP5     | aquaporin 5                                                                      |
| ARAF     | A-Raf proto-oncogene, serine/threonine kinase                                    |
| ARAP2    | ArfGAP with RhoGAP domain, ankyrin repeat and PH domain 2                        |
| ARCN1    | archain 1                                                                        |
| ARF3     | ADP ribosylation factor 3                                                        |
| ARF4     | ADP ribosylation factor 4                                                        |
| ARFIP1   | ADP ribosylation factor interacting protein 1                                    |
| ARG2     | arginase 2                                                                       |
| ARGLU1   | arginine and glutamate rich 1                                                    |
| ARHGAP12 | Rho GTPase activating protein 12                                                 |

|          |                                                             |
|----------|-------------------------------------------------------------|
| ARHGAP20 | Rho GTPase activating protein 20                            |
| ARHGAP21 | Rho GTPase activating protein 21                            |
| ARHGAP26 | Rho GTPase activating protein 26                            |
| ARHGAP28 | Rho GTPase activating protein 28                            |
| ARHGAP29 | Rho GTPase activating protein 29                            |
| ARHGAP32 | Rho GTPase activating protein 32                            |
| ARHGAP6  | Rho GTPase activating protein 6                             |
| ARHGAP8  | Rho GTPase activating protein 8                             |
| ARHGEF10 | Rho guanine nucleotide exchange factor 10                   |
| ARHGEF15 | Rho guanine nucleotide exchange factor 15                   |
| ARHGEF18 | Rho/Rac guanine nucleotide exchange factor 18               |
| ARHGEF28 | Rho guanine nucleotide exchange factor 28                   |
| ARHGEF38 | Rho guanine nucleotide exchange factor 38                   |
| ARHGEF40 | Rho guanine nucleotide exchange factor 40                   |
| ARID1A   | AT-rich interaction domain 1A                               |
| ARID2    | AT-rich interaction domain 2                                |
| ARID3A   | AT-rich interaction domain 3A                               |
| ARID3B   | AT-rich interaction domain 3B                               |
| ARID4A   | AT-rich interaction domain 4A                               |
| ARID4B   | AT-rich interaction domain 4B                               |
| ARID5B   | AT-rich interaction domain 5B                               |
| ARIH1    | ariadne RBR E3 ubiquitin protein ligase 1                   |
| ARL10    | ADP ribosylation factor like GTPase 10                      |
| ARL15    | ADP ribosylation factor like GTPase 15                      |
| ARL2BP   | ADP ribosylation factor like GTPase 2 binding protein       |
| ARL3     | ADP ribosylation factor like GTPase 3                       |
| ARL4A    | ADP ribosylation factor like GTPase 4A                      |
| ARL4C    | ADP ribosylation factor like GTPase 4C                      |
| ARL4D    | ADP ribosylation factor like GTPase 4D                      |
| ARL5A    | ADP ribosylation factor like GTPase 5A                      |
| ARL5B    | ADP ribosylation factor like GTPase 5B                      |
| ARL6IP6  | ADP ribosylation factor like GTPase 6 interacting protein 6 |

|         |                                                        |
|---------|--------------------------------------------------------|
| ARMC8   | armadillo repeat containing 8                          |
| ARMCX2  | armadillo repeat containing X-linked 2                 |
| ARMS2   | age-related maculopathy susceptibility 2               |
| ARPC3   | actin related protein 2/3 complex subunit 3            |
| ARPC5   | actin related protein 2/3 complex subunit 5            |
| ARPC5L  | actin related protein 2/3 complex subunit 5 like       |
| ARPP19  | cAMP regulated phosphoprotein 19                       |
| ARPP21  | cAMP regulated phosphoprotein 21                       |
| ARRDC4  | arrestin domain containing 4                           |
| ARSB    | arylsulfatase B                                        |
| ART3    | ADP-ribosyltransferase 3                               |
| ASAH2   | N-acylsphingosine amidohydrolase 2                     |
| ASAH2B  | N-acylsphingosine amidohydrolase 2B                    |
| ASAP1   | ArfGAP with SH3 domain, ankyrin repeat and PH domain 1 |
| ASAP2   | ArfGAP with SH3 domain, ankyrin repeat and PH domain 2 |
| ASB2    | ankyrin repeat and SOCS box containing 2               |
| ASF1A   | anti-silencing function 1A histone chaperone           |
| ASH1L   | ASH1 like histone lysine methyltransferase             |
| ASIC1   | acid sensing ion channel subunit 1                     |
| ASPH    | aspartate beta-hydroxylase                             |
| ASPN    | asporin                                                |
| ASXL2   | ASXL transcriptional regulator 2                       |
| ATAD2   | ATPase family, AAA domain containing 2                 |
| ATAD2B  | ATPase family, AAA domain containing 2B                |
| ATE1    | arginyltransferase 1                                   |
| ATF1    | activating transcription factor 1                      |
| ATF2    | activating transcription factor 2                      |
| ATG13   | autophagy related 13                                   |
| ATG16L1 | autophagy related 16 like 1                            |
| ATG2B   | autophagy related 2B                                   |
| ATG5    | autophagy related 5                                    |
| ATG9A   | autophagy related 9A                                   |



|          |                                                               |
|----------|---------------------------------------------------------------|
| ATL2     | atlastin GTPase 2                                             |
| ATM      | ATM serine/threonine kinase                                   |
| ATP10B   | ATPase phospholipid transporting 10B (putative)               |
| ATP10D   | ATPase phospholipid transporting 10D (putative)               |
| ATP11B   | ATPase phospholipid transporting 11B (putative)               |
| ATP11C   | ATPase phospholipid transporting 11C                          |
| ATP12A   | ATPase H+/K+ transporting non-gastric alpha2 subunit          |
| ATP13A3  | ATPase 13A3                                                   |
| ATP1A2   | ATPase Na+/K+ transporting subunit alpha 2                    |
| ATP2A2   | ATPase sarcoplasmic/endoplasmic reticulum Ca2+ transporting 2 |
| ATP2B1   | ATPase plasma membrane Ca2+ transporting 1                    |
| ATP2B2   | ATPase plasma membrane Ca2+ transporting 2                    |
| ATP2B3   | ATPase plasma membrane Ca2+ transporting 3                    |
| ATP2C1   | ATPase secretory pathway Ca2+ transporting 1                  |
| ATP6V0A2 | ATPase H+ transporting V0 subunit a2                          |
| ATP6V1A  | ATPase H+ transporting V1 subunit A                           |
| ATP6V1B2 | ATPase H+ transporting V1 subunit B2                          |
| ATP6V1C1 | ATPase H+ transporting V1 subunit C1                          |
| ATP6V1G1 | ATPase H+ transporting V1 subunit G1                          |
| ATP8A1   | ATPase phospholipid transporting 8A1                          |
| ATP8A2   | ATPase phospholipid transporting 8A2                          |
| ATP8B4   | ATPase phospholipid transporting 8B4 (putative)               |
| ATP9A    | ATPase phospholipid transporting 9A (putative)                |
| ATPAF1   | ATP synthase mitochondrial F1 complex assembly factor 1       |
| ATRNL1   | attractin like 1                                              |
| ATRX     | ATRX, chromatin remodeler                                     |
| ATXN1    | ataxin 1                                                      |
| ATXN1L   | ataxin 1 like                                                 |
| ATXN7    | ataxin 7                                                      |
| ATXN7L1  | ataxin 7 like 1                                               |
| ATXN7L2  | ataxin 7 like 2                                               |
| ATXN7L3  | ataxin 7 like 3                                               |

|          |                                                               |
|----------|---------------------------------------------------------------|
| ATXN7L3B | ataxin 7 like 3B                                              |
| AVEN     | apoptosis and caspase activation inhibitor                    |
| AXDND1   | axonemal dynein light chain domain containing 1               |
| AXL      | AXL receptor tyrosine kinase                                  |
| AZIN1    | antizyme inhibitor 1                                          |
| B3GALT5  | beta-1,3-galactosyltransferase 5                              |
| B3GAT1   | beta-1,3-glucuronyltransferase 1                              |
| B3GAT3   | beta-1,3-glucuronyltransferase 3                              |
| B3GNT2   | UDP-GlcNAc:betaGal beta-1,3-N-acetylglucosaminyltransferase 2 |
| B3GNT5   | UDP-GlcNAc:betaGal beta-1,3-N-acetylglucosaminyltransferase 5 |
| B3GNT7   | UDP-GlcNAc:betaGal beta-1,3-N-acetylglucosaminyltransferase 7 |
| B4GALT1  | beta-1,4-galactosyltransferase 1                              |
| B4GALT4  | beta-1,4-galactosyltransferase 4                              |
| B4GALT6  | beta-1,4-galactosyltransferase 6                              |
| BAAT     | bile acid-CoA:amino acid N-acyltransferase                    |
| BACE2    | beta-secretase 2                                              |
| BACH1    | BTB domain and CNC homolog 1                                  |
| BACH2    | BTB domain and CNC homolog 2                                  |
| BAG4     | BCL2 associated athanogene 4                                  |
| BAG5     | BCL2 associated athanogene 5                                  |
| BAG6     | BCL2 associated athanogene 6                                  |
| BAHD1    | bromo adjacent homology domain containing 1                   |
| BAK1     | BCL2 antagonist/killer 1                                      |
| BAP1     | BRCA1 associated protein 1                                    |
| BASP1    | brain abundant membrane attached signal protein 1             |
| BAZ2B    | bromodomain adjacent to zinc finger domain 2B                 |
| BBIP1    | BBSome interacting protein 1                                  |
| BBX      | BBX, HMG-box containing                                       |
| BCAP29   | B cell receptor associated protein 29                         |
| BCAT1    | branched chain amino acid transaminase 1                      |
| BCCIP    | BRCA2 and CDKN1A interacting protein                          |
| BCL10    | B cell CLL/lymphoma 10                                        |

|         |                                                                                      |
|---------|--------------------------------------------------------------------------------------|
| BCL11B  | B cell CLL/lymphoma 11B                                                              |
| BCL2    | BCL2, apoptosis regulator                                                            |
| BCL2L1  | BCL2 like 1                                                                          |
| BCL2L11 | BCL2 like 11                                                                         |
| BCL2L15 | BCL2 like 15                                                                         |
| BCL6    | B cell CLL/lymphoma 6                                                                |
| BCL7A   | BCL tumor suppressor 7A                                                              |
| BCL7B   | BCL tumor suppressor 7B                                                              |
| BCO2    | beta-carotene oxygenase 2                                                            |
| BCOR    | BCL6 corepressor                                                                     |
| BCR     | BCR, RhoGEF and GTPase activating protein                                            |
| BDNF    | brain derived neurotrophic factor                                                    |
| BDP1    | B double prime 1, subunit of RNA polymerase III transcription initiation factor IIIB |
| BECN1   | beclin 1                                                                             |
| BEGAIN  | brain enriched guanylate kinase associated                                           |
| BEND4   | BEN domain containing 4                                                              |
| BEND7   | BEN domain containing 7                                                              |
| BEST4   | bestrophin 4                                                                         |
| BET1    | Bet1 golgi vesicular membrane trafficking protein                                    |
| BET1L   | Bet1 golgi vesicular membrane trafficking protein like                               |
| BHLHE22 | basic helix-loop-helix family member e22                                             |
| BHLHE40 | basic helix-loop-helix family member e40                                             |
| BHLHE41 | basic helix-loop-helix family member e41                                             |
| BICC1   | BicC family RNA binding protein 1                                                    |
| BID     | BH3 interacting domain death agonist                                                 |
| BIN3    | bridging integrator 3                                                                |
| BLOC1S2 | biogenesis of lysosomal organelles complex 1 subunit 2                               |
| BNC1    | basonuclin 1                                                                         |
| BNC2    | basonuclin 2                                                                         |
| BNIP2   | BCL2 interacting protein 2                                                           |
| BOC     | BOC cell adhesion associated, oncogene regulated                                     |
| BOD1    | biorientation of chromosomes in cell division 1                                      |

|           |                                                                  |
|-----------|------------------------------------------------------------------|
| BOD1L2    | biorientation of chromosomes in cell division 1 like 2           |
| BOLL      | boule homolog, RNA binding protein                               |
| BPY2      | basic charge Y-linked 2                                          |
| BRCA2     | BRCA2, DNA repair associated                                     |
| BRCC3     | BRCA1/BRCA2-containing complex subunit 3                         |
| BRD3      | bromodomain containing 3                                         |
| BRF2      | BRF2, RNA polymerase III transcription initiation factor subunit |
| BRI3BP    | BRI3 binding protein                                             |
| BRWD1     | bromodomain and WD repeat domain containing 1                    |
| BRWD3     | bromodomain and WD repeat domain containing 3                    |
| BSCL2     | BSCL2, seipin lipid droplet biogenesis associated                |
| BSDC1     | BSD domain containing 1                                          |
| BSN       | bassoon presynaptic cytomatrix protein                           |
| BSND      | barttin CLCNK type accessory beta subunit                        |
| BTAF1     | B-TFIID TATA-box binding protein associated factor 1             |
| BTBD10    | BTB domain containing 10                                         |
| BTBD3     | BTB domain containing 3                                          |
| BTBD7     | BTB domain containing 7                                          |
| BTBD9     | BTB domain containing 9                                          |
| BTF3L4    | basic transcription factor 3 like 4                              |
| BTG2      | BTG anti-proliferation factor 2                                  |
| BTLA      | B and T lymphocyte associated                                    |
| BUB3      | BUB3, mitotic checkpoint protein                                 |
| BZW1      | basic leucine zipper and W2 domains 1                            |
| BZW2      | basic leucine zipper and W2 domains 2                            |
| C10orf55  | chromosome 10 open reading frame 55                              |
| C11orf21  | chromosome 11 open reading frame 21                              |
| C11orf87  | chromosome 11 open reading frame 87                              |
| C12orf4   | chromosome 12 open reading frame 4                               |
| C12orf49  | chromosome 12 open reading frame 49                              |
| C14orf178 | chromosome 14 open reading frame 178                             |
| C14orf28  | chromosome 14 open reading frame 28                              |

|           |                                                                                    |
|-----------|------------------------------------------------------------------------------------|
| C14orf39  | chromosome 14 open reading frame 39                                                |
| C15orf39  | chromosome 15 open reading frame 39                                                |
| C15orf41  | chromosome 15 open reading frame 41                                                |
| C16orf72  | chromosome 16 open reading frame 72                                                |
| C16orf87  | chromosome 16 open reading frame 87                                                |
| C18orf21  | chromosome 18 open reading frame 21                                                |
| C18orf63  | chromosome 18 open reading frame 63                                                |
| C19orf12  | chromosome 19 open reading frame 12                                                |
| C1GALT1   | core 1 synthase, glycoprotein-N-acetylgalactosamine 3-beta-galactosyltransferase 1 |
| C1orf112  | chromosome 1 open reading frame 112                                                |
| C1orf159  | chromosome 1 open reading frame 159                                                |
| C1orf174  | chromosome 1 open reading frame 174                                                |
| C1orf21   | chromosome 1 open reading frame 21                                                 |
| C1orf226  | chromosome 1 open reading frame 226                                                |
| C1QTNF5   | C1q and TNF related 5                                                              |
| C1QTNF9   | C1q and TNF related 9                                                              |
| C1S       | complement C1s                                                                     |
| C20orf194 | chromosome 20 open reading frame 194                                               |
| C21orf91  | chromosome 21 open reading frame 91                                                |
| C22orf42  | chromosome 22 open reading frame 42                                                |
| C2CD2     | C2 calcium dependent domain containing 2                                           |
| C2CD5     | C2 calcium dependent domain containing 5                                           |
| C2orf69   | chromosome 2 open reading frame 69                                                 |
| C2orf71   |                                                                                    |
| C2orf88   | chromosome 2 open reading frame 88                                                 |
| C2orf91   | chromosome 2 open reading frame 91                                                 |
| C3orf38   | chromosome 3 open reading frame 38                                                 |
| C3orf52   | chromosome 3 open reading frame 52                                                 |
| C3orf58   | chromosome 3 open reading frame 58                                                 |
| C3orf80   | chromosome 3 open reading frame 80                                                 |
| C4orf19   | chromosome 4 open reading frame 19                                                 |
| C4orf3    | chromosome 4 open reading frame 3                                                  |

|          |                                                        |
|----------|--------------------------------------------------------|
| C5orf24  | chromosome 5 open reading frame 24                     |
| C5orf51  | chromosome 5 open reading frame 51                     |
| C6orf120 | chromosome 6 open reading frame 120                    |
| C6orf201 | chromosome 6 open reading frame 201                    |
| C6orf223 | chromosome 6 open reading frame 223                    |
| C7orf31  | chromosome 7 open reading frame 31                     |
| C7orf43  | chromosome 7 open reading frame 43                     |
| C8orf37  | chromosome 8 open reading frame 37                     |
| C8orf44  | chromosome 8 open reading frame 44                     |
| C8orf58  | chromosome 8 open reading frame 58                     |
| C9orf152 | chromosome 9 open reading frame 152                    |
| C9orf153 | chromosome 9 open reading frame 153                    |
| C9orf40  | chromosome 9 open reading frame 40                     |
| C9orf72  | chromosome 9 open reading frame 72                     |
| C9orf85  | chromosome 9 open reading frame 85                     |
| CA12     | carbonic anhydrase 12                                  |
| CA2      | carbonic anhydrase 2                                   |
| CA6      | carbonic anhydrase 6                                   |
| CAAP1    | caspase activity and apoptosis inhibitor 1             |
| CABLES1  | Cdk5 and Abl enzyme substrate 1                        |
| CACHD1   | cache domain containing 1                              |
| CACNA1C  | calcium voltage-gated channel subunit alpha1 C         |
| CACNA1D  | calcium voltage-gated channel subunit alpha1 D         |
| CACNA1I  | calcium voltage-gated channel subunit alpha1 I         |
| CACNB2   | calcium voltage-gated channel auxiliary subunit beta 2 |
| CACNB4   | calcium voltage-gated channel auxiliary subunit beta 4 |
| CACUL1   | CDK2 associated cullin domain 1                        |
| CADM2    | cell adhesion molecule 2                               |
| CADPS    | calcium dependent secretion activator                  |
| CALB2    | calbindin 2                                            |
| CALCOCO2 | calcium binding and coiled-coil domain 2               |
| CALCR    | calcitonin receptor                                    |

|          |                                                                  |
|----------|------------------------------------------------------------------|
| CALM1    | calmodulin 1                                                     |
| CALM3    | calmodulin 3                                                     |
| CALN1    | calneuron 1                                                      |
| CAMK1    | calcium/calmodulin dependent protein kinase I                    |
| CAMK2D   | calcium/calmodulin dependent protein kinase II delta             |
| CAMK2N1  | calcium/calmodulin dependent protein kinase II inhibitor 1       |
| CAMK2N2  | calcium/calmodulin dependent protein kinase II inhibitor 2       |
| CAMK4    | calcium/calmodulin dependent protein kinase IV                   |
| CAMSAP2  | calmodulin regulated spectrin associated protein family member 2 |
| CAMTA1   | calmodulin binding transcription activator 1                     |
| CAND1    | cullin associated and neddylation dissociated 1                  |
| CAP1     | cyclase associated actin cytoskeleton regulatory protein 1       |
| CAPN3    | calpain 3                                                        |
| CAPN5    | calpain 5                                                        |
| CAPN7    | calpain 7                                                        |
| CAPRIN1  | cell cycle associated protein 1                                  |
| CAPRIN2  | caprin family member 2                                           |
| CAPZA1   | capping actin protein of muscle Z-line subunit alpha 1           |
| CARF     | calcium responsive transcription factor                          |
| CARS     | cysteinyl-tRNA synthetase                                        |
| CASC3    | CASC3, exon junction complex subunit                             |
| CASKIN1  | CASK interacting protein 1                                       |
| CASP3    | caspase 3                                                        |
| CAST     | calpastatin                                                      |
| CASZ1    | castor zinc finger 1                                             |
| CAT      | catalase                                                         |
| CATSPERG | cation channel sperm associated auxiliary subunit gamma          |
| CBFA2T3  | CBFA2/RUNX1 translocation partner 3                              |
| CBFB     | core-binding factor subunit beta                                 |
| CBL      | Cbl proto-oncogene                                               |
| CBLB     | Cbl proto-oncogene B                                             |
| CBR4     | carbonyl reductase 4                                             |

|           |                                                           |
|-----------|-----------------------------------------------------------|
| CBX2      | chromobox 2                                               |
| CBX3      | chromobox 3                                               |
| CBX5      | chromobox 5                                               |
| CC2D1A    | coiled-coil and C2 domain containing 1A                   |
| CCDC117   | coiled-coil domain containing 117                         |
| CCDC120   | coiled-coil domain containing 120                         |
| CCDC14    | coiled-coil domain containing 14                          |
| CCDC141   | coiled-coil domain containing 141                         |
| CCDC144NL | coiled-coil domain containing 144 family, N-terminal like |
| CCDC146   | coiled-coil domain containing 146                         |
| CCDC148   | coiled-coil domain containing 148                         |
| CCDC149   | coiled-coil domain containing 149                         |
| CCDC28A   | coiled-coil domain containing 28A                         |
| CCDC38    | coiled-coil domain containing 38                          |
| CCDC43    | coiled-coil domain containing 43                          |
| CCDC50    | coiled-coil domain containing 50                          |
| CCDC6     | coiled-coil domain containing 6                           |
| CCDC68    | coiled-coil domain containing 68                          |
| CCDC7     | coiled-coil domain containing 7                           |
| CCDC71L   | coiled-coil domain containing 71 like                     |
| CCDC82    | coiled-coil domain containing 82                          |
| CCDC93    | coiled-coil domain containing 93                          |
| CCDC97    | coiled-coil domain containing 97                          |
| CCL19     | C-C motif chemokine ligand 19                             |
| CCL7      | C-C motif chemokine ligand 7                              |
| CCNA1     | cyclin A1                                                 |
| CCNA2     | cyclin A2                                                 |
| CCNC      | cyclin C                                                  |
| CCND1     | cyclin D1                                                 |
| CCND2     | cyclin D2                                                 |
| CCNE2     | cyclin E2                                                 |
| CCNF      | cyclin F                                                  |



|          |                                                 |
|----------|-------------------------------------------------|
| CCNG1    | cyclin G1                                       |
| CCNJ     | cyclin J                                        |
| CCNJL    | cyclin J like                                   |
| CCNK     | cyclin K                                        |
| CCNT2    | cyclin T2                                       |
| CCNY     | cyclin Y                                        |
| CCNYL1   | cyclin Y like 1                                 |
| CCR7     | C-C motif chemokine receptor 7                  |
| CCSAP    | centriole, cilia and spindle associated protein |
| CCSER1   | coiled-coil serine rich protein 1               |
| CCSER2   | coiled-coil serine rich protein 2               |
| CD200    | CD200 molecule                                  |
| CD200R1  | CD200 receptor 1                                |
| CD276    | CD276 molecule                                  |
| CD28     | CD28 molecule                                   |
| CD300LG  | CD300 molecule like family member g             |
| CD55     | CD55 molecule (Cromer blood group)              |
| CD59     | CD59 molecule (CD59 blood group)                |
| CD80     | CD80 molecule                                   |
| CD86     | CD86 molecule                                   |
| CDC14B   | cell division cycle 14B                         |
| CDC25A   | cell division cycle 25A                         |
| CDC34    | cell division cycle 34                          |
| CDC37L1  | cell division cycle 37 like 1                   |
| CDC40    | cell division cycle 40                          |
| CDC42    | cell division cycle 42                          |
| CDC42BPA | CDC42 binding protein kinase alpha              |
| CDC42SE1 | CDC42 small effector 1                          |
| CDC6     | cell division cycle 6                           |
| CDCA5    | cell division cycle associated 5                |
| CDCA7    | cell division cycle associated 7                |
| CDH1     | cadherin 1                                      |

|         |                                                           |
|---------|-----------------------------------------------------------|
| CDH11   | cadherin 11                                               |
| CDH13   | cadherin 13                                               |
| CDH20   | cadherin 20                                               |
| CDH26   | cadherin 26                                               |
| CDH8    | cadherin 8                                                |
| CDK14   | cyclin dependent kinase 14                                |
| CDK15   | cyclin dependent kinase 15                                |
| CDK17   | cyclin dependent kinase 17                                |
| CDK19   | cyclin dependent kinase 19                                |
| CDK2    | cyclin dependent kinase 2                                 |
| CDK2AP1 | cyclin dependent kinase 2 associated protein 1            |
| CDK6    | cyclin dependent kinase 6                                 |
| CDK8    | cyclin dependent kinase 8                                 |
| CDKN1A  | cyclin dependent kinase inhibitor 1A                      |
| CDON    | cell adhesion associated, oncogene regulated              |
| CDV3    | CDV3 homolog                                              |
| CDX2    | caudal type homeobox 2                                    |
| CDYL    | chromodomain Y like                                       |
| CEACAM1 | carcinoembryonic antigen related cell adhesion molecule 1 |
| CEBPG   | CCAAT enhancer binding protein gamma                      |
| CELF1   | CUGBP Elav-like family member 1                           |
| CELF3   | CUGBP Elav-like family member 3                           |
| CELF6   | CUGBP Elav-like family member 6                           |
| CELSR1  | cadherin EGF LAG seven-pass G-type receptor 1             |
| CENPQ   | centromere protein Q                                      |
| CEP120  | centrosomal protein 120                                   |
| CEP128  | centrosomal protein 128                                   |
| CEP135  | centrosomal protein 135                                   |
| CEP164  | centrosomal protein 164                                   |
| CEP170B | centrosomal protein 170B                                  |
| CEP350  | centrosomal protein 350                                   |
| CEP41   | centrosomal protein 41                                    |

|         |                                                            |
|---------|------------------------------------------------------------|
| CEP44   | centrosomal protein 44                                     |
| CEP76   | centrosomal protein 76                                     |
| CEP85L  | centrosomal protein 85 like                                |
| CEP95   | centrosomal protein 95                                     |
| CERCAM  | cerebral endothelial cell adhesion molecule                |
| CERS6   | ceramide synthase 6                                        |
| CFHR3   | complement factor H related 3                              |
| CFL2    | cofilin 2                                                  |
| CH25H   | cholesterol 25-hydroxylase                                 |
| CHAC1   | ChaC glutathione specific gamma-glutamylcyclotransferase 1 |
| CHAC2   | ChaC cation transport regulator homolog 2                  |
| CHCHD3  | coiled-coil-helix-coiled-coil-helix domain containing 3    |
| CHD1    | chromodomain helicase DNA binding protein 1                |
| CHD3    | chromodomain helicase DNA binding protein 3                |
| CHD4    | chromodomain helicase DNA binding protein 4                |
| CHD7    | chromodomain helicase DNA binding protein 7                |
| CHD9    | chromodomain helicase DNA binding protein 9                |
| CHEK1   | checkpoint kinase 1                                        |
| CHI3L1  | chitinase 3 like 1                                         |
| CHIA    | chitinase, acidic                                          |
| CHIC1   | cysteine rich hydrophobic domain 1                         |
| CHL1    | cell adhesion molecule L1 like                             |
| CHN2    | chimerin 2                                                 |
| CHORDC1 | cysteine and histidine rich domain containing 1            |
| CHRD1   | chordin like 1                                             |
| CHRM2   | cholinergic receptor muscarinic 2                          |
| CHRNA6  | cholinergic receptor nicotinic alpha 6 subunit             |
| CHRNA7  | cholinergic receptor nicotinic alpha 7 subunit             |
| CHST1   | carbohydrate sulfotransferase 1                            |
| CHST11  | carbohydrate sulfotransferase 11                           |
| CHST12  | carbohydrate sulfotransferase 12                           |
| CHST2   | carbohydrate sulfotransferase 2                            |

|         |                                                                                 |
|---------|---------------------------------------------------------------------------------|
| CHST3   | carbohydrate sulfotransferase 3                                                 |
| CHST6   | carbohydrate sulfotransferase 6                                                 |
| CHSY1   | chondroitin sulfate synthase 1                                                  |
| CHSY3   | chondroitin sulfate synthase 3                                                  |
| CILP    | cartilage intermediate layer protein                                            |
| CISH    | cytokine inducible SH2 containing protein                                       |
| CITED2  | Cbp/p300 interacting transactivator with Glu/Asp rich carboxy-terminal domain 2 |
| CKAP4   | cytoskeleton associated protein 4                                               |
| CLASP1  | cytoplasmic linker associated protein 1                                         |
| CLCA2   | chloride channel accessory 2                                                    |
| CLCC1   | chloride channel CLIC like 1                                                    |
| CLCN3   | chloride voltage-gated channel 3                                                |
| CLCN5   | chloride voltage-gated channel 5                                                |
| CLDN1   | claudin 1                                                                       |
| CLDN12  | claudin 12                                                                      |
| CLDN16  | claudin 16                                                                      |
| CLEC7A  | C-type lectin domain containing 7A                                              |
| CLIC4   | chloride intracellular channel 4                                                |
| CLIP4   | CAP-Gly domain containing linker protein family member 4                        |
| CLLU1   | chronic lymphocytic leukemia up-regulated 1                                     |
| CLN5    | CLN5, intracellular trafficking protein                                         |
| CLN8    | CLN8, transmembrane ER and ERGIC protein                                        |
| CLOCK   | clock circadian regulator                                                       |
| CLP1    | cleavage and polyadenylation factor I subunit 1                                 |
| CLTC    | clathrin heavy chain                                                            |
| CMPK1   | cytidine/uridine monophosphate kinase 1                                         |
| CNEP1R1 | CTD nuclear envelope phosphatase 1 regulatory subunit 1                         |
| CNGB3   | cyclic nucleotide gated channel beta 3                                          |
| CNIH3   | cornichon family AMPA receptor auxiliary protein 3                              |
| CNKSR2  | connector enhancer of kinase suppressor of Ras 2                                |
| CNKSR3  | CNKSR family member 3                                                           |
| CNN3    | calponin 3                                                                      |

|          |                                                                  |
|----------|------------------------------------------------------------------|
| CNNM2    | cyclin and CBS domain divalent metal cation transport mediator 2 |
| CNOT2    | CCR4-NOT transcription complex subunit 2                         |
| CNOT4    | CCR4-NOT transcription complex subunit 4                         |
| CNOT6    | CCR4-NOT transcription complex subunit 6                         |
| CNOT7    | CCR4-NOT transcription complex subunit 7                         |
| CNST     | consortin, connexin sorting protein                              |
| CNTD1    | cyclin N-terminal domain containing 1                            |
| CNTFR    | ciliary neurotrophic factor receptor                             |
| CNTN4    | contactin 4                                                      |
| CNTN6    | contactin 6                                                      |
| CNTNAP2  | contactin associated protein like 2                              |
| CNTNAP3  | contactin associated protein like 3                              |
| CNTRL    | centriolin                                                       |
| COIL     | coilin                                                           |
| COL10A1  | collagen type X alpha 1 chain                                    |
| COL11A1  | collagen type XI alpha 1 chain                                   |
| COL12A1  | collagen type XII alpha 1 chain                                  |
| COL13A1  | collagen type XIII alpha 1 chain                                 |
| COL15A1  | collagen type XV alpha 1 chain                                   |
| COL1A1   | collagen type I alpha 1 chain                                    |
| COL1A2   | collagen type I alpha 2 chain                                    |
| COL22A1  | collagen type XXII alpha 1 chain                                 |
| COL24A1  | collagen type XXIV alpha 1 chain                                 |
| COL25A1  | collagen type XXV alpha 1 chain                                  |
| COL27A1  | collagen type XXVII alpha 1 chain                                |
| COL3A1   | collagen type III alpha 1 chain                                  |
| COL4A1   | collagen type IV alpha 1 chain                                   |
| COL4A2   | collagen type IV alpha 2 chain                                   |
| COL4A3BP | collagen type IV alpha 3 binding protein                         |
| COL4A5   | collagen type IV alpha 5 chain                                   |
| COL4A6   | collagen type IV alpha 6 chain                                   |
| COL5A2   | collagen type V alpha 2 chain                                    |

|        |                                                       |
|--------|-------------------------------------------------------|
| COL6A3 | collagen type VI alpha 3 chain                        |
| COL6A6 | collagen type VI alpha 6 chain                        |
| COL9A3 | collagen type IX alpha 3 chain                        |
| COMMD2 | COMM domain containing 2                              |
| COMMD3 | COMM domain containing 3                              |
| COMMD8 | COMM domain containing 8                              |
| COPS2  | COP9 signalosome subunit 2                            |
| COPS8  | COP9 signalosome subunit 8                            |
| CORIN  | corin, serine peptidase                               |
| CORO1C | coronin 1C                                            |
| CORO7  | coronin 7                                             |
| COTL1  | coactosin like F-actin binding protein 1              |
| COX18  | cytochrome c oxidase assembly factor COX18            |
| COX8C  | cytochrome c oxidase subunit 8C                       |
| CPA4   | carboxypeptidase A4                                   |
| CPD    | carboxypeptidase D                                    |
| CPE    | carboxypeptidase E                                    |
| CPEB3  | cytoplasmic polyadenylation element binding protein 3 |
| CPEB4  | cytoplasmic polyadenylation element binding protein 4 |
| CPED1  | cadherin like and PC-esterase domain containing 1     |
| CPLX2  | complexin 2                                           |
| CPM    | carboxypeptidase M                                    |
| CPNE8  | copine 8                                              |
| CPSF2  | cleavage and polyadenylation specific factor 2        |
| CPSF7  | cleavage and polyadenylation specific factor 7        |
| CRCP   | CGRP receptor component                               |
| CRCT1  | cysteine rich C-terminal 1                            |
| CREB1  | cAMP responsive element binding protein 1             |
| CREB5  | cAMP responsive element binding protein 5             |
| CREBBP | CREB binding protein                                  |
| CREBL2 | cAMP responsive element binding protein like 2        |
| CREBZF | CREB/ATF bZIP transcription factor                    |

|            |                                                          |
|------------|----------------------------------------------------------|
| CREG1      | cellular repressor of E1A stimulated genes 1             |
| CREG2      | cellular repressor of E1A stimulated genes 2             |
| CRIM1      | cysteine rich transmembrane BMP regulator 1              |
| CRISPLD1   | cysteine rich secretory protein LCCL domain containing 1 |
| CRK        | CRK proto-oncogene, adaptor protein                      |
| CRKL       | CRK like proto-oncogene, adaptor protein                 |
| CRTAM      | cytotoxic and regulatory T cell molecule                 |
| CRTAP      | cartilage associated protein                             |
| CRYBG3     | crystallin beta-gamma domain containing 3                |
| CS         | citrate synthase                                         |
| CSAD       | cysteine sulfinic acid decarboxylase                     |
| CSDE1      | cold shock domain containing E1                          |
| CSGALNACT1 | chondroitin sulfate N-acetylgalactosaminyltransferase 1  |
| CSMD1      | CUB and Sushi multiple domains 1                         |
| CSNK1A1    | casein kinase 1 alpha 1                                  |
| CSNK1G1    | casein kinase 1 gamma 1                                  |
| CSNK2A1    | casein kinase 2 alpha 1                                  |
| CSRNP3     | cysteine and serine rich nuclear protein 3               |
| CSTA       | cystatin A                                               |
| CSTF2      | cleavage stimulation factor subunit 2                    |
| CT62       | cancer/testis antigen 62                                 |
| CTAGE1     | cutaneous T cell lymphoma-associated antigen 1           |
| CTBP2      | C-terminal binding protein 2                             |
| CTDSP2     | CTD small phosphatase 2                                  |
| CTDSPL2    | CTD small phosphatase like 2                             |
| CTGF       | connective tissue growth factor                          |
| CTHRC1     | collagen triple helix repeat containing 1                |
| CTNND2     | catenin delta 2                                          |
| CTNS       | cystinosis, lysosomal cystine transporter                |
| CTPS1      | CTP synthase 1                                           |
| CTPS2      | CTP synthase 2                                           |
| CTSA       | cathepsin A                                              |

|           |                                                     |
|-----------|-----------------------------------------------------|
| CTSC      | cathepsin C                                         |
| CTTNBP2NL | CTTNBP2 N-terminal like                             |
| CTXN3     | cortexin 3                                          |
| CUL2      | cullin 2                                            |
| CXCL14    | C-X-C motif chemokine ligand 14                     |
| CXCL6     | C-X-C motif chemokine ligand 6                      |
| CXCL9     | C-X-C motif chemokine ligand 9                      |
| CXCR2     | C-X-C motif chemokine receptor 2                    |
| CXCR4     | C-X-C motif chemokine receptor 4                    |
| CXorf58   | chromosome X open reading frame 58                  |
| CXXC4     | CXXC finger protein 4                               |
| CYB561    | cytochrome b561                                     |
| CYB561D1  | cytochrome b561 family member D1                    |
| CYCS      | cytochrome c, somatic                               |
| CYLC2     | cylicin 2                                           |
| CYP19A1   | cytochrome P450 family 19 subfamily A member 1      |
| CYP20A1   | cytochrome P450 family 20 subfamily A member 1      |
| CYP24A1   | cytochrome P450 family 24 subfamily A member 1      |
| CYP2C8    | cytochrome P450 family 2 subfamily C member 8       |
| CYP2R1    | cytochrome P450 family 2 subfamily R member 1       |
| CYP46A1   | cytochrome P450 family 46 subfamily A member 1      |
| CYP4B1    | cytochrome P450 family 4 subfamily B member 1       |
| CYP4F2    | cytochrome P450 family 4 subfamily F member 2       |
| CYP4F3    | cytochrome P450 family 4 subfamily F member 3       |
| CYSLTR1   | cysteinyl leukotriene receptor 1                    |
| CYTH1     | cytohesin 1                                         |
| CYTH3     | cytohesin 3                                         |
| CYYR1     | cysteine and tyrosine rich 1                        |
| DAAM1     | dishevelled associated activator of morphogenesis 1 |
| DAAM2     | dishevelled associated activator of morphogenesis 2 |
| DAB1      | DAB1, reelin adaptor protein                        |
| DAB2      | DAB2, clathrin adaptor protein                      |



|          |                                                       |
|----------|-------------------------------------------------------|
| DAG1     | dystroglycan 1                                        |
| DAGLA    | diacylglycerol lipase alpha                           |
| DARS     | aspartyl-tRNA synthetase                              |
| DAZ2     | deleted in azoospermia 2                              |
| DAZ3     | deleted in azoospermia 3                              |
| DAZAP2   | DAZ associated protein 2                              |
| DAZL     | deleted in azoospermia like                           |
| DBF4     | DBF4 zinc finger                                      |
| DBR1     | debranching RNA lariats 1                             |
| DCAF12L1 | DDB1 and CUL4 associated factor 12 like 1             |
| DCAF15   | DDB1 and CUL4 associated factor 15                    |
| DCAF4L1  | DDB1 and CUL4 associated factor 4 like 1              |
| DCAF4L2  | DDB1 and CUL4 associated factor 4 like 2              |
| DCAF5    | DDB1 and CUL4 associated factor 5                     |
| DCAF6    | DDB1 and CUL4 associated factor 6                     |
| DCAF8    | DDB1 and CUL4 associated factor 8                     |
| DCBLD1   | discoidin, CUB and LCCL domain containing 1           |
| DCBLD2   | discoidin, CUB and LCCL domain containing 2           |
| DCDC2    | doublecortin domain containing 2                      |
| DCLK3    | doublecortin like kinase 3                            |
| DCLRE1B  | DNA cross-link repair 1B                              |
| DCLRE1C  | DNA cross-link repair 1C                              |
| DCP2     | decapping mRNA 2                                      |
| DCUN1D1  | defective in cullin neddylation 1 domain containing 1 |
| DCUN1D3  | defective in cullin neddylation 1 domain containing 3 |
| DCUN1D4  | defective in cullin neddylation 1 domain containing 4 |
| DCX      | doublecortin                                          |
| DDAH1    | dimethylarginine dimethylaminohydrolase 1             |
| DDHD1    | DDHD domain containing 1                              |
| DDHD2    | DDHD domain containing 2                              |
| DDI2     | DNA damage inducible 1 homolog 2                      |
| DDIT4    | DNA damage inducible transcript 4                     |

|         |                                          |
|---------|------------------------------------------|
| DDTL    | D-dopachrome tautomerase like            |
| DDX17   | DEAD-box helicase 17                     |
| DDX18   | DEAD-box helicase 18                     |
| DDX19A  | DEAD-box helicase 19A                    |
| DDX19B  | DEAD-box helicase 19B                    |
| DDX20   | DEAD-box helicase 20                     |
| DDX46   | DEAD-box helicase 46                     |
| DDX5    | DEAD-box helicase 5                      |
| DDX53   | DEAD-box helicase 53                     |
| DDX55   | DEAD-box helicase 55                     |
| DECR2   | 2,4-dienoyl-CoA reductase 2              |
| DEFB119 | defensin beta 119                        |
| DEFB132 | defensin beta 132                        |
| DENND2C | DENN domain containing 2C                |
| DENND4C | DENN domain containing 4C                |
| DENND6A | DENN domain containing 6A                |
| DEPDC1  | DEP domain containing 1                  |
| DERL1   | derlin 1                                 |
| DESI2   | desumoylating isopeptidase 2             |
| DEXI    | Dexi homolog                             |
| DFFB    | DNA fragmentation factor subunit beta    |
| DGKA    | diacylglycerol kinase alpha              |
| DGKE    | diacylglycerol kinase epsilon            |
| DGKH    | diacylglycerol kinase eta                |
| DGKZ    | diacylglycerol kinase zeta               |
| DHX15   | DEAH-box helicase 15                     |
| DHX36   | DEAH-box helicase 36                     |
| DIABLO  | diablo IAP-binding mitochondrial protein |
| DIAPH2  | diaphanous related formin 2              |
| DIAPH3  | diaphanous related formin 3              |
| DICER1  | dicer 1, ribonuclease III                |
| DIEXF   |                                          |

|               |                                                    |
|---------------|----------------------------------------------------|
| DIMT1         | DIM1 dimethyladenosine transferase 1 homolog       |
| DIP2B         | disco interacting protein 2 homolog B              |
| DIRAS2        | DIRAS family GTPase 2                              |
| DKK1          | dickkopf WNT signaling pathway inhibitor 1         |
| DLC1          | DLC1 Rho GTPase activating protein                 |
| DLG2          | discs large MAGUK scaffold protein 2               |
| DLG4          | discs large MAGUK scaffold protein 4               |
| DLGAP2        | DLG associated protein 2                           |
| DLGAP4        | DLG associated protein 4                           |
| DLL4          | delta like canonical Notch ligand 4                |
| DLST          | dihydrolipoamide S-succinyltransferase             |
| DMD           | dystrophin                                         |
| DMP1          | dentin matrix acidic phosphoprotein 1              |
| DMRT2         | doublesex and mab-3 related transcription factor 2 |
| DNA2          | DNA replication helicase/nuclease 2                |
| DNAJA2        | DnaJ heat shock protein family (Hsp40) member A2   |
| DNAJB9        | DnaJ heat shock protein family (Hsp40) member B9   |
| DNAJC13       | DnaJ heat shock protein family (Hsp40) member C13  |
| DNAJC21       | DnaJ heat shock protein family (Hsp40) member C21  |
| DNAJC25       | DnaJ heat shock protein family (Hsp40) member C25  |
| DNAJC25-GNG10 | DNAJC25-GNG10 readthrough                          |
| DNAJC3        | DnaJ heat shock protein family (Hsp40) member C3   |
| DNAJC5        | DnaJ heat shock protein family (Hsp40) member C5   |
| DNAL1         | dynein axonemal light chain 1                      |
| DNASE2B       | deoxyribonuclease 2 beta                           |
| DNM3          | dynammin 3                                         |
| DNMBP         | dynammin binding protein                           |
| DNMT3A        | DNA methyltransferase 3 alpha                      |
| DOC2A         | double C2 domain alpha                             |
| DOCK5         | dedicator of cytokinesis 5                         |
| DOCK7         | dedicator of cytokinesis 7                         |
| DOK3          | docking protein 3                                  |

|          |                                                            |
|----------|------------------------------------------------------------|
| DOK5     | docking protein 5                                          |
| DOLPP1   | dolichyldiphosphatase 1                                    |
| DPAGT1   | dolichyl-phosphate N-acetylglucosaminophosphotransferase 1 |
| DPH1     | diphthamide biosynthesis 1                                 |
| DPH3     | diphthamide biosynthesis 3                                 |
| DPY19L1  | dpy-19 like C-mannosyltransferase 1                        |
| DPY19L3  | dpy-19 like C-mannosyltransferase 3                        |
| DPYSL2   | dihydropyrimidinase like 2                                 |
| DPYSL5   | dihydropyrimidinase like 5                                 |
| DRAM1    | DNA damage regulated autophagy modulator 1                 |
| DRD1     | dopamine receptor D1                                       |
| DRP2     | dystrophin related protein 2                               |
| DSC3     | desmocollin 3                                              |
| DSG1     | desmoglein 1                                               |
| DSG3     | desmoglein 3                                               |
| DST      | dystonin                                                   |
| DTD2     | D-tyrosyl-tRNA deacylase 2 (putative)                      |
| DTNA     | dystrobrevin alpha                                         |
| DTX2     | deltex E3 ubiquitin ligase 2                               |
| DTX4     | deltex E3 ubiquitin ligase 4                               |
| DUOX1    | dual oxidase 1                                             |
| DUSP1    | dual specificity phosphatase 1                             |
| DUSP16   | dual specificity phosphatase 16                            |
| DUSP22   | dual specificity phosphatase 22                            |
| DUSP4    | dual specificity phosphatase 4                             |
| DUSP6    | dual specificity phosphatase 6                             |
| DUSP9    | dual specificity phosphatase 9                             |
| DUT      | deoxyuridine triphosphatase                                |
| DVL3     | dishevelled segment polarity protein 3                     |
| DYNAP    | dynactin associated protein                                |
| DYNC1LI2 | dynein cytoplasmic 1 light intermediate chain 2            |
| DYNC2LI1 | dynein cytoplasmic 2 light intermediate chain 1            |

|         |                                                                 |
|---------|-----------------------------------------------------------------|
| DYRK1A  | dual specificity tyrosine phosphorylation regulated kinase 1A   |
| DYRK2   | dual specificity tyrosine phosphorylation regulated kinase 2    |
| DZIP1   | DAZ interacting zinc finger protein 1                           |
| E2F2    | E2F transcription factor 2                                      |
| E2F3    | E2F transcription factor 3                                      |
| E2F5    | E2F transcription factor 5                                      |
| E2F6    | E2F transcription factor 6                                      |
| E2F7    | E2F transcription factor 7                                      |
| EAH1    | ELL associated factor 1                                         |
| EBPL    | EBP like                                                        |
| ECHDC2  | enoyl-CoA hydratase domain containing 2                         |
| EDEM1   | ER degradation enhancing alpha-mannosidase like protein 1       |
| EDEM3   | ER degradation enhancing alpha-mannosidase like protein 3       |
| EDN1    | endothelin 1                                                    |
| EEA1    | early endosome antigen 1                                        |
| EED     | embryonic ectoderm development                                  |
| EEF2K   | eukaryotic elongation factor 2 kinase                           |
| EEPD1   | endonuclease/exonuclease/phosphatase family domain containing 1 |
| EFCAB14 | EF-hand calcium binding domain 14                               |
| EFHD2   | EF-hand domain family member D2                                 |
| EFNA1   | ephrin A1                                                       |
| EFNA3   | ephrin A3                                                       |
| EFNB2   | ephrin B2                                                       |
| EFR3A   | EFR3 homolog A                                                  |
| EGFR    | epidermal growth factor receptor                                |
| EGLN1   | egl-9 family hypoxia inducible factor 1                         |
| EGLN2   | egl-9 family hypoxia inducible factor 2                         |
| EGR2    | early growth response 2                                         |
| EHF     | ETS homologous factor                                           |
| EIF1AX  | eukaryotic translation initiation factor 1A X-linked            |
| EIF2AK2 | eukaryotic translation initiation factor 2 alpha kinase 2       |
| EIF2S1  | eukaryotic translation initiation factor 2 subunit alpha        |

|           |                                                                                |
|-----------|--------------------------------------------------------------------------------|
| EIF3J     | eukaryotic translation initiation factor 3 subunit J                           |
| EIF4E     | eukaryotic translation initiation factor 4E                                    |
| EIF4E3    | eukaryotic translation initiation factor 4E family member 3                    |
| EIF4ENIF1 | eukaryotic translation initiation factor 4E nuclear import factor 1            |
| EIF4G2    | eukaryotic translation initiation factor 4 gamma 2                             |
| EIF5A2    | eukaryotic translation initiation factor 5A2                                   |
| EIF5B     | eukaryotic translation initiation factor 5B                                    |
| ELAVL2    | ELAV like RNA binding protein 2                                                |
| ELAVL3    | ELAV like RNA binding protein 3                                                |
| ELAVL4    | ELAV like RNA binding protein 4                                                |
| ELF2      | E74 like ETS transcription factor 2                                            |
| ELF4      | E74 like ETS transcription factor 4                                            |
| ELFN2     | extracellular leucine rich repeat and fibronectin type III domain containing 2 |
| ELK3      | ELK3, ETS transcription factor                                                 |
| ELK4      | ELK4, ETS transcription factor                                                 |
| ELL2      | elongation factor for RNA polymerase II 2                                      |
| ELMOD1    | ELMO domain containing 1                                                       |
| ELMOD2    | ELMO domain containing 2                                                       |
| ELMSAN1   | ELM2 and Myb/SANT domain containing 1                                          |
| ELN       | elastin                                                                        |
| ELOVL2    | ELOVL fatty acid elongase 2                                                    |
| ELOVL4    | ELOVL fatty acid elongase 4                                                    |
| ELOVL5    | ELOVL fatty acid elongase 5                                                    |
| EMCN      | endomucin                                                                      |
| EML1      | echinoderm microtubule associated protein like 1                               |
| EML4      | echinoderm microtubule associated protein like 4                               |
| EMX2      | empty spiracles homeobox 2                                                     |
| EN2       | engrailed homeobox 2                                                           |
| ENAH      | ENAH, actin regulator                                                          |
| ENOX2     | ecto-NOX disulfide-thiol exchanger 2                                           |
| ENPEP     | glutamyl aminopeptidase                                                        |
| ENPP5     | ectonucleotide pyrophosphatase/phosphodiesterase 5 (putative)                  |

|          |                                                              |
|----------|--------------------------------------------------------------|
| ENTPD1   | ectonucleoside triphosphate diphosphohydrolase 1             |
| ENY2     | ENY2, transcription and export complex 2 subunit             |
| EOGT     | EGF domain specific O-linked N-acetylglucosamine transferase |
| EP400    | E1A binding protein p400                                     |
| EPB41    | erythrocyte membrane protein band 4.1                        |
| EPB41L1  | erythrocyte membrane protein band 4.1 like 1                 |
| EPB41L4A | erythrocyte membrane protein band 4.1 like 4A                |
| EPB41L4B | erythrocyte membrane protein band 4.1 like 4B                |
| EPB41L5  | erythrocyte membrane protein band 4.1 like 5                 |
| EPC1     | enhancer of polycomb homolog 1                               |
| EPDR1    | ependymin related 1                                          |
| EPG5     | ectopic P-granules autophagy protein 5 homolog               |
| EPHA2    | EPH receptor A2                                              |
| EPHA3    | EPH receptor A3                                              |
| EPHA4    | EPH receptor A4                                              |
| EPHA5    | EPH receptor A5                                              |
| EPHA7    | EPH receptor A7                                              |
| EPHB1    | EPH receptor B1                                              |
| EPHB2    | EPH receptor B2                                              |
| EPPIN    | epididymal peptidase inhibitor                               |
| EPS15    | epidermal growth factor receptor pathway substrate 15        |
| EPS8     | epidermal growth factor receptor pathway substrate 8         |
| ERBB3    | erb-b2 receptor tyrosine kinase 3                            |
| ERBB4    | erb-b2 receptor tyrosine kinase 4                            |
| ERCC4    | ERCC excision repair 4, endonuclease catalytic subunit       |
| ERCC6    | ERCC excision repair 6, chromatin remodeling factor          |
| ERCC6L2  | ERCC excision repair 6 like 2                                |
| EREG     | epiregulin                                                   |
| ERG      | ETS transcription factor ERG                                 |
| ERI1     | exoribonuclease 1                                            |
| ERI2     | ERI1 exoribonuclease family member 2                         |
| ERLIN1   | ER lipid raft associated 1                                   |

|          |                                                                  |
|----------|------------------------------------------------------------------|
| ERMP1    | endoplasmic reticulum metallopeptidase 1                         |
| ERP29    | endoplasmic reticulum protein 29                                 |
| ERRFI1   | ERBB receptor feedback inhibitor 1                               |
| ERVFRD-1 | endogenous retrovirus group FRD member 1, envelope               |
| ESCO1    | establishment of sister chromatid cohesion N-acetyltransferase 1 |
| ESM1     | endothelial cell specific molecule 1                             |
| ESPL1    | extra spindle pole bodies like 1, separase                       |
| ESR1     | estrogen receptor 1                                              |
| ESR2     | estrogen receptor 2                                              |
| ESRP1    | epithelial splicing regulatory protein 1                         |
| ESRP2    | epithelial splicing regulatory protein 2                         |
| ESYT1    | extended synaptotagmin 1                                         |
| ETNK1    | ethanolamine kinase 1                                            |
| ETNK2    | ethanolamine kinase 2                                            |
| ETS1     | ETS proto-oncogene 1, transcription factor                       |
| ETS2     | ETS proto-oncogene 2, transcription factor                       |
| ETV1     | ETS variant 1                                                    |
| ETV3     | ETS variant 3                                                    |
| EVA1C    | eva-1 homolog C                                                  |
| EVI2B    | ecotropic viral integration site 2B                              |
| EVI5     | ecotropic viral integration site 5                               |
| EVX2     | even-skipped homeobox 2                                          |
| EXOC6    | exocyst complex component 6                                      |
| EXOG     | exo/endonuclease G                                               |
| EXTL2    | exostosin like glycosyltransferase 2                             |
| EYA2     | EYA transcriptional coactivator and phosphatase 2                |
| EYA3     | EYA transcriptional coactivator and phosphatase 3                |
| EYA4     | EYA transcriptional coactivator and phosphatase 4                |
| EZH1     | enhancer of zeste 1 polycomb repressive complex 2 subunit        |
| EZH2     | enhancer of zeste 2 polycomb repressive complex 2 subunit        |
| F9       | coagulation factor IX                                            |
| FA2H     | fatty acid 2-hydroxylase                                         |



|          |                                                   |
|----------|---------------------------------------------------|
| FAHD1    | fumarylacetoacetate hydrolase domain containing 1 |
| FAIM     | Fas apoptotic inhibitory molecule                 |
| FAM102A  | family with sequence similarity 102 member A      |
| FAM103A1 |                                                   |
| FAM104A  | family with sequence similarity 104 member A      |
| FAM107B  | family with sequence similarity 107 member B      |
| FAM109A  |                                                   |
| FAM110B  | family with sequence similarity 110 member B      |
| FAM118A  | family with sequence similarity 118 member A      |
| FAM118B  | family with sequence similarity 118 member B      |
| FAM120C  | family with sequence similarity 120C              |
| FAM122A  | family with sequence similarity 122A              |
| FAM122C  | family with sequence similarity 122C              |
| FAM126A  | family with sequence similarity 126 member A      |
| FAM126B  | family with sequence similarity 126 member B      |
| FAM129A  | family with sequence similarity 129 member A      |
| FAM133A  | family with sequence similarity 133 member A      |
| FAM135A  | family with sequence similarity 135 member A      |
| FAM135B  | family with sequence similarity 135 member B      |
| FAM13A   | family with sequence similarity 13 member A       |
| FAM155A  | family with sequence similarity 155 member A      |
| FAM160B1 | family with sequence similarity 160 member B1     |
| FAM168A  | family with sequence similarity 168 member A      |
| FAM168B  | family with sequence similarity 168 member B      |
| FAM169A  | family with sequence similarity 169 member A      |
| FAM169B  | family with sequence similarity 169 member B      |
| FAM170B  | family with sequence similarity 170 member B      |
| FAM171A2 | family with sequence similarity 171 member A2     |
| FAM172A  | family with sequence similarity 172 member A      |
| FAM184B  | family with sequence similarity 184 member B      |
| FAM189A1 | family with sequence similarity 189 member A1     |
| FAM189A2 | family with sequence similarity 189 member A2     |

|         |                                                                        |
|---------|------------------------------------------------------------------------|
| FAM199X | family with sequence similarity 199, X-linked                          |
| FAM19A2 | family with sequence similarity 19 member A2, C-C motif chemokine like |
| FAM19A4 | family with sequence similarity 19 member A4, C-C motif chemokine like |
| FAM19A5 | family with sequence similarity 19 member A5, C-C motif chemokine like |
| FAM208A | family with sequence similarity 208 member A                           |
| FAM210A | family with sequence similarity 210 member A                           |
| FAM210B | family with sequence similarity 210 member B                           |
| FAM214A | family with sequence similarity 214 member A                           |
| FAM214B | family with sequence similarity 214 member B                           |
| FAM217B | family with sequence similarity 217 member B                           |
| FAM218A | family with sequence similarity 218 member A                           |
| FAM219A | family with sequence similarity 219 member A                           |
| FAM219B | family with sequence similarity 219 member B                           |
| FAM221A | family with sequence similarity 221 member A                           |
| FAM222B | family with sequence similarity 222 member B                           |
| FAM24A  | family with sequence similarity 24 member A                            |
| FAM43A  | family with sequence similarity 43 member A                            |
| FAM46A  |                                                                        |
| FAM46D  |                                                                        |
| FAM49A  | family with sequence similarity 49 member A                            |
| FAM49B  | family with sequence similarity 49 member B                            |
| FAM53C  | family with sequence similarity 53 member C                            |
| FAM69A  | family with sequence similarity 69 member A                            |
| FAM71D  | family with sequence similarity 71 member D                            |
| FAM72A  | family with sequence similarity 72 member A                            |
| FAM72B  | family with sequence similarity 72 member B                            |
| FAM81A  | family with sequence similarity 81 member A                            |
| FAM83A  | family with sequence similarity 83 member A                            |
| FAM84A  | family with sequence similarity 84 member A                            |
| FAM8A1  | family with sequence similarity 8 member A1                            |
| FAM91A1 | family with sequence similarity 91 member A1                           |
| FAM96A  |                                                                        |

|        |                                                  |
|--------|--------------------------------------------------|
| FAM98A | family with sequence similarity 98 member A      |
| FAM98B | family with sequence similarity 98 member B      |
| FAM9B  | family with sequence similarity 9 member B       |
| FAM9C  | family with sequence similarity 9 member C       |
| FAN1   | FANCD2 and FANCI associated nuclease 1           |
| FANCE  | FA complementation group E                       |
| FANCF  | FA complementation group F                       |
| FAP    | fibroblast activation protein alpha              |
| FAR2   | fatty acyl-CoA reductase 2                       |
| FARP1  | FERM, ARH/RhoGEF and pleckstrin domain protein 1 |
| FAS    | Fas cell surface death receptor                  |
| FAXC   | failed axon connections homolog                  |
| FBLN2  | fibulin 2                                        |
| FBP1   | fructose-bisphosphatase 1                        |
| FBXL12 | F-box and leucine rich repeat protein 12         |
| FBXL14 | F-box and leucine rich repeat protein 14         |
| FBXL17 | F-box and leucine rich repeat protein 17         |
| FBXL19 | F-box and leucine rich repeat protein 19         |
| FBXL3  | F-box and leucine rich repeat protein 3          |
| FBXO10 | F-box protein 10                                 |
| FBXO11 | F-box protein 11                                 |
| FBXO15 | F-box protein 15                                 |
| FBXO22 | F-box protein 22                                 |
| FBXO28 | F-box protein 28                                 |
| FBXO30 | F-box protein 30                                 |
| FBXO32 | F-box protein 32                                 |
| FBXO33 | F-box protein 33                                 |
| FBXO39 | F-box protein 39                                 |
| FBXO45 | F-box protein 45                                 |
| FBXO48 | F-box protein 48                                 |
| FBXW11 | F-box and WD repeat domain containing 11         |
| FBXW2  | F-box and WD repeat domain containing 2          |

|        |                                                                    |
|--------|--------------------------------------------------------------------|
| FBXW7  | F-box and WD repeat domain containing 7                            |
| FCHO2  | FCH domain only 2                                                  |
| FCRL5  | Fc receptor like 5                                                 |
| FDXR   | ferredoxin reductase                                               |
| FEM1C  | fem-1 homolog C                                                    |
| FEN1   | flap structure-specific endonuclease 1                             |
| FER    | FER tyrosine kinase                                                |
| FERMT2 | fermitin family member 2                                           |
| FEZ2   | fasciculation and elongation protein zeta 2                        |
| FGD1   | FYVE, RhoGEF and PH domain containing 1                            |
| FGD4   | FYVE, RhoGEF and PH domain containing 4                            |
| FGD6   | FYVE, RhoGEF and PH domain containing 6                            |
| FGF11  | fibroblast growth factor 11                                        |
| FGF20  | fibroblast growth factor 20                                        |
| FGF21  | fibroblast growth factor 21                                        |
| FGFR1  | fibroblast growth factor receptor 1                                |
| FGL2   | fibrinogen like 2                                                  |
| FHL1   | four and a half LIM domains 1                                      |
| FICD   | FIC domain containing                                              |
| FIGN   | fidgetin, microtubule severing factor                              |
| FJX1   | four jointed box 1                                                 |
| FKBP4  | FK506 binding protein 4                                            |
| FKTN   | fukutin                                                            |
| FLI1   | Fli-1 proto-oncogene, ETS transcription factor                     |
| FLII   | FLII, actin remodeling protein                                     |
| FLNA   | filamin A                                                          |
| FLVCR1 | feline leukemia virus subgroup C cellular receptor 1               |
| FLVCR2 | feline leukemia virus subgroup C cellular receptor family member 2 |
| FMNL2  | formin like 2                                                      |
| FMNL3  | formin like 3                                                      |
| FMR1   | fragile X mental retardation 1                                     |
| FMR1NB | FMR1 neighbor                                                      |

|        |                                                        |
|--------|--------------------------------------------------------|
| FNBP1L | formin binding protein 1 like                          |
| FNBP4  | formin binding protein 4                               |
| FNDC3A | fibronectin type III domain containing 3A              |
| FNDC3B | fibronectin type III domain containing 3B              |
| FNIP1  | folliculin interacting protein 1                       |
| FNIP2  | folliculin interacting protein 2                       |
| FNTB   | farnesyltransferase, CAAX box, beta                    |
| FOPNL  | FGFR1OP N-terminal like                                |
| FOS    | Fos proto-oncogene, AP-1 transcription factor subunit  |
| FOSB   | FosB proto-oncogene, AP-1 transcription factor subunit |
| FOSL2  | FOS like 2, AP-1 transcription factor subunit          |
| FOXA1  | forkhead box A1                                        |
| FOXF1  | forkhead box F1                                        |
| FOXG1  | forkhead box G1                                        |
| FO XK2 | forkhead box K2                                        |
| FOXO3  | forkhead box O3                                        |
| FOXP1  | forkhead box P1                                        |
| FOXP2  | forkhead box P2                                        |
| FOXR2  | forkhead box R2                                        |
| FRAS1  | Fraser extracellular matrix complex subunit 1          |
| FRAT1  | FRAT1, WNT signaling pathway regulator                 |
| FRAT2  | FRAT2, WNT signaling pathway regulator                 |
| FREM2  | FRAS1 related extracellular matrix protein 2           |
| FRMD4B | FERM domain containing 4B                              |
| FRMD5  | FERM domain containing 5                               |
| FRMD6  | FERM domain containing 6                               |
| FRS2   | fibroblast growth factor receptor substrate 2          |
| FRZB   | frizzled related protein                               |
| FSD1L  | fibronectin type III and SPRY domain containing 1 like |
| FSIP1  | fibrous sheath interacting protein 1                   |
| FSTL1  | folliculin like 1                                      |
| FUBP1  | far upstream element binding protein 1                 |

|         |                                                        |
|---------|--------------------------------------------------------|
| FUBP3   | far upstream element binding protein 3                 |
| FUCA1   | alpha-L-fucosidase 1                                   |
| FUT3    | fucosyltransferase 3 (Lewis blood group)               |
| FUT4    | fucosyltransferase 4                                   |
| FUT9    | fucosyltransferase 9                                   |
| FXR1    | FMR1 autosomal homolog 1                               |
| FXR2    | FMR1 autosomal homolog 2                               |
| FYCO1   | FYVE and coiled-coil domain containing 1               |
| FZD3    | frizzled class receptor 3                              |
| FZD4    | frizzled class receptor 4                              |
| G6PC    | glucose-6-phosphatase catalytic subunit                |
| G6PC2   | glucose-6-phosphatase catalytic subunit 2              |
| G6PD    | glucose-6-phosphate dehydrogenase                      |
| GAB1    | GRB2 associated binding protein 1                      |
| GAB3    | GRB2 associated binding protein 3                      |
| GABBR2  | gamma-aminobutyric acid type B receptor subunit 2      |
| GABPA   | GA binding protein transcription factor subunit alpha  |
| GABPB1  | GA binding protein transcription factor subunit beta 1 |
| GABRA2  | gamma-aminobutyric acid type A receptor alpha2 subunit |
| GABRA4  | gamma-aminobutyric acid type A receptor alpha4 subunit |
| GABRA5  | gamma-aminobutyric acid type A receptor alpha5 subunit |
| GABRB1  | gamma-aminobutyric acid type A receptor beta1 subunit  |
| GABRG1  | gamma-aminobutyric acid type A receptor gamma1 subunit |
| GABRP   | gamma-aminobutyric acid type A receptor pi subunit     |
| GAD1    | glutamate decarboxylase 1                              |
| GADL1   | glutamate decarboxylase like 1                         |
| GAL3ST1 | galactose-3-O-sulfotransferase 1                       |
| GALC    | galactosylceramidase                                   |
| GALE    | UDP-galactose-4-epimerase                              |
| GALK2   | galactokinase 2                                        |
| GALNT1  | polypeptide N-acetylgalactosaminyltransferase 1        |
| GALNT10 | polypeptide N-acetylgalactosaminyltransferase 10       |

|         |                                                             |
|---------|-------------------------------------------------------------|
| GALNT13 | polypeptide N-acetylgalactosaminyltransferase 13            |
| GALNT15 | polypeptide N-acetylgalactosaminyltransferase 15            |
| GALNT16 | polypeptide N-acetylgalactosaminyltransferase 16            |
| GALNT2  | polypeptide N-acetylgalactosaminyltransferase 2             |
| GALNT3  | polypeptide N-acetylgalactosaminyltransferase 3             |
| GALNT4  | polypeptide N-acetylgalactosaminyltransferase 4             |
| GALNT7  | polypeptide N-acetylgalactosaminyltransferase 7             |
| GAN     | gigaxonin                                                   |
| GANC    | glucosidase alpha, neutral C                                |
| GAS2L3  | growth arrest specific 2 like 3                             |
| GAS7    | growth arrest specific 7                                    |
| GATA4   | GATA binding protein 4                                      |
| GATA5   | GATA binding protein 5                                      |
| GATM    | glycine amidinotransferase                                  |
| GBP1    | guanylate binding protein 1                                 |
| GBP3    | guanylate binding protein 3                                 |
| GBP6    | guanylate binding protein family member 6                   |
| GCH1    | GTP cyclohydrolase 1                                        |
| GCLC    | glutamate-cysteine ligase catalytic subunit                 |
| GCNT4   | glucosaminyl (N-acetyl) transferase 4, core 2               |
| GCSAM   | germinal center associated signaling and motility           |
| GCSAML  | germinal center associated signaling and motility like      |
| GDAP1   | ganglioside induced differentiation associated protein 1    |
| GDAP2   | ganglioside induced differentiation associated protein 2    |
| GDF6    | growth differentiation factor 6                             |
| GDPD1   | glycerophosphodiester phosphodiesterase domain containing 1 |
| GEMIN7  | gem nuclear organelle associated protein 7                  |
| GFM1    | G elongation factor mitochondrial 1                         |
| GFPT2   | glutamine-fructose-6-phosphate transaminase 2               |
| GGCT    | gamma-glutamylcyclotransferase                              |
| GHR     | growth hormone receptor                                     |
| GIMAP1  | GTPase, IMAP family member 1                                |

|         |                                             |
|---------|---------------------------------------------|
| GIMAP6  | GTPase, IMAP family member 6                |
| GIN1    | gypsy retrotransposon integrase 1           |
| GIPC1   | GIPC PDZ domain containing family member 1  |
| GIPC2   | GIPC PDZ domain containing family member 2  |
| GIT2    | GIT ArfGAP 2                                |
| GJA1    | gap junction protein alpha 1                |
| GJC1    | gap junction protein gamma 1                |
| GK5     | glycerol kinase 5                           |
| GLCCI1  | glucocorticoid induced 1                    |
| GLDC    | glycine decarboxylase                       |
| GLDN    | gliomedin                                   |
| GLI3    | GLI family zinc finger 3                    |
| GLIS2   | GLIS family zinc finger 2                   |
| GLMN    | glomulin, FKBP associated protein           |
| GLRX    | glutaredoxin                                |
| GLUD1   | glutamate dehydrogenase 1                   |
| GM2A    | GM2 ganglioside activator                   |
| GMDS    | GDP-mannose 4,6-dehydratase                 |
| GMNC    | geminin coiled-coil domain containing       |
| GNA13   | G protein subunit alpha 13                  |
| GNAI2   | G protein subunit alpha i2                  |
| GNAQ    | G protein subunit alpha q                   |
| GNG10   | G protein subunit gamma 10                  |
| GNG2    | G protein subunit gamma 2                   |
| GNG5    | G protein subunit gamma 5                   |
| GNPDA1  | glucosamine-6-phosphate deaminase 1         |
| GNPDA2  | glucosamine-6-phosphate deaminase 2         |
| GNPNAT1 | glucosamine-phosphate N-acetyltransferase 1 |
| GOLGA1  | golgin A1                                   |
| GOLGA4  | golgin A4                                   |
| GOLGA7  | golgin A7                                   |
| GOLGB1  | golgin B1                                   |



|            |                                                       |
|------------|-------------------------------------------------------|
| GOLPH3L    | golgi phosphoprotein 3 like                           |
| GOLT1B     | golgi transport 1B                                    |
| GOPC       | golgi associated PDZ and coiled-coil motif containing |
| GOSR1      | golgi SNAP receptor complex member 1                  |
| GOSR2      | golgi SNAP receptor complex member 2                  |
| GPALPP1    | GPALPP motifs containing 1                            |
| GPATCH2    | G-patch domain containing 2                           |
| GPATCH2L   | G-patch domain containing 2 like                      |
| GPATCH8    | G-patch domain containing 8                           |
| GPC4       | glypican 4                                            |
| GPCPD1     | glycerophosphocholine phosphodiesterase 1             |
| GPD2       | glycerol-3-phosphate dehydrogenase 2                  |
| GPED1      | G protein-coupled estrogen receptor 1                 |
| GPM6A      | glycoprotein M6A                                      |
| GPR137     | G protein-coupled receptor 137                        |
| GPR137C    | G protein-coupled receptor 137C                       |
| GPR150     | G protein-coupled receptor 150                        |
| GPR157     | G protein-coupled receptor 157                        |
| GPR158     | G protein-coupled receptor 158                        |
| GPR173     | G protein-coupled receptor 173                        |
| GPR26      | G protein-coupled receptor 26                         |
| GPR27      | G protein-coupled receptor 27                         |
| GPR52      | G protein-coupled receptor 52                         |
| GPR6       | G protein-coupled receptor 6                          |
| GPR61      | G protein-coupled receptor 61                         |
| GPR63      | G protein-coupled receptor 63                         |
| GPR75-ASB3 | GPR75-ASB3 readthrough                                |
| GPRIN3     | GPRIN family member 3                                 |
| GPX7       | glutathione peroxidase 7                              |
| GPX8       | glutathione peroxidase 8 (putative)                   |
| GRAMD1C    | GRAM domain containing 1C                             |
| GRB10      | growth factor receptor bound protein 10               |

|         |                                                                         |
|---------|-------------------------------------------------------------------------|
| GREB1   | growth regulating estrogen receptor binding 1                           |
| GRHL2   | grainyhead like transcription factor 2                                  |
| GRHL3   | grainyhead like transcription factor 3                                  |
| GRIA2   | glutamate ionotropic receptor AMPA type subunit 2                       |
| GRIA4   | glutamate ionotropic receptor AMPA type subunit 4                       |
| GRID2IP | Grid2 interacting protein                                               |
| GRIK2   | glutamate ionotropic receptor kainate type subunit 2                    |
| GRIN2B  | glutamate ionotropic receptor NMDA type subunit 2B                      |
| GRM6    | glutamate metabotropic receptor 6                                       |
| GRM7    | glutamate metabotropic receptor 7                                       |
| GRSF1   | G-rich RNA sequence binding factor 1                                    |
| GSAP    | gamma-secretase activating protein                                      |
| GSKIP   | GSK3B interacting protein                                               |
| GSPT1   | G1 to S phase transition 1                                              |
| GSR     | glutathione-disulfide reductase                                         |
| GSTA4   | glutathione S-transferase alpha 4                                       |
| GTDC1   | glycosyltransferase like domain containing 1                            |
| GTF2A1  | general transcription factor IIA subunit 1                              |
| GTF2E1  | general transcription factor IIE subunit 1                              |
| GTF2E2  | general transcription factor IIE subunit 2                              |
| GTF2H1  | general transcription factor IIH subunit 1                              |
| GUCY2C  | guanylate cyclase 2C                                                    |
| GXYLT1  | glucoside xylosyltransferase 1                                          |
| GYG2    | glycogenin 2                                                            |
| GYPE    | glycophorin E (MNS blood group)                                         |
| GZF1    | GDNF inducible zinc finger protein 1                                    |
| HABP4   | hyaluronan binding protein 4                                            |
| HACE1   | HECT domain and ankyrin repeat containing E3 ubiquitin protein ligase 1 |
| HAND1   | heart and neural crest derivatives expressed 1                          |
| HAND2   | heart and neural crest derivatives expressed 2                          |
| HAO1    | hydroxyacid oxidase 1                                                   |
| HAS2    | hyaluronan synthase 2                                                   |

|          |                                                                         |
|----------|-------------------------------------------------------------------------|
| HBP1     | HMG-box transcription factor 1                                          |
| HCAR1    | hydroxycarboxylic acid receptor 1                                       |
| HCFC2    | host cell factor C2                                                     |
| HCN1     | hyperpolarization activated cyclic nucleotide gated potassium channel 1 |
| HDAC4    | histone deacetylase 4                                                   |
| HDAC5    | histone deacetylase 5                                                   |
| HDLBP    | high density lipoprotein binding protein                                |
| HDX      | highly divergent homeobox                                               |
| HECTD2   | HECT domain E3 ubiquitin protein ligase 2                               |
| HECTD4   | HECT domain E3 ubiquitin protein ligase 4                               |
| HELLS    | helicase, lymphoid specific                                             |
| HELZ     | helicase with zinc finger                                               |
| HELZ2    | helicase with zinc finger 2                                             |
| HEPHL1   | hephaestin like 1                                                       |
| HFE      | homeostatic iron regulator                                              |
| HGF      | hepatocyte growth factor                                                |
| HHLA3    | HERV-H LTR-associating 3                                                |
| HIC2     | HIC ZBTB transcriptional repressor 2                                    |
| HIF1A    | hypoxia inducible factor 1 subunit alpha                                |
| HIF1AN   | hypoxia inducible factor 1 subunit alpha inhibitor                      |
| HIP1     | huntingtin interacting protein 1                                        |
| HIP1R    | huntingtin interacting protein 1 related                                |
| HIPK1    | homeodomain interacting protein kinase 1                                |
| HIPK2    | homeodomain interacting protein kinase 2                                |
| HIPK3    | homeodomain interacting protein kinase 3                                |
| HLA-DPA1 | major histocompatibility complex, class II, DP alpha 1                  |
| HLCS     | holocarboxylase synthetase                                              |
| HLX      | H2.0 like homeobox                                                      |
| HMBOX1   | homeobox containing 1                                                   |
| HMGA1    | high mobility group AT-hook 1                                           |
| HMGA2    | high mobility group AT-hook 2                                           |
| HMGB3    | high mobility group box 3                                               |

|         |                                                              |
|---------|--------------------------------------------------------------|
| HMGN1   | high mobility group nucleosome binding domain 1              |
| HNF4A   | hepatocyte nuclear factor 4 alpha                            |
| HNRNPA1 | heterogeneous nuclear ribonucleoprotein A1                   |
| HNRNPA3 | heterogeneous nuclear ribonucleoprotein A3                   |
| HNRNPC  | heterogeneous nuclear ribonucleoprotein C (C1/C2)            |
| HNRNPD  | heterogeneous nuclear ribonucleoprotein D                    |
| HNRNPH1 | heterogeneous nuclear ribonucleoprotein H1                   |
| HNRNPK  | heterogeneous nuclear ribonucleoprotein K                    |
| HNRNPLL | heterogeneous nuclear ribonucleoprotein L like               |
| HNRNPU  | heterogeneous nuclear ribonucleoprotein U                    |
| HOMER1  | homer scaffold protein 1                                     |
| HOMER2  | homer scaffold protein 2                                     |
| HOOK1   | hook microtubule tethering protein 1                         |
| HORMAD1 | HORMA domain containing 1                                    |
| HOXA1   | homeobox A1                                                  |
| HOXA11  | homeobox A11                                                 |
| HOXA3   | homeobox A3                                                  |
| HOXA4   | homeobox A4                                                  |
| HOXA5   | homeobox A5                                                  |
| HOXA9   | homeobox A9                                                  |
| HOXB4   | homeobox B4                                                  |
| HOXB8   | homeobox B8                                                  |
| HOXC10  | homeobox C10                                                 |
| HOXC4   | homeobox C4                                                  |
| HOXC9   | homeobox C9                                                  |
| HOXD1   | homeobox D1                                                  |
| HOXD13  | homeobox D13                                                 |
| HOXD3   | homeobox D3                                                  |
| HP1BP3  | heterochromatin protein 1 binding protein 3                  |
| HPGD    | 15-hydroxyprostaglandin dehydrogenase                        |
| HPS4    | HPS4, biogenesis of lysosomal organelles complex 3 subunit 2 |
| HPS5    | HPS5, biogenesis of lysosomal organelles complex 2 subunit 2 |

|          |                                                             |
|----------|-------------------------------------------------------------|
| HRK      | harakiri, BCL2 interacting protein                          |
| HS2ST1   | heparan sulfate 2-O-sulfotransferase 1                      |
| HS3ST1   | heparan sulfate-glucosamine 3-sulfotransferase 1            |
| HS3ST3A1 | heparan sulfate-glucosamine 3-sulfotransferase 3A1          |
| HS3ST3B1 | heparan sulfate-glucosamine 3-sulfotransferase 3B1          |
| HSD17B13 | hydroxysteroid 17-beta dehydrogenase 13                     |
| HSD17B6  | hydroxysteroid 17-beta dehydrogenase 6                      |
| HSPA12A  | heat shock protein family A (Hsp70) member 12A              |
| HSPA13   | heat shock protein family A (Hsp70) member 13               |
| HSPA14   | heat shock protein family A (Hsp70) member 14               |
| HSPA4L   | heat shock protein family A (Hsp70) member 4 like           |
| HSPA8    | heat shock protein family A (Hsp70) member 8                |
| HSPA9    | heat shock protein family A (Hsp70) member 9                |
| HSPD1    | heat shock protein family D (Hsp60) member 1                |
| HSPE1    | heat shock protein family E (Hsp10) member 1                |
| HTR1E    | 5-hydroxytryptamine receptor 1E                             |
| HTR1F    | 5-hydroxytryptamine receptor 1F                             |
| HTR4     | 5-hydroxytryptamine receptor 4                              |
| HTRA3    | HtrA serine peptidase 3                                     |
| IAH1     | isoamyl acetate hydrolyzing esterase 1 (putative)           |
| ICA1L    | islet cell autoantigen 1 like                               |
| ICK      | intestinal cell kinase                                      |
| ICOS     | inducible T cell costimulator                               |
| IDH1     | isocitrate dehydrogenase (NADP(+)) 1, cytosolic             |
| IDH2     | isocitrate dehydrogenase (NADP(+)) 2, mitochondrial         |
| IER5     | immediate early response 5                                  |
| IFI44L   | interferon induced protein 44 like                          |
| IFIT5    | interferon induced protein with tetratricopeptide repeats 5 |
| IFITM10  | interferon induced transmembrane protein 10                 |
| IFNG     | interferon gamma                                            |
| IFNGR2   | interferon gamma receptor 2                                 |
| IFNLR1   | interferon lambda receptor 1                                |

|          |                                                         |
|----------|---------------------------------------------------------|
| IFRD1    | interferon related developmental regulator 1            |
| IFT52    | intraflagellar transport 52                             |
| IFT80    | intraflagellar transport 80                             |
| IGDCC3   | immunoglobulin superfamily DCC subclass member 3        |
| IGDCC4   | immunoglobulin superfamily DCC subclass member 4        |
| IGF1     | insulin like growth factor 1                            |
| IGF1R    | insulin like growth factor 1 receptor                   |
| IGF2BP1  | insulin like growth factor 2 mRNA binding protein 1     |
| IGF2BP2  | insulin like growth factor 2 mRNA binding protein 2     |
| IGF2BP3  | insulin like growth factor 2 mRNA binding protein 3     |
| IGFL1    | IGF like family member 1                                |
| IGHMBP2  | immunoglobulin mu DNA binding protein 2                 |
| IGLON5   | IgLON family member 5                                   |
| IGSF1    | immunoglobulin superfamily member 1                     |
| IGSF10   | immunoglobulin superfamily member 10                    |
| IGSF3    | immunoglobulin superfamily member 3                     |
| IKBKB    | inhibitor of nuclear factor kappa B kinase subunit beta |
| IKZF2    | IKAROS family zinc finger 2                             |
| IKZF4    | IKAROS family zinc finger 4                             |
| IL10     | interleukin 10                                          |
| IL10RB   | interleukin 10 receptor subunit beta                    |
| IL11RA   | interleukin 11 receptor subunit alpha                   |
| IL12RB2  | interleukin 12 receptor subunit beta 2                  |
| IL13     | interleukin 13                                          |
| IL18R1   | interleukin 18 receptor 1                               |
| IL1A     | interleukin 1 alpha                                     |
| IL1RAPL2 | interleukin 1 receptor accessory protein like 2         |
| IL22RA1  | interleukin 22 receptor subunit alpha 1                 |
| IL2RA    | interleukin 2 receptor subunit alpha                    |
| IL36G    | interleukin 36 gamma                                    |
| IL6R     | interleukin 6 receptor                                  |
| ILDR2    | immunoglobulin like domain containing receptor 2        |

|         |                                                     |
|---------|-----------------------------------------------------|
| IMPACT  | impact RWD domain protein                           |
| IMPDH1  | inosine monophosphate dehydrogenase 1               |
| IMPG2   | interphotoreceptor matrix proteoglycan 2            |
| ING2    | inhibitor of growth family member 2                 |
| ING3    | inhibitor of growth family member 3                 |
| ING5    | inhibitor of growth family member 5                 |
| INHBB   | inhibin subunit beta B                              |
| INMT    | indolethylamine N-methyltransferase                 |
| INO80D  | INO80 complex subunit D                             |
| INPP5F  | inositol polyphosphate-5-phosphatase F              |
| INSIG2  | insulin induced gene 2                              |
| INSL4   | insulin like 4                                      |
| INSM2   | INSM transcriptional repressor 2                    |
| INSR    | insulin receptor                                    |
| INTS2   | integrator complex subunit 2                        |
| INTS6   | integrator complex subunit 6                        |
| INTS8   | integrator complex subunit 8                        |
| IP6K3   | inositol hexakisphosphate kinase 3                  |
| IPO7    | importin 7                                          |
| IPPK    | inositol-pentakisphosphate 2-kinase                 |
| IQCB1   | IQ motif containing B1                              |
| IRF1    | interferon regulatory factor 1                      |
| IRF2BPL | interferon regulatory factor 2 binding protein like |
| IRF4    | interferon regulatory factor 4                      |
| IRGQ    | immunity related GTPase Q                           |
| IRS1    | insulin receptor substrate 1                        |
| IRS2    | insulin receptor substrate 2                        |
| IRX4    | iroquois homeobox 4                                 |
| ISM1    | isthmin 1                                           |
| ITCH    | itchy E3 ubiquitin protein ligase                   |
| ITFG2   | integrin alpha FG-GAP repeat containing 2           |
| ITGA1   | integrin subunit alpha 1                            |

|         |                                                         |
|---------|---------------------------------------------------------|
| ITGA10  | integrin subunit alpha 10                               |
| ITGA4   | integrin subunit alpha 4                                |
| ITGA7   | integrin subunit alpha 7                                |
| ITGA8   | integrin subunit alpha 8                                |
| ITGAV   | integrin subunit alpha V                                |
| ITGB1   | integrin subunit beta 1                                 |
| ITGB3   | integrin subunit beta 3                                 |
| ITGB6   | integrin subunit beta 6                                 |
| ITGB8   | integrin subunit beta 8                                 |
| ITK     | IL2 inducible T cell kinase                             |
| ITM2B   | integral membrane protein 2B                            |
| ITPK1   | inositol-tetrakisphosphate 1-kinase                     |
| ITPR2   | inositol 1,4,5-trisphosphate receptor type 2            |
| ITSN1   | intersectin 1                                           |
| IYD     | iodotyrosine deiodinase                                 |
| JAK1    | Janus kinase 1                                          |
| JAKMIP2 | janus kinase and microtubule interacting protein 2      |
| JAKMIP3 | Janus kinase and microtubule interacting protein 3      |
| JARID2  | jumonji and AT-rich interaction domain containing 2     |
| JAZF1   | JAZF zinc finger 1                                      |
| JDP2    | Jun dimerization protein 2                              |
| JKAMP   | JNK1/MAPK8 associated membrane protein                  |
| JMY     | junction mediating and regulatory protein, p53 cofactor |
| JOSD1   | Josephin domain containing 1                            |
| JOSD2   | Josephin domain containing 2                            |
| JPH4    | junctionophilin 4                                       |
| JUN     | Jun proto-oncogene, AP-1 transcription factor subunit   |
| JUNB    | JunB proto-oncogene, AP-1 transcription factor subunit  |
| KANK3   | KN motif and ankyrin repeat domains 3                   |
| KANK4   | KN motif and ankyrin repeat domains 4                   |
| KAT2B   | lysine acetyltransferase 2B                             |
| KAT6A   | lysine acetyltransferase 6A                             |



|         |                                                                           |
|---------|---------------------------------------------------------------------------|
| KAT6B   | lysine acetyltransferase 6B                                               |
| KATNAL1 | katanin catalytic subunit A1 like 1                                       |
| KATNBL1 | katanin regulatory subunit B1 like 1                                      |
| KBTBD6  | kelch repeat and BTB domain containing 6                                  |
| KCMF1   | potassium channel modulatory factor 1                                     |
| KCNA4   | potassium voltage-gated channel subfamily A member 4                      |
| KCNA5   | potassium voltage-gated channel subfamily A member 5                      |
| KCNA6   | potassium voltage-gated channel subfamily A member 6                      |
| KCNB1   | potassium voltage-gated channel subfamily B member 1                      |
| KCNC1   | potassium voltage-gated channel subfamily C member 1                      |
| KCNC2   | potassium voltage-gated channel subfamily C member 2                      |
| KCND2   | potassium voltage-gated channel subfamily D member 2                      |
| KCNE3   | potassium voltage-gated channel subfamily E regulatory subunit 3          |
| KCNIP3  | potassium voltage-gated channel interacting protein 3                     |
| KCNIP4  | potassium voltage-gated channel interacting protein 4                     |
| KCNJ10  | potassium voltage-gated channel subfamily J member 10                     |
| KCNJ12  | potassium voltage-gated channel subfamily J member 12                     |
| KCNJ13  | potassium voltage-gated channel subfamily J member 13                     |
| KCNJ15  | potassium voltage-gated channel subfamily J member 15                     |
| KCNJ2   | potassium voltage-gated channel subfamily J member 2                      |
| KCNJ3   | potassium voltage-gated channel subfamily J member 3                      |
| KCNK1   | potassium two pore domain channel subfamily K member 1                    |
| KCNK12  | potassium two pore domain channel subfamily K member 12                   |
| KCNK5   | potassium two pore domain channel subfamily K member 5                    |
| KCNMB1  | potassium calcium-activated channel subfamily M regulatory beta subunit 1 |
| KCNMB2  | potassium calcium-activated channel subfamily M regulatory beta subunit 2 |
| KCNQ4   | potassium voltage-gated channel subfamily Q member 4                      |
| KCNS2   | potassium voltage-gated channel modifier subfamily S member 2             |
| KCNT1   | potassium sodium-activated channel subfamily T member 1                   |
| KCTD10  | potassium channel tetramerization domain containing 10                    |
| KCTD14  | potassium channel tetramerization domain containing 14                    |
| KCTD16  | potassium channel tetramerization domain containing 16                    |

|           |                                                                    |
|-----------|--------------------------------------------------------------------|
| KCTD17    | potassium channel tetramerization domain containing 17             |
| KCTD18    | potassium channel tetramerization domain containing 18             |
| KCTD19    | potassium channel tetramerization domain containing 19             |
| KCTD2     | potassium channel tetramerization domain containing 2              |
| KCTD21    | potassium channel tetramerization domain containing 21             |
| KCTD7     | potassium channel tetramerization domain containing 7              |
| KCTD8     | potassium channel tetramerization domain containing 8              |
| KCTD9     | potassium channel tetramerization domain containing 9              |
| KDELC1    | KDEL motif containing 1                                            |
| KDM3A     | lysine demethylase 3A                                              |
| KDM3B     | lysine demethylase 3B                                              |
| KDR       | kinase insert domain receptor                                      |
| KHDRBS1   | KH RNA binding domain containing, signal transduction associated 1 |
| KHK       | ketoheokinase                                                      |
| KHNYN     | KH and NYN domain containing                                       |
| KIAA0355  | KIAA0355                                                           |
| KIAA0754  | KIAA0754                                                           |
| KIAA0895  | KIAA0895                                                           |
| KIAA0930  | KIAA0930                                                           |
| KIAA1024  |                                                                    |
| KIAA1147  | KIAA1147                                                           |
| KIAA1328  | KIAA1328                                                           |
| KIAA1468  |                                                                    |
| KIAA1522  | KIAA1522                                                           |
| KIAA1549  | KIAA1549                                                           |
| KIAA1958  | KIAA1958                                                           |
| KIAA2013  | KIAA2013                                                           |
| KIDINS220 | kinase D interacting substrate 220                                 |
| KIF11     | kinesin family member 11                                           |
| KIF13A    | kinesin family member 13A                                          |
| KIF14     | kinesin family member 14                                           |
| KIF1B     | kinesin family member 1B                                           |

|         |                                     |
|---------|-------------------------------------|
| KIF24   | kinesin family member 24            |
| KIF2A   | kinesin family member 2A            |
| KIF3A   | kinesin family member 3A            |
| KIF3B   | kinesin family member 3B            |
| KIN     | Kin17 DNA and RNA binding protein   |
| KLF10   | Kruppel like factor 10              |
| KLF11   | Kruppel like factor 11              |
| KLF12   | Kruppel like factor 12              |
| KLF13   | Kruppel like factor 13              |
| KLF3    | Kruppel like factor 3               |
| KLF4    | Kruppel like factor 4               |
| KLF8    | Kruppel like factor 8               |
| KLF9    | Kruppel like factor 9               |
| KLHDC8B | kelch domain containing 8B          |
| KLHL14  | kelch like family member 14         |
| KLHL15  | kelch like family member 15         |
| KLHL18  | kelch like family member 18         |
| KLHL2   | kelch like family member 2          |
| KLHL20  | kelch like family member 20         |
| KLHL23  | kelch like family member 23         |
| KLHL28  | kelch like family member 28         |
| KLHL3   | kelch like family member 3          |
| KLHL31  | kelch like family member 31         |
| KLHL34  | kelch like family member 34         |
| KLHL42  | kelch like family member 42         |
| KLHL5   | kelch like family member 5          |
| KLHL6   | kelch like family member 6          |
| KLRF1   | killer cell lectin like receptor F1 |
| KMT2A   | lysine methyltransferase 2A         |
| KMT2C   | lysine methyltransferase 2C         |
| KMT2D   | lysine methyltransferase 2D         |
| KMT2E   | lysine methyltransferase 2E         |

|          |                                                               |
|----------|---------------------------------------------------------------|
| KPNA1    | karyopherin subunit alpha 1                                   |
| KPNA3    | karyopherin subunit alpha 3                                   |
| KPNA4    | karyopherin subunit alpha 4                                   |
| KPNA5    | karyopherin subunit alpha 5                                   |
| KPNA6    | karyopherin subunit alpha 6                                   |
| KRAS     | KRAS proto-oncogene, GTPase                                   |
| KREMEN1  | kringle containing transmembrane protein 1                    |
| KRT5     | keratin 5                                                     |
| KRT77    | keratin 77                                                    |
| KSR2     | kinase suppressor of ras 2                                    |
| KXD1     | KxDL motif containing 1                                       |
| KYNU     | kynureninase                                                  |
| LAMA1    | laminin subunit alpha 1                                       |
| LAMC1    | laminin subunit gamma 1                                       |
| LAMC2    | laminin subunit gamma 2                                       |
| LAPTM4A  | lysosomal protein transmembrane 4 alpha                       |
| LARP4    | La ribonucleoprotein domain family member 4                   |
| LARP4B   | La ribonucleoprotein domain family member 4B                  |
| LASP1    | LIM and SH3 protein 1                                         |
| LBR      | lamin B receptor                                              |
| LCA5     | LCA5, lebercilin                                              |
| LCLAT1   | lysocardiolipin acyltransferase 1                             |
| LCOR     | ligand dependent nuclear receptor corepressor                 |
| LCORL    | ligand dependent nuclear receptor corepressor like            |
| LCP1     | lymphocyte cytosolic protein 1                                |
| LCP2     | lymphocyte cytosolic protein 2                                |
| LDHC     | lactate dehydrogenase C                                       |
| LEF1     | lymphoid enhancer binding factor 1                            |
| LEMD2    | LEM domain containing 2                                       |
| LEPROTL1 | leptin receptor overlapping transcript like 1                 |
| LETM2    | leucine zipper and EF-hand containing transmembrane protein 2 |
| LGI1     | leucine rich glioma inactivated 1                             |

|        |                                                             |
|--------|-------------------------------------------------------------|
| LGR4   | leucine rich repeat containing G protein-coupled receptor 4 |
| LHFPL2 | LHFPL tetraspan subfamily member 2                          |
| LHX6   | LIM homeobox 6                                              |
| LHX8   | LIM homeobox 8                                              |
| LHX9   | LIM homeobox 9                                              |
| LIFR   | LIF receptor alpha                                          |
| LILRA6 | leukocyte immunoglobulin like receptor A6                   |
| LIMCH1 | LIM and calponin homology domains 1                         |
| LIMD1  | LIM domains containing 1                                    |
| LIMD2  | LIM domain containing 2                                     |
| LIMS1  | LIM zinc finger domain containing 1                         |
| LIN28A | lin-28 homolog A                                            |
| LIN28B | lin-28 homolog B                                            |
| LIN7C  | lin-7 homolog C, crumbs cell polarity complex component     |
| LINGO1 | leucine rich repeat and Ig domain containing 1              |
| LIPH   | lipase H                                                    |
| LIPI   | lipase I                                                    |
| LIX1   | limb and CNS expressed 1                                    |
| LMAN1  | lectin, mannose binding 1                                   |
| LMBR1  | limb development membrane protein 1                         |
| LMBR1L | limb development membrane protein 1 like                    |
| LMBRD2 | LMBR1 domain containing 2                                   |
| LMLN   | leishmanolysin like peptidase                               |
| LMO3   | LIM domain only 3                                           |
| LMO4   | LIM domain only 4                                           |
| LMO7   | LIM domain 7                                                |
| LMOD3  | leiomodin 3                                                 |
| LMX1A  | LIM homeobox transcription factor 1 alpha                   |
| LONRF1 | LON peptidase N-terminal domain and ring finger 1           |
| LONRF2 | LON peptidase N-terminal domain and ring finger 2           |
| LOR    | loricrin                                                    |
| LOX    | lysyl oxidase                                               |

|         |                                                                      |
|---------|----------------------------------------------------------------------|
| LOXL2   | lysyl oxidase like 2                                                 |
| LOXL3   | lysyl oxidase like 3                                                 |
| LOXL4   | lysyl oxidase like 4                                                 |
| LPAR1   | lysophosphatidic acid receptor 1                                     |
| LPCAT2  | lysophosphatidylcholine acyltransferase 2                            |
| LPGAT1  | lysophosphatidylglycerol acyltransferase 1                           |
| LRAT    | lecithin retinol acyltransferase                                     |
| LRCH1   | leucine rich repeats and calponin homology domain containing 1       |
| LRCH2   | leucine rich repeats and calponin homology domain containing 2       |
| LRFN2   | leucine rich repeat and fibronectin type III domain containing 2     |
| LRGUK   | leucine rich repeats and guanylate kinase domain containing          |
| LRIG1   | leucine rich repeats and immunoglobulin like domains 1               |
| LRIG2   | leucine rich repeats and immunoglobulin like domains 2               |
| LRP1B   | LDL receptor related protein 1B                                      |
| LRP4    | LDL receptor related protein 4                                       |
| LRP6    | LDL receptor related protein 6                                       |
| LRP8    | LDL receptor related protein 8                                       |
| LRR1    | leucine rich repeat protein 1                                        |
| LRRC17  | leucine rich repeat containing 17                                    |
| LRRC19  | leucine rich repeat containing 19                                    |
| LRRC2   | leucine rich repeat containing 2                                     |
| LRRC23  | leucine rich repeat containing 23                                    |
| LRRC40  | leucine rich repeat containing 40                                    |
| LRRC58  | leucine rich repeat containing 58                                    |
| LRRC59  | leucine rich repeat containing 59                                    |
| LRRC8A  | leucine rich repeat containing 8 VRAC subunit A                      |
| LRRC8B  | leucine rich repeat containing 8 VRAC subunit B                      |
| LRRC8C  | leucine rich repeat containing 8 VRAC subunit C                      |
| LRRC8D  | leucine rich repeat containing 8 VRAC subunit D                      |
| LRRFIP1 | LRR binding FLII interacting protein 1                               |
| LRTM2   | leucine rich repeats and transmembrane domains 2                     |
| LRTOMT  | leucine rich transmembrane and O-methyltransferase domain containing |

|         |                                                                      |
|---------|----------------------------------------------------------------------|
| LSM11   | LSM11, U7 small nuclear RNA associated                               |
| LSM12   | LSM12 homolog                                                        |
| LSMEM1  | leucine rich single-pass membrane protein 1                          |
| LTN1    | listerin E3 ubiquitin protein ligase 1                               |
| LUC7L3  | LUC7 like 3 pre-mRNA splicing factor                                 |
| LYN     | LYN proto-oncogene, Src family tyrosine kinase                       |
| LYPD6   | LY6/PLAUR domain containing 6                                        |
| LYRM2   | LYR motif containing 2                                               |
| LYRM7   | LYR motif containing 7                                               |
| LYSMD3  | LysM domain containing 3                                             |
| LYVE1   | lymphatic vessel endothelial hyaluronan receptor 1                   |
| M1AP    | meiosis 1 associated protein                                         |
| MAB21L1 | mab-21 like 1                                                        |
| MAB21L3 | mab-21 like 3                                                        |
| MACF1   | microtubule-actin crosslinking factor 1                              |
| MAEA    | macrophage erythroblast attacher                                     |
| MAFG    | MAF bZIP transcription factor G                                      |
| MAGEA3  | MAGE family member A3                                                |
| MAGEC1  | MAGE family member C1                                                |
| MAGI2   | membrane associated guanylate kinase, WW and PDZ domain containing 2 |
| MAGOHB  | mago homolog B, exon junction complex subunit                        |
| MAGT1   | magnesium transporter 1                                              |
| MAMDC2  | MAM domain containing 2                                              |
| MAML1   | mastermind like transcriptional coactivator 1                        |
| MAML2   | mastermind like transcriptional coactivator 2                        |
| MAMLD1  | mastermind like domain containing 1                                  |
| MAN1A2  | mannosidase alpha class 1A member 2                                  |
| MAN1C1  | mannosidase alpha class 1C member 1                                  |
| MAN2A2  | mannosidase alpha class 2A member 2                                  |
| MAP10   | microtubule associated protein 10                                    |
| MAP1B   | microtubule associated protein 1B                                    |
| MAP2    | microtubule associated protein 2                                     |

|           |                                                               |
|-----------|---------------------------------------------------------------|
| MAP3K1    | mitogen-activated protein kinase kinase kinase 1              |
| MAP3K12   | mitogen-activated protein kinase kinase kinase 12             |
| MAP3K13   | mitogen-activated protein kinase kinase kinase 13             |
| MAP3K2    | mitogen-activated protein kinase kinase kinase 2              |
| MAP3K5    | mitogen-activated protein kinase kinase kinase 5              |
| MAP3K9    | mitogen-activated protein kinase kinase kinase 9              |
| MAP4K2    | mitogen-activated protein kinase kinase kinase kinase 2       |
| MAP4K3    | mitogen-activated protein kinase kinase kinase kinase 3       |
| MAP4K4    | mitogen-activated protein kinase kinase kinase kinase 4       |
| MAP4K5    | mitogen-activated protein kinase kinase kinase kinase 5       |
| MAP7      | microtubule associated protein 7                              |
| MAP9      | microtubule associated protein 9                              |
| MAPK1     | mitogen-activated protein kinase 1                            |
| MAPK1IP1L | mitogen-activated protein kinase 1 interacting protein 1 like |
| MAPK6     | mitogen-activated protein kinase 6                            |
| MAPK8     | mitogen-activated protein kinase 8                            |
| MAPK9     | mitogen-activated protein kinase 9                            |
| MAPRE1    | microtubule associated protein RP/EB family member 1          |
| MAPRE3    | microtubule associated protein RP/EB family member 3          |
| MARK3     | microtubule affinity regulating kinase 3                      |
| MARS2     | methionyl-tRNA synthetase 2, mitochondrial                    |
| MASP1     | mannan binding lectin serine peptidase 1                      |
| MAST3     | microtubule associated serine/threonine kinase 3              |
| MAT2A     | methionine adenosyltransferase 2A                             |
| MATN1     | matrilin 1                                                    |
| MATR3     | matrin 3                                                      |
| MAU2      | MAU2 sister chromatid cohesion factor                         |
| MB21D2    | Mab-21 domain containing 2                                    |
| MBD1      | methyl-CpG binding domain protein 1                           |
| MBD2      | methyl-CpG binding domain protein 2                           |
| MBD6      | methyl-CpG binding domain protein 6                           |
| MBLAC2    | metallo-beta-lactamase domain containing 2                    |



|          |                                                       |
|----------|-------------------------------------------------------|
| MBNL1    | muscleblind like splicing regulator 1                 |
| MBNL2    | muscleblind like splicing regulator 2                 |
| MBNL3    | muscleblind like splicing regulator 3                 |
| MBOAT2   | membrane bound O-acyltransferase domain containing 2  |
| MBTD1    | mbt domain containing 1                               |
| MBTPS2   | membrane bound transcription factor peptidase, site 2 |
| MC2R     | melanocortin 2 receptor                               |
| MCC      | MCC, WNT signaling pathway regulator                  |
| MCF2L    | MCF.2 cell line derived transforming sequence like    |
| MCFD2    | multiple coagulation factor deficiency 2              |
| MCHR1    | melanin concentrating hormone receptor 1              |
| MCOLN2   | mucolipin 2                                           |
| MDM4     | MDM4, p53 regulator                                   |
| MECOM    | MDS1 and EVI1 complex locus                           |
| MECP2    | methyl-CpG binding protein 2                          |
| MED12L   | mediator complex subunit 12 like                      |
| MED13L   | mediator complex subunit 13 like                      |
| MED23    | mediator complex subunit 23                           |
| MED28    | mediator complex subunit 28                           |
| MED31    | mediator complex subunit 31                           |
| MED6     | mediator complex subunit 6                            |
| MED8     | mediator complex subunit 8                            |
| MEF2C    | myocyte enhancer factor 2C                            |
| MEF2D    | myocyte enhancer factor 2D                            |
| MEIS2    | Meis homeobox 2                                       |
| MEOX2    | mesenchyme homeobox 2                                 |
| MET      | MET proto-oncogene, receptor tyrosine kinase          |
| METAP1   | methionyl aminopeptidase 1                            |
| METAP2   | methionyl aminopeptidase 2                            |
| METTL21A | methyltransferase like 21A                            |
| METTL9   | methyltransferase like 9                              |
| MEX3A    | mex-3 RNA binding family member A                     |

|        |                                                                             |
|--------|-----------------------------------------------------------------------------|
| MEX3B  | mex-3 RNA binding family member B                                           |
| MEX3C  | mex-3 RNA binding family member C                                           |
| MFAP3L | microfibril associated protein 3 like                                       |
| MFAP5  | microfibril associated protein 5                                            |
| MFN2   | mitofusin 2                                                                 |
| MFSD11 | major facilitator superfamily domain containing 11                          |
| MFSD12 | major facilitator superfamily domain containing 12                          |
| MFSD8  | major facilitator superfamily domain containing 8                           |
| MGA    | MGA, MAX dimerization protein                                               |
| MGAT2  | mannosyl (alpha-1,6-)-glycoprotein beta-1,2-N-acetylglucosaminyltransferase |
| MGAT4A | alpha-1,3-mannosyl-glycoprotein 4-beta-N-acetylglucosaminyltransferase A    |
| MIA3   | MIA SH3 domain ER export factor 3                                           |
| MIB1   | mindbomb E3 ubiquitin protein ligase 1                                      |
| MICAL1 | microtubule associated monooxygenase, calponin and LIM domain containing 1  |
| MICB   | MHC class I polypeptide-related sequence B                                  |
| MIER1  | MIER1 transcriptional regulator                                             |
| MIER2  | MIER family member 2                                                        |
| MIER3  | MIER family member 3                                                        |
| MINK1  | misshapen like kinase 1                                                     |
| MINOS1 | mitochondrial inner membrane organizing system 1                            |
| MINPP1 | multiple inositol-polyphosphate phosphatase 1                               |
| MIOX   | myo-inositol oxygenase                                                      |
| MIS12  | MIS12, kinetochore complex component                                        |
| MKL1   | Megakaryoblastic Leukemia (Translocation) 1                                 |
| MKL2   | MKL1/Myocardin Like 2                                                       |
| MKLN1  | Muskelin 1                                                                  |
| MKNK2  | MAP Kinase Interacting Serine/Threonine Kinase 2                            |
| MKRN3  | makorin ring finger protein 3                                               |
| MKX    | mohawk homeobox                                                             |
| MLANA  | melan-A                                                                     |
| MLIP   | muscular LMNA interacting protein                                           |
| MLLT10 | MLLT10, histone lysine methyltransferase DOT1L cofactor                     |

|         |                                                          |
|---------|----------------------------------------------------------|
| MLXIP   | MLX interacting protein                                  |
| MMD     | monocyte to macrophage differentiation associated        |
| MMD2    | monocyte to macrophage differentiation associated 2      |
| MMP1    | matrix metallopeptidase 1                                |
| MMP11   | matrix metallopeptidase 11                               |
| MMP16   | matrix metallopeptidase 16                               |
| MMP2    | matrix metallopeptidase 2                                |
| MMP21   | matrix metallopeptidase 21                               |
| MMP8    | matrix metallopeptidase 8                                |
| MMRN1   | multimerin 1                                             |
| MMS22L  | MMS22 like, DNA repair protein                           |
| MNT     | MAX network transcriptional repressor                    |
| MXN1    | motor neuron and pancreas homeobox 1                     |
| MOB3B   | MOB kinase activator 3B                                  |
| MOB4    | MOB family member 4, phocein                             |
| MOG     | myelin oligodendrocyte glycoprotein                      |
| MON2    | MON2 homolog, regulator of endosome-to-Golgi trafficking |
| MORC2   | MORC family CW-type zinc finger 2                        |
| MOXD1   | monooxygenase DBH like 1                                 |
| MPLKIP  | M-phase specific PLK1 interacting protein                |
| MPP5    | membrane palmitoylated protein 5                         |
| MPP7    | membrane palmitoylated protein 7                         |
| MPV17L  | MPV17 mitochondrial inner membrane protein like          |
| MPZ     | myelin protein zero                                      |
| MPZL2   | myelin protein zero like 2                               |
| MRO     | maestro                                                  |
| MRPL1   | mitochondrial ribosomal protein L1                       |
| MRPS25  | mitochondrial ribosomal protein S25                      |
| MRS2    | magnesium transporter MRS2                               |
| MS4A1   | membrane spanning 4-domains A1                           |
| MS4A7   | membrane spanning 4-domains A7                           |
| MSANTD2 | Myb/SANT DNA binding domain containing 2                 |

|         |                                                                                                      |
|---------|------------------------------------------------------------------------------------------------------|
| MSANTD4 | Myb/SANT DNA binding domain containing 4 with coiled-coils                                           |
| MSI2    | musashi RNA binding protein 2                                                                        |
| MSL2    | MSL complex subunit 2                                                                                |
| MSMO1   | methylsterol monooxygenase 1                                                                         |
| MSN     | moesin                                                                                               |
| MSR1    | macrophage scavenger receptor 1                                                                      |
| MSS51   | MSS51 mitochondrial translational activator                                                          |
| MSTN    | myostatin                                                                                            |
| MT1H    | metallothionein 1H                                                                                   |
| MTAP    | methylthioadenosine phosphorylase                                                                    |
| MTBP    | MDM2 binding protein                                                                                 |
| MTCP1   | mature T cell proliferation 1                                                                        |
| MTDH    | metadherin                                                                                           |
| MTF2    | metal response element binding transcription factor 2                                                |
| MTHFD2  | methylenetetrahydrofolate dehydrogenase (NADP+ dependent) 2, methenyltetrahydrofolate cyclohydrolase |
| MTM1    | myotubularin 1                                                                                       |
| MTMR12  | myotubularin related protein 12                                                                      |
| MTMR3   | myotubularin related protein 3                                                                       |
| MTMR4   | myotubularin related protein 4                                                                       |
| MTMR9   | myotubularin related protein 9                                                                       |
| MTPN    | myotrophin                                                                                           |
| MTR     | 5-methyltetrahydrofolate-homocysteine methyltransferase                                              |
| MTSS1L  | MTSS1L, I-BAR domain containing                                                                      |
| MTTP    | microsomal triglyceride transfer protein                                                             |
| MTUS1   | microtubule associated scaffold protein 1                                                            |
| MTX2    | metaxin 2                                                                                            |
| MTX3    | metaxin 3                                                                                            |
| MUC1    | mucin 1, cell surface associated                                                                     |
| MUC17   | mucin 17, cell surface associated                                                                    |
| MUC20   | mucin 20, cell surface associated                                                                    |
| MXD1    | MAX dimerization protein 1                                                                           |
| MXD4    | MAX dimerization protein 4                                                                           |

|          |                                                                    |
|----------|--------------------------------------------------------------------|
| MXI1     | MAX interactor 1, dimerization protein                             |
| MYB      | MYB proto-oncogene, transcription factor                           |
| MYBL2    | MYB proto-oncogene like 2                                          |
| MYCBP    | MYC binding protein                                                |
| MYCBP2   | MYC binding protein 2, E3 ubiquitin protein ligase                 |
| MYCN     | MYCN proto-oncogene, bHLH transcription factor                     |
| MYH10    | myosin heavy chain 10                                              |
| MYO18A   | myosin XVIII A                                                     |
| MYO1F    | myosin IF                                                          |
| MYO1H    | myosin IH                                                          |
| MYO5B    | myosin VB                                                          |
| MYO6     | myosin VI                                                          |
| MYOCD    | myocardin                                                          |
| MYOZ2    | myozenin 2                                                         |
| MYRF     | myelin regulatory factor                                           |
| MYT1     | myelin transcription factor 1                                      |
| MZT1     | mitotic spindle organizing protein 1                               |
| N4BP2    | NEDD4 binding protein 2                                            |
| NAA15    | N(alpha)-acetyltransferase 15, NatA auxiliary subunit              |
| NAA30    | N(alpha)-acetyltransferase 30, NatC catalytic subunit              |
| NAA50    | N(alpha)-acetyltransferase 50, NatE catalytic subunit              |
| NAALADL2 | N-acetylated alpha-linked acidic dipeptidase like 2                |
| NAB1     | NGFI-A binding protein 1                                           |
| NABP1    | nucleic acid binding protein 1                                     |
| NADK     | NAD kinase                                                         |
| NAGPA    | N-acetylglucosamine-1-phosphodiester alpha-N-acetylglucosaminidase |
| NAMPT    | nicotinamide phosphoribosyltransferase                             |
| NANOS1   | nanos C2HC-type zinc finger 1                                      |
| NANOS2   | nanos C2HC-type zinc finger 2                                      |
| NANP     | N-acetylneuraminic acid phosphatase                                |
| NAP1L1   | nucleosome assembly protein 1 like 1                               |
| NAP1L2   | nucleosome assembly protein 1 like 2                               |

|         |                                                                                                |
|---------|------------------------------------------------------------------------------------------------|
| NAP1L5  | nucleosome assembly protein 1 like 5                                                           |
| NAPG    | NSF attachment protein gamma                                                                   |
| NBEA    | neurobeachin                                                                                   |
| NBR1    | NBR1, autophagy cargo receptor                                                                 |
| NCEH1   | neutral cholesterol ester hydrolase 1                                                          |
| NCK2    | NCK adaptor protein 2                                                                          |
| NCKAP5  | NCK associated protein 5                                                                       |
| NCL     | nucleolin                                                                                      |
| NCOA1   | nuclear receptor coactivator 1                                                                 |
| NCOA2   | nuclear receptor coactivator 2                                                                 |
| NCOA3   | nuclear receptor coactivator 3                                                                 |
| NCOA7   | nuclear receptor coactivator 7                                                                 |
| NCOR2   | nuclear receptor corepressor 2                                                                 |
| NCR3LG1 | natural killer cell cytotoxicity receptor 3 ligand 1                                           |
| NDEL1   | nudE neurodevelopment protein 1 like 1                                                         |
| NDFIP2  | Nedd4 family interacting protein 2                                                             |
| NDN     | necdin, MAGE family member                                                                     |
| NDRG2   | NDRG family member 2                                                                           |
| NDRG3   | NDRG family member 3                                                                           |
| NDRG4   | NDRG family member 4                                                                           |
| NDST2   | N-deacetylase and N-sulfotransferase 2                                                         |
| NDST3   | N-deacetylase and N-sulfotransferase 3                                                         |
| NDUFA4  | NDUFA4, mitochondrial complex associated                                                       |
| NDUFA5  | NADH:ubiquinone oxidoreductase subunit A5                                                      |
| NDUFC2  | NADH:ubiquinone oxidoreductase subunit C2                                                      |
| NDUFS1  | NADH:ubiquinone oxidoreductase core subunit S1                                                 |
| NECAB1  | N-terminal EF-hand calcium binding protein 1                                                   |
| NECAP1  | NECAP endocytosis associated 1                                                                 |
| NEDD1   | neural precursor cell expressed, developmentally down-regulated 1                              |
| NEDD4   | neural precursor cell expressed, developmentally down-regulated 4, E3 ubiquitin protein ligase |
| NEFM    | neurofilament medium                                                                           |
| NEGR1   | neuronal growth regulator 1                                                                    |

|         |                                                    |
|---------|----------------------------------------------------|
| NEK1    | NIMA related kinase 1                              |
| NEK10   | NIMA related kinase 10                             |
| NEK7    | NIMA related kinase 7                              |
| NEK9    | NIMA related kinase 9                              |
| NEO1    | neogenin 1                                         |
| NET1    | neuroepithelial cell transforming 1                |
| NETO2   | neuropilin and tolloid like 2                      |
| NEURL1B | neuralized E3 ubiquitin protein ligase 1B          |
| NEURL4  | neuralized E3 ubiquitin protein ligase 4           |
| NEUROD1 | neuronal differentiation 1                         |
| NEUROD4 | neuronal differentiation 4                         |
| NEUROG1 | neurogenin 1                                       |
| NEUROG2 | neurogenin 2                                       |
| NFASC   | neurofascin                                        |
| NFAT5   | nuclear factor of activated T cells 5              |
| NFATC2  | nuclear factor of activated T cells 2              |
| NFATC3  | nuclear factor of activated T cells 3              |
| NFIA    | nuclear factor I A                                 |
| NFIB    | nuclear factor I B                                 |
| NFYA    | nuclear transcription factor Y subunit alpha       |
| NGF     | nerve growth factor                                |
| NHLH2   | nescient helix-loop-helix 2                        |
| NHLRC2  | NHL repeat containing 2                            |
| NHLRC3  | NHL repeat containing 3                            |
| NHS     | NHS actin remodeling regulator                     |
| NICN1   | nicolin 1                                          |
| NINJ1   | ninjurin 1                                         |
| NIPA1   | NIPA magnesium transporter 1                       |
| NIPAL2  | NIPA like domain containing 2                      |
| NIPAL4  | NIPA like domain containing 4                      |
| NKAIN2  | sodium/potassium transporting ATPase interacting 2 |
| NKD1    | naked cuticle homolog 1                            |

|        |                                               |
|--------|-----------------------------------------------|
| NKX2-2 | NK2 homeobox 2                                |
| NKX3-2 | NK3 homeobox 2                                |
| NLGN1  | neuroligin 1                                  |
| NLGN4X | neuroligin 4 X-linked                         |
| NLK    | nemo like kinase                              |
| NLN    | neurolysin                                    |
| NLRP11 | NLR family pyrin domain containing 11         |
| NME4   | NME/NM23 nucleoside diphosphate kinase 4      |
| NME6   | NME/NM23 nucleoside diphosphate kinase 6      |
| NME9   | NME/NM23 family member 9                      |
| NMNAT1 | nicotinamide nucleotide adenylyltransferase 1 |
| NMT1   | N-myristoyltransferase 1                      |
| NMT2   | N-myristoyltransferase 2                      |
| NNT    | nicotinamide nucleotide transhydrogenase      |
| NOG    | noggin                                        |
| NOTCH3 | notch 3                                       |
| NOVA1  | NOVA alternative splicing regulator 1         |
| NPAP1  | nuclear pore associated protein 1             |
| NPEPL1 | aminopeptidase like 1                         |
| NPY1R  | neuropeptide Y receptor Y1                    |
| NPY2R  | neuropeptide Y receptor Y2                    |
| NR1D2  | nuclear receptor subfamily 1 group D member 2 |
| NR2F2  | nuclear receptor subfamily 2 group F member 2 |
| NR4A2  | nuclear receptor subfamily 4 group A member 2 |
| NR4A3  | nuclear receptor subfamily 4 group A member 3 |
| NR5A2  | nuclear receptor subfamily 5 group A member 2 |
| NR6A1  | nuclear receptor subfamily 6 group A member 1 |
| NRAS   | NRAS proto-oncogene, GTPase                   |
| NRBF2  | nuclear receptor binding factor 2             |
| NRBP1  | nuclear receptor binding protein 1            |
| NRK    | Nik related kinase                            |
| NRP1   | neuropilin 1                                  |



|        |                                                               |
|--------|---------------------------------------------------------------|
| NRXN1  | neurexin 1                                                    |
| NRXN3  | neurexin 3                                                    |
| NSD1   | nuclear receptor binding SET domain protein 1                 |
| NSMAF  | neutral sphingomyelinase activation associated factor         |
| NSUN5  | NOP2/Sun RNA methyltransferase family member 5                |
| NT5C2  | 5'-nucleotidase, cytosolic II                                 |
| NT5C3B | 5'-nucleotidase, cytosolic IIIB                               |
| NT5DC1 | 5'-nucleotidase domain containing 1                           |
| NT5E   | 5'-nucleotidase ecto                                          |
| NTF3   | neurotrophin 3                                                |
| NTN4   | netrin 4                                                      |
| NTNG1  | netrin G1                                                     |
| NTRK2  | neurotrophic receptor tyrosine kinase 2                       |
| NTRK3  | neurotrophic receptor tyrosine kinase 3                       |
| NUAK2  | NUAK family kinase 2                                          |
| NUCKS1 | nuclear casein kinase and cyclin dependent kinase substrate 1 |
| NUDT11 | nudix hydrolase 11                                            |
| NUDT4  | nudix hydrolase 4                                             |
| NUFIP2 | nuclear FMR1 interacting protein 2                            |
| NUMBL  | NUMB like, endocytic adaptor protein                          |
| NUP153 | nucleoporin 153                                               |
| NUP155 | nucleoporin 155                                               |
| NUS1   | NUS1, dehydrodolichyl diphosphate synthase subunit            |
| NWD1   | NACHT and WD repeat domain containing 1                       |
| NXT2   | nuclear transport factor 2 like export factor 2               |
| NYNRIN | NYN domain and retroviral integrase containing                |
| OARD1  | O-acyl-ADP-ribose deacylase 1                                 |
| OAS2   | 2'-5'-oligoadenylate synthetase 2                             |
| OAT    | ornithine aminotransferase                                    |
| OCLN   | occludin                                                      |
| ODF2L  | outer dense fiber of sperm tails 2 like                       |
| OGT    | O-linked N-acetylglucosamine (GlcNAc) transferase             |

|         |                                                           |
|---------|-----------------------------------------------------------|
| OLFM4   | olfactomedin 4                                            |
| OLFML2A | olfactomedin like 2A                                      |
| OMG     | oligodendrocyte myelin glycoprotein                       |
| ONECUT2 | one cut homeobox 2                                        |
| ONECUT3 | one cut homeobox 3                                        |
| OPCML   | opioid binding protein/cell adhesion molecule like        |
| OR11A1  | olfactory receptor family 11 subfamily A member 1         |
| OR7D2   | olfactory receptor family 7 subfamily D member 2          |
| ORC2    | origin recognition complex subunit 2                      |
| ORC6    | origin recognition complex subunit 6                      |
| ORMDL3  | ORMDL sphingolipid biosynthesis regulator 3               |
| OSBP    | oxysterol binding protein                                 |
| OSBPL11 | oxysterol binding protein like 11                         |
| OSBPL2  | oxysterol binding protein like 2                          |
| OSBPL3  | oxysterol binding protein like 3                          |
| OSBPL5  | oxysterol binding protein like 5                          |
| OSBPL7  | oxysterol binding protein like 7                          |
| OSGIN2  | oxidative stress induced growth inhibitor family member 2 |
| OSMR    | oncostatin M receptor                                     |
| OSTF1   | osteoclast stimulating factor 1                           |
| OSTM1   | osteoclastogenesis associated transmembrane protein 1     |
| OTOF    | otoferlin                                                 |
| OTOGL   | otogelin like                                             |
| OTUB2   | OTU deubiquitinase, ubiquitin aldehyde binding 2          |
| OTUD1   | OTU deubiquitinase 1                                      |
| OTUD4   | OTU deubiquitinase 4                                      |
| OTUD5   | OTU deubiquitinase 5                                      |
| OTUD6B  | OTU domain containing 6B                                  |
| OTX2    | orthodenticle homeobox 2                                  |
| OVOL1   | ovo like transcriptional repressor 1                      |
| OXCT1   | 3-oxoacid CoA-transferase 1                               |
| OXR1    | oxidation resistance 1                                    |

|           |                                                                      |
|-----------|----------------------------------------------------------------------|
| P2RY10    | P2Y receptor family member 10                                        |
| P2RY13    | purinergic receptor P2Y13                                            |
| P4HA1     | prolyl 4-hydroxylase subunit alpha 1                                 |
| P4HA2     | prolyl 4-hydroxylase subunit alpha 2                                 |
| P4HA3     | prolyl 4-hydroxylase subunit alpha 3                                 |
| PAAF1     | proteasomal ATPase associated factor 1                               |
| PABPC1L2A | poly(A) binding protein cytoplasmic 1 like 2A                        |
| PABPC1L2B | poly(A) binding protein cytoplasmic 1 like 2B                        |
| PAFAH1B2  | platelet activating factor acetylhydrolase 1b catalytic subunit 2    |
| PAFAH2    | platelet activating factor acetylhydrolase 2                         |
| PAG1      | phosphoprotein membrane anchor with glycosphingolipid microdomains 1 |
| PAIP2     | poly(A) binding protein interacting protein 2                        |
| PAK1      | p21 (RAC1) activated kinase 1                                        |
| PALD1     | phosphatase domain containing, paladin 1                             |
| PALLD     | palladin, cytoskeletal associated protein                            |
| PALM3     | paralemmin 3                                                         |
| PAM       | peptidylglycine alpha-amidating monooxygenase                        |
| PANK3     | pantothenate kinase 3                                                |
| PAPD4     |                                                                      |
| PAPD5     |                                                                      |
| PAPOLA    | poly(A) polymerase alpha                                             |
| PAPOLB    | poly(A) polymerase beta                                              |
| PAPPA     | pappalysin 1                                                         |
| PAQR5     | progesterone and adipoQ receptor family member 5                     |
| PARD6B    | par-6 family cell polarity regulator beta                            |
| PARM1     | prostate androgen-regulated mucin-like protein 1                     |
| PARP11    | poly(ADP-ribose) polymerase family member 11                         |
| PARP14    | poly(ADP-ribose) polymerase family member 14                         |
| PARP16    | poly(ADP-ribose) polymerase family member 16                         |
| PARP6     | poly(ADP-ribose) polymerase family member 6                          |
| PARS2     | prolyl-tRNA synthetase 2, mitochondrial                              |
| PARVB     | parvin beta                                                          |

|         |                                                   |
|---------|---------------------------------------------------|
| PATE4   | prostate and testis expressed 4                   |
| PATL1   | PAT1 homolog 1, processing body mRNA decay factor |
| PAWR    | pro-apoptotic WT1 regulator                       |
| PAX3    | paired box 3                                      |
| PAX7    | paired box 7                                      |
| PBRM1   | polybromo 1                                       |
| PBX1    | PBX homeobox 1                                    |
| PBX2    | PBX homeobox 2                                    |
| PBX3    | PBX homeobox 3                                    |
| PCBP4   | poly(rC) binding protein 4                        |
| PCDH11Y | protocadherin 11 Y-linked                         |
| PCDH17  | protocadherin 17                                  |
| PCDH18  | protocadherin 18                                  |
| PCDH19  | protocadherin 19                                  |
| PCDH20  | protocadherin 20                                  |
| PCDH8   | protocadherin 8                                   |
| PCDHA1  | protocadherin alpha 1                             |
| PCDHA10 | protocadherin alpha 10                            |
| PCDHA11 | protocadherin alpha 11                            |
| PCDHA12 | protocadherin alpha 12                            |
| PCDHA13 | protocadherin alpha 13                            |
| PCDHA2  | protocadherin alpha 2                             |
| PCDHA3  | protocadherin alpha 3                             |
| PCDHA4  | protocadherin alpha 4                             |
| PCDHA5  | protocadherin alpha 5                             |
| PCDHA6  | protocadherin alpha 6                             |
| PCDHA7  | protocadherin alpha 7                             |
| PCDHA8  | protocadherin alpha 8                             |
| PCDHA9  | protocadherin alpha 9                             |
| PCDHAC1 | protocadherin alpha subfamily C, 1                |
| PCDHAC2 | protocadherin alpha subfamily C, 2                |
| PCGF3   | polycomb group ring finger 3                      |

|         |                                                                              |
|---------|------------------------------------------------------------------------------|
| PCGF5   | polycomb group ring finger 5                                                 |
| PCMTD1  | protein-L-isoaspartate (D-aspartate) O-methyltransferase domain containing 1 |
| PCMTD2  | protein-L-isoaspartate (D-aspartate) O-methyltransferase domain containing 2 |
| PCNA    | proliferating cell nuclear antigen                                           |
| PCNP    | PEST proteolytic signal containing nuclear protein                           |
| PCSK2   | proprotein convertase subtilisin/kexin type 2                                |
| PCTP    | phosphatidylcholine transfer protein                                         |
| PCYOX1L | prenylcysteine oxidase 1 like                                                |
| PDCD10  | programmed cell death 10                                                     |
| PDCD2L  | programmed cell death 2 like                                                 |
| PDCD4   | programmed cell death 4                                                      |
| PDE12   | phosphodiesterase 12                                                         |
| PDE2A   | phosphodiesterase 2A                                                         |
| PDE4B   | phosphodiesterase 4B                                                         |
| PDE4D   | phosphodiesterase 4D                                                         |
| PDE5A   | phosphodiesterase 5A                                                         |
| PDE7A   | phosphodiesterase 7A                                                         |
| PDGFA   | platelet derived growth factor subunit A                                     |
| PDGFRA  | platelet derived growth factor receptor alpha                                |
| PDHX    | pyruvate dehydrogenase complex component X                                   |
| PDIA3   | protein disulfide isomerase family A member 3                                |
| PDIK1L  | PDLIM1 interacting kinase 1 like                                             |
| PDK4    | pyruvate dehydrogenase kinase 4                                              |
| PDP2    | pyruvate dehydrogenase phosphatase catalytic subunit 2                       |
| PDPR    | pyruvate dehydrogenase phosphatase regulatory subunit                        |
| PDXK    | pyridoxal kinase                                                             |
| PDZD9   | PDZ domain containing 9                                                      |
| PEG10   | paternally expressed 10                                                      |
| PELO    | pelota mRNA surveillance and ribosome rescue factor                          |
| PEX11B  | peroxisomal biogenesis factor 11 beta                                        |
| PEX5L   | peroxisomal biogenesis factor 5 like                                         |
| PFAS    | phosphoribosylformylglycinamide synthase                                     |

|         |                                                         |
|---------|---------------------------------------------------------|
| PFDN1   | prefoldin subunit 1                                     |
| PFDN4   | prefoldin subunit 4                                     |
| PFKFB3  | 6-phosphofructo-2-kinase/fructose-2,6-biphosphatase 3   |
| PFN2    | profilin 2                                              |
| PFN4    | profilin family member 4                                |
| PGAP1   | post-GPI attachment to proteins 1                       |
| PGAP2   | post-GPI attachment to proteins 2                       |
| PGBD2   | piggyBac transposable element derived 2                 |
| PGBD5   | piggyBac transposable element derived 5                 |
| PGD     | phosphogluconate dehydrogenase                          |
| PGM1    | phosphoglucomutase 1                                    |
| PGM2    | phosphoglucomutase 2                                    |
| PGM2L1  | phosphoglucomutase 2 like 1                             |
| PGM3    | phosphoglucomutase 3                                    |
| PGP     | phosphoglycolate phosphatase                            |
| PGPEP1  | pyroglutamyl-peptidase I                                |
| PGRMC1  | progesterone receptor membrane component 1              |
| PHACTR2 | phosphatase and actin regulator 2                       |
| PHACTR3 | phosphatase and actin regulator 3                       |
| PHAX    | phosphorylated adaptor for RNA export                   |
| PHC2    | polyhomeotic homolog 2                                  |
| PHC3    | polyhomeotic homolog 3                                  |
| PHF21B  | PHD finger protein 21B                                  |
| PHF6    | PHD finger protein 6                                    |
| PHIP    | pleckstrin homology domain interacting protein          |
| PHLDB2  | pleckstrin homology like domain family B member 2       |
| PHLPP1  | PH domain and leucine rich repeat protein phosphatase 1 |
| PHLPP2  | PH domain and leucine rich repeat protein phosphatase 2 |
| PHOX2A  | paired like homeobox 2A                                 |
| PHTF2   | putative homeodomain transcription factor 2             |
| PI15    | peptidase inhibitor 15                                  |
| PI4K2B  | phosphatidylinositol 4-kinase type 2 beta               |

|          |                                                                                 |
|----------|---------------------------------------------------------------------------------|
| PICALM   | phosphatidylinositol binding clathrin assembly protein                          |
| PIEZO2   | piezo type mechanosensitive ion channel component 2                             |
| PIGA     | phosphatidylinositol glycan anchor biosynthesis class A                         |
| PIGF     | phosphatidylinositol glycan anchor biosynthesis class F                         |
| PIGM     | phosphatidylinositol glycan anchor biosynthesis class M                         |
| PIGX     | phosphatidylinositol glycan anchor biosynthesis class X                         |
| PIH1D3   | PIH1 domain containing 3                                                        |
| PIK3C2A  | phosphatidylinositol-4-phosphate 3-kinase catalytic subunit type 2 alpha        |
| PIK3C2B  | phosphatidylinositol-4-phosphate 3-kinase catalytic subunit type 2 beta         |
| PIK3CA   | phosphatidylinositol-4,5-bisphosphate 3-kinase catalytic subunit alpha          |
| PIK3IP1  | phosphoinositide-3-kinase interacting protein 1                                 |
| PIM1     | Pim-1 proto-oncogene, serine/threonine kinase                                   |
| PIM2     | Pim-2 proto-oncogene, serine/threonine kinase                                   |
| PIN1     | peptidylprolyl cis/trans isomerase, NIMA-interacting 1                          |
| PIP4K2A  | phosphatidylinositol-5-phosphate 4-kinase type 2 alpha                          |
| PIRT     | phosphoinositide interacting regulator of transient receptor potential channels |
| PITPNA   | phosphatidylinositol transfer protein alpha                                     |
| PITPNB   | phosphatidylinositol transfer protein beta                                      |
| PITPNC1  | phosphatidylinositol transfer protein cytoplasmic 1                             |
| PITPNM2  | phosphatidylinositol transfer protein membrane associated 2                     |
| PKD1     | polycystin 1, transient receptor potential channel interacting                  |
| PKD2     | polycystin 2, transient receptor potential cation channel                       |
| PKHD1    | PKHD1, fibrocystin/polyductin                                                   |
| PKIA     | cAMP-dependent protein kinase inhibitor alpha                                   |
| PKN2     | protein kinase N2                                                               |
| PLA2G12A | phospholipase A2 group XIIA                                                     |
| PLA2G2C  | phospholipase A2 group IIC                                                      |
| PLA2G2F  | phospholipase A2 group IIF                                                      |
| PLA2G3   | phospholipase A2 group III                                                      |
| PLA2G4E  | phospholipase A2 group IVE                                                      |
| PLAG1    | PLAG1 zinc finger                                                               |
| PLAGL2   | PLAG1 like zinc finger 2                                                        |

|         |                                                                     |
|---------|---------------------------------------------------------------------|
| PLBD2   | phospholipase B domain containing 2                                 |
| PLCB4   | phospholipase C beta 4                                              |
| PLCD4   | phospholipase C delta 4                                             |
| PLCG1   | phospholipase C gamma 1                                             |
| PLCL1   | phospholipase C like 1 (inactive)                                   |
| PLCXD3  | phosphatidylinositol specific phospholipase C X domain containing 3 |
| PLD5    | phospholipase D family member 5                                     |
| PLEKHA3 | pleckstrin homology domain containing A3                            |
| PLEKHA7 | pleckstrin homology domain containing A7                            |
| PLEKHA8 | pleckstrin homology domain containing A8                            |
| PLEKHB2 | pleckstrin homology domain containing B2                            |
| PLEKHG2 | pleckstrin homology and RhoGEF domain containing G2                 |
| PLEKHG6 | pleckstrin homology and RhoGEF domain containing G6                 |
| PLEKHG7 | pleckstrin homology and RhoGEF domain containing G7                 |
| PLEKHH1 | pleckstrin homology, MyTH4 and FERM domain containing H1            |
| PLEKHO1 | pleckstrin homology domain containing O1                            |
| PLEKHO2 | pleckstrin homology domain containing O2                            |
| PLGLB1  | plasminogen-like B1                                                 |
| PLGLB2  | plasminogen-like B2                                                 |
| PLGRKT  | plasminogen receptor with a C-terminal lysine                       |
| PLLP    | plasmolipin                                                         |
| PLS3    | plastin 3                                                           |
| PLXNA1  | plexin A1                                                           |
| PLXNA2  | plexin A2                                                           |
| PLXNA4  | plexin A4                                                           |
| PLXNC1  | plexin C1                                                           |
| PM20D2  | peptidase M20 domain containing 2                                   |
| PMAIP1  | phorbol-12-myristate-13-acetate-induced protein 1                   |
| PMM1    | phosphomannomutase 1                                                |
| PMP2    | peripheral myelin protein 2                                         |
| PNKD    | PNKD, MBL domain containing                                         |
| PNMA1   | PNMA family member 1                                                |



|              |                                                    |
|--------------|----------------------------------------------------|
| PN01         | partner of NOB1 homolog                            |
| PNP          | purine nucleoside phosphorylase                    |
| PNPLA1       | patatin like phospholipase domain containing 1     |
| PNRC2        | proline rich nuclear receptor coactivator 2        |
| POC1B-GALNT4 | POC1B-GALNT4 readthrough                           |
| POF1B        | POF1B, actin binding protein                       |
| POGK         | pogo transposable element derived with KRAB domain |
| POGZ         | pogo transposable element derived with ZNF domain  |
| POLD3        | DNA polymerase delta 3, accessory subunit          |
| POLE         | DNA polymerase epsilon, catalytic subunit          |
| POLE3        | DNA polymerase epsilon 3, accessory subunit        |
| POLQ         | DNA polymerase theta                               |
| POLR1D       | RNA polymerase I and III subunit D                 |
| POLR2D       | RNA polymerase II subunit D                        |
| POLR2G       | RNA polymerase II subunit G                        |
| POLR2J3      | RNA polymerase II subunit J3                       |
| POLR3G       | RNA polymerase III subunit G                       |
| PON2         | paraoxonase 2                                      |
| POP1         | POP1 homolog, ribonuclease P/MRP subunit           |
| PORCN        | porcupine O-acyltransferase                        |
| POTEE        | POTE ankyrin domain family member E                |
| POU2F1       | POU class 2 homeobox 1                             |
| POU2F2       | POU class 2 homeobox 2                             |
| POU6F1       | POU class 6 homeobox 1                             |
| POU6F2       | POU class 6 homeobox 2                             |
| PPARA        | peroxisome proliferator activated receptor alpha   |
| PPARG        | peroxisome proliferator activated receptor gamma   |
| PPARGC1A     | PPARG coactivator 1 alpha                          |
| PPARGC1B     | PPARG coactivator 1 beta                           |
| PPFIA1       | PTPRF interacting protein alpha 1                  |
| PPFIBP1      | PPFIA binding protein 1                            |
| PPHLN1       | periphilin 1                                       |

|          |                                                                      |
|----------|----------------------------------------------------------------------|
| PPIB     | peptidylprolyl isomerase B                                           |
| PPIL2    | peptidylprolyl isomerase like 2                                      |
| PPIL3    | peptidylprolyl isomerase like 3                                      |
| PPIL4    | peptidylprolyl isomerase like 4                                      |
| PPM1F    | protein phosphatase, Mg <sup>2+</sup> /Mn <sup>2+</sup> dependent 1F |
| PPP1CB   | protein phosphatase 1 catalytic subunit beta                         |
| PPP1R12B | protein phosphatase 1 regulatory subunit 12B                         |
| PPP1R14C | protein phosphatase 1 regulatory inhibitor subunit 14C               |
| PPP1R16B | protein phosphatase 1 regulatory subunit 16B                         |
| PPP1R18  | protein phosphatase 1 regulatory subunit 18                          |
| PPP2CA   | protein phosphatase 2 catalytic subunit alpha                        |
| PPP2R2A  | protein phosphatase 2 regulatory subunit Balpha                      |
| PPP2R2B  | protein phosphatase 2 regulatory subunit Bbeta                       |
| PPP2R3C  | protein phosphatase 2 regulatory subunit B"gamma                     |
| PPP3CA   | protein phosphatase 3 catalytic subunit alpha                        |
| PPP3CB   | protein phosphatase 3 catalytic subunit beta                         |
| PPP3R1   | protein phosphatase 3 regulatory subunit B, alpha                    |
| PPP3R2   | protein phosphatase 3 regulatory subunit B, beta                     |
| PPP4C    | protein phosphatase 4 catalytic subunit                              |
| PPP4R1   | protein phosphatase 4 regulatory subunit 1                           |
| PPP4R2   | protein phosphatase 4 regulatory subunit 2                           |
| PPP6C    | protein phosphatase 6 catalytic subunit                              |
| PPP6R1   | protein phosphatase 6 regulatory subunit 1                           |
| PPP6R2   | protein phosphatase 6 regulatory subunit 2                           |
| PPP6R3   | protein phosphatase 6 regulatory subunit 3                           |
| PPT1     | palmitoyl-protein thioesterase 1                                     |
| PPT2     | palmitoyl-protein thioesterase 2                                     |
| PPTC7    | PTC7 protein phosphatase homolog                                     |
| PPWD1    | peptidylprolyl isomerase domain and WD repeat containing 1           |
| PQLC2    | PQ loop repeat containing 2                                          |
| PRDM1    | PR/SET domain 1                                                      |
| PRDM12   | PR/SET domain 12                                                     |

|         |                                                                |
|---------|----------------------------------------------------------------|
| PRDM13  | PR/SET domain 13                                               |
| PRDM16  | PR/SET domain 16                                               |
| PRDM2   | PR/SET domain 2                                                |
| PRDM5   | PR/SET domain 5                                                |
| PREB    | prolactin regulatory element binding                           |
| PRG4    | proteoglycan 4                                                 |
| PRKAA1  | protein kinase AMP-activated catalytic subunit alpha 1         |
| PRKAA2  | protein kinase AMP-activated catalytic subunit alpha 2         |
| PRKAB2  | protein kinase AMP-activated non-catalytic subunit beta 2      |
| PRKACB  | protein kinase cAMP-activated catalytic subunit beta           |
| PRKAR2A | protein kinase cAMP-dependent type II regulatory subunit alpha |
| PRKAR2B | protein kinase cAMP-dependent type II regulatory subunit beta  |
| PRKCD   | protein kinase C delta                                         |
| PRKCE   | protein kinase C epsilon                                       |
| PRKCQ   | protein kinase C theta                                         |
| PRMT3   | protein arginine methyltransferase 3                           |
| PROK2   | prokineticin 2                                                 |
| PROP1   | PROP paired-like homeobox 1                                    |
| PRPF38B | pre-mRNA processing factor 38B                                 |
| PRPF40A | pre-mRNA processing factor 40 homolog A                        |
| PRR15   | proline rich 15                                                |
| PRR18   | proline rich 18                                                |
| PRR22   | proline rich 22                                                |
| PRR23A  | proline rich 23A                                               |
| PRR9    | proline rich 9                                                 |
| PRRC2C  | proline rich coiled-coil 2C                                    |
| PRRG1   | proline rich and Gla domain 1                                  |
| PRRG4   | proline rich and Gla domain 4                                  |
| PRRT2   | proline rich transmembrane protein 2                           |
| PRRX1   | paired related homeobox 1                                      |
| PRTG    | protogenin                                                     |
| PSAP    | prosaposin                                                     |

|         |                                                             |
|---------|-------------------------------------------------------------|
| PSAT1   | phosphoserine aminotransferase 1                            |
| PSD3    | pleckstrin and Sec7 domain containing 3                     |
| PSIP1   | PC4 and SFRS1 interacting protein 1                         |
| PSKH1   | protein serine kinase H1                                    |
| PSME4   | proteasome activator subunit 4                              |
| PSPH    | phosphoserine phosphatase                                   |
| PSTK    | phosphoseryl-tRNA kinase                                    |
| PSTPIP2 | proline-serine-threonine phosphatase interacting protein 2  |
| PTAFR   | platelet activating factor receptor                         |
| PTAR1   | protein prenyltransferase alpha subunit repeat containing 1 |
| PTBP1   | polypyrimidine tract binding protein 1                      |
| PTBP2   | polypyrimidine tract binding protein 2                      |
| PTCH1   | patched 1                                                   |
| PTCHD4  | patched domain containing 4                                 |
| PTDSS1  | phosphatidylserine synthase 1                               |
| PTEN    | phosphatase and tensin homolog                              |
| PTGER3  | prostaglandin E receptor 3                                  |
| PTGER4  | prostaglandin E receptor 4                                  |
| PTGFRN  | prostaglandin F2 receptor inhibitor                         |
| PTGS2   | prostaglandin-endoperoxide synthase 2                       |
| PTMA    | prothymosin alpha                                           |
| PTP4A1  | protein tyrosine phosphatase type IVA, member 1             |
| PTPDC1  | protein tyrosine phosphatase domain containing 1            |
| PTPN12  | protein tyrosine phosphatase, non-receptor type 12          |
| PTPN13  | protein tyrosine phosphatase, non-receptor type 13          |
| PTPN18  | protein tyrosine phosphatase, non-receptor type 18          |
| PTPN21  | protein tyrosine phosphatase, non-receptor type 21          |
| PTPN3   | protein tyrosine phosphatase, non-receptor type 3           |
| PTPN4   | protein tyrosine phosphatase, non-receptor type 4           |
| PTPRD   | protein tyrosine phosphatase, receptor type D               |
| PTPRG   | protein tyrosine phosphatase, receptor type G               |
| PTPRK   | protein tyrosine phosphatase, receptor type K               |

|           |                                                |
|-----------|------------------------------------------------|
| PTPRO     | protein tyrosine phosphatase, receptor type O  |
| PTPRT     | protein tyrosine phosphatase, receptor type T  |
| PTPRZ1    | protein tyrosine phosphatase, receptor type Z1 |
| PUM2      | pumilio RNA binding family member 2            |
| PURA      | purine rich element binding protein A          |
| PURB      | purine rich element binding protein B          |
| PURG      | purine rich element binding protein G          |
| PUS7L     | pseudouridine synthase 7 like                  |
| PXDN      | peroxidasin                                    |
| PXT1      | peroxisomal testis enriched protein 1          |
| PYCR1     | pyrroline-5-carboxylate reductase 1            |
| PYGO2     | pygopus family PHD finger 2                    |
| QARS      | glutaminyl-tRNA synthetase                     |
| QKI       | QKI, KH domain containing RNA binding          |
| R3HDM1    | R3H domain containing 1                        |
| RAB11FIP1 | RAB11 family interacting protein 1             |
| RAB11FIP2 | RAB11 family interacting protein 2             |
| RAB11FIP5 | RAB11 family interacting protein 5             |
| RAB14     | RAB14, member RAS oncogene family              |
| RAB15     | RAB15, member RAS oncogene family              |
| RAB18     | RAB18, member RAS oncogene family              |
| RAB21     | RAB21, member RAS oncogene family              |
| RAB22A    | RAB22A, member RAS oncogene family             |
| RAB23     | RAB23, member RAS oncogene family              |
| RAB27B    | RAB27B, member RAS oncogene family             |
| RAB2B     | RAB2B, member RAS oncogene family              |
| RAB31     | RAB31, member RAS oncogene family              |
| RAB32     | RAB32, member RAS oncogene family              |
| RAB33B    | RAB33B, member RAS oncogene family             |
| RAB35     | RAB35, member RAS oncogene family              |
| RAB37     | RAB37, member RAS oncogene family              |
| RAB38     | RAB38, member RAS oncogene family              |

|          |                                                                 |
|----------|-----------------------------------------------------------------|
| RAB3D    | RAB3D, member RAS oncogene family                               |
| RAB3GAP2 | RAB3 GTPase activating non-catalytic protein subunit 2          |
| RAB3IP   | RAB3A interacting protein                                       |
| RAB43    | RAB43, member RAS oncogene family                               |
| RAB5A    | RAB5A, member RAS oncogene family                               |
| RAB7A    | RAB7A, member RAS oncogene family                               |
| RAB8A    | RAB8A, member RAS oncogene family                               |
| RAB8B    | RAB8B, member RAS oncogene family                               |
| RABEPK   | Rab9 effector protein with kelch motifs                         |
| RABGAP1L | RAB GTPase activating protein 1 like                            |
| RAD23B   | RAD23 homolog B, nucleotide excision repair protein             |
| RAD54B   | RAD54 homolog B                                                 |
| RAD9A    | RAD9 checkpoint clamp component A                               |
| RAG1     | recombination activating 1                                      |
| RALB     | RAS like proto-oncogene B                                       |
| RALGDS   | ral guanine nucleotide dissociation stimulator                  |
| RALGPS1  | Ral GEF with PH domain and SH3 binding motif 1                  |
| RALYL    | RALY RNA binding protein like                                   |
| RANBP10  | RAN binding protein 10                                          |
| RANBP17  | RAN binding protein 17                                          |
| RANBP2   | RAN binding protein 2                                           |
| RANBP9   | RAN binding protein 9                                           |
| RANGRF   | RAN guanine nucleotide release factor                           |
| RAP1A    | RAP1A, member of RAS oncogene family                            |
| RAP1B    | RAP1B, member of RAS oncogene family                            |
| RAP2B    | RAP2B, member of RAS oncogene family                            |
| RAP2C    | RAP2C, member of RAS oncogene family                            |
| RAPGEF2  | Rap guanine nucleotide exchange factor 2                        |
| RAPGEF4  | Rap guanine nucleotide exchange factor 4                        |
| RAPH1    | Ras association (RalGDS/AF-6) and pleckstrin homology domains 1 |
| RARB     | retinoic acid receptor beta                                     |
| RARG     | retinoic acid receptor gamma                                    |

|         |                                                            |
|---------|------------------------------------------------------------|
| RARRES1 | retinoic acid receptor responder 1                         |
| RASA1   | RAS p21 protein activator 1                                |
| RASGRF2 | Ras protein specific guanine nucleotide releasing factor 2 |
| RASGRP1 | RAS guanyl releasing protein 1                             |
| RASL11B | RAS like family 11 member B                                |
| RASSF2  | Ras association domain family member 2                     |
| RASSF6  | Ras association domain family member 6                     |
| RASSF8  | Ras association domain family member 8                     |
| RAVER2  | ribonucleoprotein, PTB binding 2                           |
| RB1     | RB transcriptional corepressor 1                           |
| RBBP9   | RB binding protein 9, serine hydrolase                     |
| RBFOX1  | RNA binding fox-1 homolog 1                                |
| RBFOX2  | RNA binding fox-1 homolog 2                                |
| RBFOX3  | RNA binding fox-1 homolog 3                                |
| RBM12   | RNA binding motif protein 12                               |
| RBM12B  | RNA binding motif protein 12B                              |
| RBM24   | RNA binding motif protein 24                               |
| RBM38   | RNA binding motif protein 38                               |
| RBM43   | RNA binding motif protein 43                               |
| RBM46   | RNA binding motif protein 46                               |
| RBM47   | RNA binding motif protein 47                               |
| RBM48   | RNA binding motif protein 48                               |
| RBMS1   | RNA binding motif single stranded interacting protein 1    |
| RBMXL2  | RBMX like 2                                                |
| RC3H1   | ring finger and CCCH-type domains 1                        |
| RCAN2   | regulator of calcineurin 2                                 |
| RCBTB1  | RCC1 and BTB domain containing protein 1                   |
| RCN1    | reticulocalbin 1                                           |
| RCN2    | reticulocalbin 2                                           |
| RDH10   | retinol dehydrogenase 10                                   |
| RDH14   | retinol dehydrogenase 14                                   |
| RDX     | radixin                                                    |

|        |                                                                         |
|--------|-------------------------------------------------------------------------|
| RECK   | reversion inducing cysteine rich protein with kazal motifs              |
| REEP1  | receptor accessory protein 1                                            |
| REEP3  | receptor accessory protein 3                                            |
| REEP4  | receptor accessory protein 4                                            |
| RELN   | reelin                                                                  |
| REPIN1 | replication initiator 1                                                 |
| REPS2  | RALBP1 associated Eps domain containing 2                               |
| REST   | RE1 silencing transcription factor                                      |
| REV1   | REV1, DNA directed polymerase                                           |
| REV3L  | REV3 like, DNA directed polymerase zeta catalytic subunit               |
| RFC3   | replication factor C subunit 3                                          |
| RFFL   | ring finger and FYVE like domain containing E3 ubiquitin protein ligase |
| RFTN2  | raftlin family member 2                                                 |
| RFWD3  | ring finger and WD repeat domain 3                                      |
| RFX2   | regulatory factor X2                                                    |
| RFX6   | regulatory factor X6                                                    |
| RGL1   | ral guanine nucleotide dissociation stimulator like 1                   |
| RGMB   | repulsive guidance molecule BMP co-receptor b                           |
| RGS16  | regulator of G protein signaling 16                                     |
| RGS22  | regulator of G protein signaling 22                                     |
| RGS4   | regulator of G protein signaling 4                                      |
| RGS7   | regulator of G protein signaling 7                                      |
| RGS7BP | regulator of G protein signaling 7 binding protein                      |
| RHD    | Rh blood group D antigen                                                |
| RHEBL1 | RHEB like 1                                                             |
| RHOB   | ras homolog family member B                                             |
| RHOQ   | ras homolog family member Q                                             |
| RHOT1  | ras homolog family member T1                                            |
| RHOU   | ras homolog family member U                                             |
| RHPN2  | rhophilin Rho GTPase binding protein 2                                  |
| RICTOR | RPTOR independent companion of MTOR complex 2                           |
| RIMBP2 | RIMS binding protein 2                                                  |



|          |                                                          |
|----------|----------------------------------------------------------|
| RIMKLA   | ribosomal modification protein rimK like family member A |
| RIMKLB   | ribosomal modification protein rimK like family member B |
| RIMS1    | regulating synaptic membrane exocytosis 1                |
| RIMS2    | regulating synaptic membrane exocytosis 2                |
| RIMS3    | regulating synaptic membrane exocytosis 3                |
| RIOK3    | RIO kinase 3                                             |
| RIT2     | Ras like without CAAX 2                                  |
| RLIM     | ring finger protein, LIM domain interacting              |
| RMDN2    | regulator of microtubule dynamics 2                      |
| RMDN3    | regulator of microtubule dynamics 3                      |
| RMI2     | RecQ mediated genome instability 2                       |
| RMND5A   | required for meiotic nuclear division 5 homolog A        |
| RNASEH2C | ribonuclease H2 subunit C                                |
| RND3     | Rho family GTPase 3                                      |
| RNF111   | ring finger protein 111                                  |
| RNF122   | ring finger protein 122                                  |
| RNF125   | ring finger protein 125                                  |
| RNF138   | ring finger protein 138                                  |
| RNF139   | ring finger protein 139                                  |
| RNF141   | ring finger protein 141                                  |
| RNF145   | ring finger protein 145                                  |
| RNF157   | ring finger protein 157                                  |
| RNF165   | ring finger protein 165                                  |
| RNF170   | ring finger protein 170                                  |
| RNF185   | ring finger protein 185                                  |
| RNF186   | ring finger protein 186                                  |
| RNF2     | ring finger protein 2                                    |
| RNF20    | ring finger protein 20                                   |
| RNF213   | ring finger protein 213                                  |
| RNF217   | ring finger protein 217                                  |
| RNF220   | ring finger protein 220                                  |
| RNF24    | ring finger protein 24                                   |

|         |                                                        |
|---------|--------------------------------------------------------|
| RNF31   | ring finger protein 31                                 |
| RNF38   | ring finger protein 38                                 |
| RNF44   | ring finger protein 44                                 |
| RNF6    | ring finger protein 6                                  |
| RNF8    | ring finger protein 8                                  |
| RNFT1   | ring finger protein, transmembrane 1                   |
| RNGTT   | RNA guanylyltransferase and 5'-phosphatase             |
| RNMT    | RNA guanine-7 methyltransferase                        |
| ROBO1   | roundabout guidance receptor 1                         |
| ROCK1   | Rho associated coiled-coil containing protein kinase 1 |
| ROGDI   | rogdi homolog                                          |
| ROR1    | receptor tyrosine kinase like orphan receptor 1        |
| RORA    | RAR related orphan receptor A                          |
| RORB    | RAR related orphan receptor B                          |
| RORC    | RAR related orphan receptor C                          |
| RP2     | RP2, ARL3 GTPase activating protein                    |
| RPA2    | replication protein A2                                 |
| RPAP2   | RNA polymerase II associated protein 2                 |
| RPE     | ribulose-5-phosphate-3-epimerase                       |
| RPL10   | ribosomal protein L10                                  |
| RPL22L1 | ribosomal protein L22 like 1                           |
| RPL23   | ribosomal protein L23                                  |
| RPL26   | ribosomal protein L26                                  |
| RPL37   | ribosomal protein L37                                  |
| RPP25   | ribonuclease P and MRP subunit p25                     |
| RPRD1A  | regulation of nuclear pre-mRNA domain containing 1A    |
| RPRD2   | regulation of nuclear pre-mRNA domain containing 2     |
| RPS15A  | ribosomal protein S15a                                 |
| RPS6KA1 | ribosomal protein S6 kinase A1                         |
| RPS6KA2 | ribosomal protein S6 kinase A2                         |
| RPS6KA3 | ribosomal protein S6 kinase A3                         |
| RPS6KA6 | ribosomal protein S6 kinase A6                         |

|         |                                                                      |
|---------|----------------------------------------------------------------------|
| RPS6KB1 | ribosomal protein S6 kinase B1                                       |
| RPS6KB2 | ribosomal protein S6 kinase B2                                       |
| RRAD    | RRAD, Ras related glycolysis inhibitor and calcium channel regulator |
| RRAGD   | Ras related GTP binding D                                            |
| RRBP1   | ribosome binding protein 1                                           |
| RRM2    | ribonucleotide reductase regulatory subunit M2                       |
| RRP15   | ribosomal RNA processing 15 homolog                                  |
| RRP1B   | ribosomal RNA processing 1B                                          |
| RSBN1   | round spermatid basic protein 1                                      |
| RSBN1L  | round spermatid basic protein 1 like                                 |
| RSPO3   | R-spondin 3                                                          |
| RSPRY1  | ring finger and SPRY domain containing 1                             |
| RTKN2   | rhotekin 2                                                           |
| RTN1    | reticulon 1                                                          |
| RTN4R   | reticulon 4 receptor                                                 |
| RTTN    | rotatin                                                              |
| RUFY2   | RUN and FYVE domain containing 2                                     |
| RUFY3   | RUN and FYVE domain containing 3                                     |
| RUNDC3B | RUN domain containing 3B                                             |
| RUNX1T1 | RUNX1 translocation partner 1                                        |
| RUNX2   | runt related transcription factor 2                                  |
| RUSC2   | RUN and SH3 domain containing 2                                      |
| RWDD2A  | RWD domain containing 2A                                             |
| RWDD4   | RWD domain containing 4                                              |
| S100A7A | S100 calcium binding protein A7A                                     |
| S100A8  | S100 calcium binding protein A8                                      |
| S100PBP | S100P binding protein                                                |
| SACM1L  | SAC1 like phosphatidylinositide phosphatase                          |
| SACS    | sacsin molecular chaperone                                           |
| SAMD12  | sterile alpha motif domain containing 12                             |
| SAMSN1  | SAM domain, SH3 domain and nuclear localization signals 1            |
| SAP130  | Sin3A associated protein 130                                         |

|         |                                                          |
|---------|----------------------------------------------------------|
| SAR1B   | secretion associated Ras related GTPase 1B               |
| SARNP   | SAP domain containing ribonucleoprotein                  |
| SASS6   | SAS-6 centriolar assembly protein                        |
| SBK1    | SH3 domain binding kinase 1                              |
| SBNO1   | strawberry notch homolog 1                               |
| SCAF4   | SR-related CTD associated factor 4                       |
| SCARA5  | scavenger receptor class A member 5                      |
| SCARF1  | scavenger receptor class F member 1                      |
| SCD     | stearoyl-CoA desaturase                                  |
| SCHIP1  | schwannomin interacting protein 1                        |
| SCML1   | Scm polycomb group protein like 1                        |
| SCML2   | Scm polycomb group protein like 2                        |
| SCML4   | Scm polycomb group protein like 4                        |
| SCN1A   | sodium voltage-gated channel alpha subunit 1             |
| SCN2A   | sodium voltage-gated channel alpha subunit 2             |
| SCN3A   | sodium voltage-gated channel alpha subunit 3             |
| SCN3B   | sodium voltage-gated channel beta subunit 3              |
| SCN5A   | sodium voltage-gated channel alpha subunit 5             |
| SCN8A   | sodium voltage-gated channel alpha subunit 8             |
| SCN9A   | sodium voltage-gated channel alpha subunit 9             |
| SCOC    | short coiled-coil protein                                |
| SCRT2   | scratch family transcriptional repressor 2               |
| SCYL2   | SCY1 like pseudokinase 2                                 |
| SCYL3   | SCY1 like pseudokinase 3                                 |
| SDAD1   | SDA1 domain containing 1                                 |
| SDR42E1 | short chain dehydrogenase/reductase family 42E, member 1 |
| SEC22A  | SEC22 homolog A, vesicle trafficking protein             |
| SEC22C  | SEC22 homolog C, vesicle trafficking protein             |
| SEC23A  | Sec23 homolog A, coat complex II component               |
| SEC23IP | SEC23 interacting protein                                |
| SEC24C  | SEC24 homolog C, COPII coat complex component            |
| SEC31A  | SEC31 homolog A, COPII coat complex component            |

|           |                                                   |
|-----------|---------------------------------------------------|
| SEC61A2   | Sec61 translocon alpha 2 subunit                  |
| SEC62     | SEC62 homolog, preprotein translocation factor    |
| SEC63     | SEC63 homolog, protein translocation regulator    |
| SECISBP2L | SECIS binding protein 2 like                      |
| SELP      | selectin P                                        |
| SEMA3A    | semaphorin 3A                                     |
| SEMA3F    | semaphorin 3F                                     |
| SEMA4B    | semaphorin 4B                                     |
| SEMA4C    | semaphorin 4C                                     |
| SEMA4G    | semaphorin 4G                                     |
| SEMA5A    | semaphorin 5A                                     |
| SEMA6A    | semaphorin 6A                                     |
| SEMA6D    | semaphorin 6D                                     |
| SEN2      | SUMO specific peptidase 2                         |
| SEN5      | SUMO specific peptidase 5                         |
| SEN7      | SUMO specific peptidase 7                         |
| SERBP1    | SERPINE1 mRNA binding protein 1                   |
| SERINC1   | serine incorporator 1                             |
| SERINC3   | serine incorporator 3                             |
| SERP1     | stress associated endoplasmic reticulum protein 1 |
| SERPINA10 | serpin family A member 10                         |
| SERPINB9  | serpin family B member 9                          |
| SERPINI1  | serpin family I member 1                          |
| SERTAD2   | SERTA domain containing 2                         |
| SESN1     | sestrin 1                                         |
| SESTD1    | SEC14 and spectrin domain containing 1            |
| SETD3     | SET domain containing 3                           |
| SETD7     | SET domain containing lysine methyltransferase 7  |
| SETDB1    | SET domain bifurcated 1                           |
| SF3A1     | splicing factor 3a subunit 1                      |
| SFMBT1    | Scm like with four mbt domains 1                  |
| SFPQ      | splicing factor proline and glutamine rich        |

|          |                                                               |
|----------|---------------------------------------------------------------|
| SFR1     | SWI5 dependent homologous recombination repair protein 1      |
| SFSWAP   | splicing factor SWAP                                          |
| SFT2D2   | SFT2 domain containing 2                                      |
| SFTA3    | surfactant associated 3                                       |
| SFXN1    | sideroflexin 1                                                |
| SGCB     | sarcoglycan beta                                              |
| SGMS2    | sphingomyelin synthase 2                                      |
| SGPL1    | sphingosine-1-phosphate lyase 1                               |
| SGPP1    | sphingosine-1-phosphate phosphatase 1                         |
| SGTB     | small glutamine rich tetratricopeptide repeat containing beta |
| SH2B3    | SH2B adaptor protein 3                                        |
| SH2D4A   | SH2 domain containing 4A                                      |
| SH2D5    | SH2 domain containing 5                                       |
| SH3BGRL3 | SH3 domain binding glutamate rich protein like 3              |
| SH3GL1   | SH3 domain containing GRB2 like 1, endophilin A2              |
| SH3GLB1  | SH3 domain containing GRB2 like, endophilin B1                |
| SH3PXD2A | SH3 and PX domains 2A                                         |
| SH3PXD2B | SH3 and PX domains 2B                                         |
| SH3RF1   | SH3 domain containing ring finger 1                           |
| SH3TC1   | SH3 domain and tetratricopeptide repeats 1                    |
| SH3TC2   | SH3 domain and tetratricopeptide repeats 2                    |
| SH3YL1   | SH3 and SYLF domain containing 1                              |
| SHANK2   | SH3 and multiple ankyrin repeat domains 2                     |
| SHB      | SH2 domain containing adaptor protein B                       |
| SHC4     | SHC adaptor protein 4                                         |
| SHISA2   | shisa family member 2                                         |
| SHISA3   | shisa family member 3                                         |
| SHOC2    | SHOC2, leucine rich repeat scaffold protein                   |
| SIGLEC14 | sialic acid binding Ig like lectin 14                         |
| SIKE1    | suppressor of IKBKE 1                                         |
| SIM1     | SIM bHLH transcription factor 1                               |
| SIRT1    | sirtuin 1                                                     |

|          |                                                      |
|----------|------------------------------------------------------|
| SIX1     | SIX homeobox 1                                       |
| SIX3     | SIX homeobox 3                                       |
| SIX4     | SIX homeobox 4                                       |
| SKA2     | spindle and kinetochore associated complex subunit 2 |
| SKA3     | spindle and kinetochore associated complex subunit 3 |
| SKIDA1   | SKI/DACH domain containing 1                         |
| SKIL     | SKI like proto-oncogene                              |
| SKP2     | S-phase kinase associated protein 2                  |
| SLA2     | Src like adaptor 2                                   |
| SLAIN2   | SLAIN motif family member 2                          |
| SLAMF6   | SLAM family member 6                                 |
| SLC10A7  | solute carrier family 10 member 7                    |
| SLC11A1  | solute carrier family 11 member 1                    |
| SLC12A2  | solute carrier family 12 member 2                    |
| SLC12A5  | solute carrier family 12 member 5                    |
| SLC12A9  | solute carrier family 12 member 9                    |
| SLC13A1  | solute carrier family 13 member 1                    |
| SLC14A1  | solute carrier family 14 member 1 (Kidd blood group) |
| SLC15A5  | solute carrier family 15 member 5                    |
| SLC16A10 | solute carrier family 16 member 10                   |
| SLC16A14 | solute carrier family 16 member 14                   |
| SLC16A2  | solute carrier family 16 member 2                    |
| SLC16A6  | solute carrier family 16 member 6                    |
| SLC16A9  | solute carrier family 16 member 9                    |
| SLC17A7  | solute carrier family 17 member 7                    |
| SLC17A9  | solute carrier family 17 member 9                    |
| SLC19A2  | solute carrier family 19 member 2                    |
| SLC19A3  | solute carrier family 19 member 3                    |
| SLC1A2   | solute carrier family 1 member 2                     |
| SLC20A1  | solute carrier family 20 member 1                    |
| SLC22A14 | solute carrier family 22 member 14                   |
| SLC22A23 | solute carrier family 22 member 23                   |

|          |                                    |
|----------|------------------------------------|
| SLC22A5  | solute carrier family 22 member 5  |
| SLC24A1  | solute carrier family 24 member 1  |
| SLC24A2  | solute carrier family 24 member 2  |
| SLC24A4  | solute carrier family 24 member 4  |
| SLC25A16 | solute carrier family 25 member 16 |
| SLC25A18 | solute carrier family 25 member 18 |
| SLC25A20 | solute carrier family 25 member 20 |
| SLC25A22 | solute carrier family 25 member 22 |
| SLC25A24 | solute carrier family 25 member 24 |
| SLC25A25 | solute carrier family 25 member 25 |
| SLC25A27 | solute carrier family 25 member 27 |
| SLC25A30 | solute carrier family 25 member 30 |
| SLC25A32 | solute carrier family 25 member 32 |
| SLC25A4  | solute carrier family 25 member 4  |
| SLC25A40 | solute carrier family 25 member 40 |
| SLC25A45 | solute carrier family 25 member 45 |
| SLC26A2  | solute carrier family 26 member 2  |
| SLC26A4  | solute carrier family 26 member 4  |
| SLC28A1  | solute carrier family 28 member 1  |
| SLC28A3  | solute carrier family 28 member 3  |
| SLC29A3  | solute carrier family 29 member 3  |
| SLC2A12  | solute carrier family 2 member 12  |
| SLC30A1  | solute carrier family 30 member 1  |
| SLC30A4  | solute carrier family 30 member 4  |
| SLC30A5  | solute carrier family 30 member 5  |
| SLC30A6  | solute carrier family 30 member 6  |
| SLC30A7  | solute carrier family 30 member 7  |
| SLC31A1  | solute carrier family 31 member 1  |
| SLC31A2  | solute carrier family 31 member 2  |
| SLC35A3  | solute carrier family 35 member A3 |
| SLC35A5  | solute carrier family 35 member A5 |
| SLC35B1  | solute carrier family 35 member B1 |



|          |                                                      |
|----------|------------------------------------------------------|
| SLC35B2  | solute carrier family 35 member B2                   |
| SLC35B4  | solute carrier family 35 member B4                   |
| SLC35C1  | solute carrier family 35 member C1                   |
| SLC35D2  | solute carrier family 35 member D2                   |
| SLC35D3  | solute carrier family 35 member D3                   |
| SLC35E1  | solute carrier family 35 member E1                   |
| SLC35F1  | solute carrier family 35 member F1                   |
| SLC35F3  | solute carrier family 35 member F3                   |
| SLC35F5  | solute carrier family 35 member F5                   |
| SLC35F6  | solute carrier family 35 member F6                   |
| SLC35G2  | solute carrier family 35 member G2                   |
| SLC36A1  | solute carrier family 36 member 1                    |
| SLC36A4  | solute carrier family 36 member 4                    |
| SLC38A1  | solute carrier family 38 member 1                    |
| SLC38A2  | solute carrier family 38 member 2                    |
| SLC38A7  | solute carrier family 38 member 7                    |
| SLC39A10 | solute carrier family 39 member 10                   |
| SLC39A14 | solute carrier family 39 member 14                   |
| SLC39A6  | solute carrier family 39 member 6                    |
| SLC39A9  | solute carrier family 39 member 9                    |
| SLC41A1  | solute carrier family 41 member 1                    |
| SLC41A2  | solute carrier family 41 member 2                    |
| SLC44A1  | solute carrier family 44 member 1                    |
| SLC45A4  | solute carrier family 45 member 4                    |
| SLC46A3  | solute carrier family 46 member 3                    |
| SLC4A1   | solute carrier family 4 member 1 (Diego blood group) |
| SLC4A3   | solute carrier family 4 member 3                     |
| SLC4A4   | solute carrier family 4 member 4                     |
| SLC4A7   | solute carrier family 4 member 7                     |
| SLC52A3  | solute carrier family 52 member 3                    |
| SLC5A11  | solute carrier family 5 member 11                    |
| SLC5A6   | solute carrier family 5 member 6                     |

|          |                                                                                                                 |
|----------|-----------------------------------------------------------------------------------------------------------------|
| SLC5A9   | solute carrier family 5 member 9                                                                                |
| SLC6A1   | solute carrier family 6 member 1                                                                                |
| SLC6A11  | solute carrier family 6 member 11                                                                               |
| SLC6A17  | solute carrier family 6 member 17                                                                               |
| SLC6A5   | solute carrier family 6 member 5                                                                                |
| SLC6A9   | solute carrier family 6 member 9                                                                                |
| SLC7A11  | solute carrier family 7 member 11                                                                               |
| SLC7A2   | solute carrier family 7 member 2                                                                                |
| SLC7A6   | solute carrier family 7 member 6                                                                                |
| SLC8A1   | solute carrier family 8 member A1                                                                               |
| SLC8A2   | solute carrier family 8 member A2                                                                               |
| SLC9A1   | solute carrier family 9 member A1                                                                               |
| SLC9A2   | solute carrier family 9 member A2                                                                               |
| SLCO5A1  | solute carrier organic anion transporter family member 5A1                                                      |
| SLCO6A1  | solute carrier organic anion transporter family member 6A1                                                      |
| SLFN12   | schlafen family member 12                                                                                       |
| SLIT2    | slit guidance ligand 2                                                                                          |
| SLITRK1  | SLIT and NTRK like family member 1                                                                              |
| SLITRK2  | SLIT and NTRK like family member 2                                                                              |
| SLK      | STE20 like kinase                                                                                               |
| SLMAP    | sarcolemma associated protein                                                                                   |
| SLTM     | SAFB like transcription modulator                                                                               |
| SLX1A    | SLX1 homolog A, structure-specific endonuclease subunit                                                         |
| SLX1B    | SLX1 homolog B, structure-specific endonuclease subunit                                                         |
| SMAD1    | SMAD family member 1                                                                                            |
| SMAD2    | SMAD family member 2                                                                                            |
| SMAD5    | SMAD family member 5                                                                                            |
| SMAP1    | small ArfGAP 1                                                                                                  |
| SMAP2    | small ArfGAP2                                                                                                   |
| SMARCAD1 | SWI/SNF-related, matrix-associated actin-dependent regulator of chromatin, subfamily a, containing DEAD/H box 1 |
| SMARCB1  | SWI/SNF related, matrix associated, actin dependent regulator of chromatin, subfamily b, member 1               |
| SMARCC1  | SWI/SNF related, matrix associated, actin dependent regulator of chromatin subfamily c member 1                 |

|         |                                                                                                 |
|---------|-------------------------------------------------------------------------------------------------|
| SMARCC2 | SWI/SNF related, matrix associated, actin dependent regulator of chromatin subfamily c member 2 |
| SMC1A   | structural maintenance of chromosomes 1A                                                        |
| SMCHD1  | structural maintenance of chromosomes flexible hinge domain containing 1                        |
| SMDT1   | single-pass membrane protein with aspartate rich tail 1                                         |
| SMG1    | SMG1, nonsense mediated mRNA decay associated PI3K related kinase                               |
| SMG7    | SMG7, nonsense mediated mRNA decay factor                                                       |
| SMIM13  | small integral membrane protein 13                                                              |
| SMIM14  | small integral membrane protein 14                                                              |
| SMIM3   | small integral membrane protein 3                                                               |
| SMIM5   | small integral membrane protein 5                                                               |
| SMUG1   | single-strand-selective monofunctional uracil-DNA glycosylase 1                                 |
| SMURF1  | SMAD specific E3 ubiquitin protein ligase 1                                                     |
| SNAIL   | snail family transcriptional repressor 1                                                        |
| SNAIL2  | snail family transcriptional repressor 2                                                        |
| SNAP23  | synaptosome associated protein 23                                                               |
| SNAP25  | synaptosome associated protein 25                                                               |
| SNAP91  | synaptosome associated protein 91                                                               |
| SNAPC1  | small nuclear RNA activating complex polypeptide 1                                              |
| SNAPIN  | SNAP associated protein                                                                         |
| SNN     | stannin                                                                                         |
| SNTB2   | syntrophin beta 2                                                                               |
| SNTG1   | syntrophin gamma 1                                                                              |
| SNX1    | sorting nexin 1                                                                                 |
| SNX10   | sorting nexin 10                                                                                |
| SNX12   | sorting nexin 12                                                                                |
| SNX16   | sorting nexin 16                                                                                |
| SNX18   | sorting nexin 18                                                                                |
| SNX19   | sorting nexin 19                                                                                |
| SNX20   | sorting nexin 20                                                                                |
| SNX25   | sorting nexin 25                                                                                |
| SNX27   | sorting nexin family member 27                                                                  |
| SNX29   | sorting nexin 29                                                                                |

|         |                                                  |
|---------|--------------------------------------------------|
| SNX3    | sorting nexin 3                                  |
| SNX30   | sorting nexin family member 30                   |
| SNX33   | sorting nexin 33                                 |
| SNX6    | sorting nexin 6                                  |
| SOCS1   | suppressor of cytokine signaling 1               |
| SOCS3   | suppressor of cytokine signaling 3               |
| SOCS4   | suppressor of cytokine signaling 4               |
| SOCS6   | suppressor of cytokine signaling 6               |
| SON     | SON DNA binding protein                          |
| SORBS2  | sorbin and SH3 domain containing 2               |
| SOS1    | SOS Ras/Rac guanine nucleotide exchange factor 1 |
| SOWAHC  | sosondowah ankyrin repeat domain family member C |
| SOX1    | SRY-box 1                                        |
| SOX11   | SRY-box 11                                       |
| SOX12   | SRY-box 12                                       |
| SOX13   | SRY-box 13                                       |
| SOX2    | SRY-box 2                                        |
| SOX4    | SRY-box 4                                        |
| SOX9    | SRY-box 9                                        |
| SP2     | Sp2 transcription factor                         |
| SP4     | Sp4 transcription factor                         |
| SPAST   | spastin                                          |
| SPATA2L | spermatogenesis associated 2 like                |
| SPATA5  | spermatogenesis associated 5                     |
| SPATA7  | spermatogenesis associated 7                     |
| SPATA8  | spermatogenesis associated 8                     |
| SPATC1  | spermatogenesis and centriole associated 1       |
| SPATS2L | spermatogenesis associated serine rich 2 like    |
| SPCS3   | signal peptidase complex subunit 3               |
| SPEF2   | sperm flagellar 2                                |
| SPEG    | SPEG complex locus                               |
| SPEN    | spen family transcriptional repressor            |

|          |                                                                 |
|----------|-----------------------------------------------------------------|
| SPESP1   | sperm equatorial segment protein 1                              |
| SPHKAP   | SPHK1 interactor, AKAP domain containing                        |
| SPIN1    | spindlin 1                                                      |
| SPOCK3   | SPARC (osteonectin), cwcw and kazal like domains proteoglycan 3 |
| SPRED1   | sprouty related EVH1 domain containing 1                        |
| SPRED2   | sprouty related EVH1 domain containing 2                        |
| SPRYD4   | SPRY domain containing 4                                        |
| SPRYD7   | SPRY domain containing 7                                        |
| SPTBN1   | spectrin beta, non-erythrocytic 1                               |
| SPTBN4   | spectrin beta, non-erythrocytic 4                               |
| SPTLC3   | serine palmitoyltransferase long chain base subunit 3           |
| SPTSSA   | serine palmitoyltransferase small subunit A                     |
| SPTY2D1  | SPT2 chromatin protein domain containing 1                      |
| SQSTM1   | sequestosome 1                                                  |
| SRD5A3   | steroid 5 alpha-reductase 3                                     |
| SREK1    | splicing regulatory glutamic acid and lysine rich protein 1     |
| SREK1IP1 | SREK1 interacting protein 1                                     |
| SRGAP3   | SLIT-ROBO Rho GTPase activating protein 3                       |
| SRI      | sorcin                                                          |
| SRL      | sarcalumenin                                                    |
| SRP19    | signal recognition particle 19                                  |
| SRPK2    | SRSF protein kinase 2                                           |
| SRSF1    | serine and arginine rich splicing factor 1                      |
| SRSF10   | serine and arginine rich splicing factor 10                     |
| SRSF3    | serine and arginine rich splicing factor 3                      |
| SRSF7    | serine and arginine rich splicing factor 7                      |
| SRSF9    | serine and arginine rich splicing factor 9                      |
| SRXN1    | sulfiredoxin 1                                                  |
| SS18L1   | SS18L1, nBAF chromatin remodeling complex subunit               |
| SSBP2    | single stranded DNA binding protein 2                           |
| SSFA2    |                                                                 |
| SSH1     | slingshot protein phosphatase 1                                 |

|            |                                                              |
|------------|--------------------------------------------------------------|
| SSH2       | slingshot protein phosphatase 2                              |
| SSR3       | signal sequence receptor subunit 3                           |
| SSX2IP     | SSX family member 2 interacting protein                      |
| ST3GAL6    | ST3 beta-galactoside alpha-2,3-sialyltransferase 6           |
| ST6GALNAC3 | ST6 N-acetylgalactosaminide alpha-2,6-sialyltransferase 3    |
| ST8SIA1    | ST8 alpha-N-acetyl-neuraminide alpha-2,8-sialyltransferase 1 |
| ST8SIA2    | ST8 alpha-N-acetyl-neuraminide alpha-2,8-sialyltransferase 2 |
| ST8SIA4    | ST8 alpha-N-acetyl-neuraminide alpha-2,8-sialyltransferase 4 |
| STAC       | SH3 and cysteine rich domain                                 |
| STAM2      | signal transducing adaptor molecule 2                        |
| STAP1      | signal transducing adaptor family member 1                   |
| STARD13    | StAR related lipid transfer domain containing 13             |
| STARD3     | StAR related lipid transfer domain containing 3              |
| STARD3NL   | STARD3 N-terminal like                                       |
| STARD7     | StAR related lipid transfer domain containing 7              |
| STARD9     | StAR related lipid transfer domain containing 9              |
| STAT3      | signal transducer and activator of transcription 3           |
| STC1       | stanniocalcin 1                                              |
| STC2       | stanniocalcin 2                                              |
| STEAP3     | STEAP3 metalloredutase                                       |
| STIM2      | stromal interaction molecule 2                               |
| STK11      | serine/threonine kinase 11                                   |
| STK17B     | serine/threonine kinase 17b                                  |
| STK19      | serine/threonine kinase 19                                   |
| STK24      | serine/threonine kinase 24                                   |
| STK32A     | serine/threonine kinase 32A                                  |
| STK35      | serine/threonine kinase 35                                   |
| STK39      | serine/threonine kinase 39                                   |
| STK4       | serine/threonine kinase 4                                    |
| STK40      | serine/threonine kinase 40                                   |
| STOX2      | storkhead box 2                                              |
| STRADB     | STE20-related kinase adaptor beta                            |

|         |                                                                   |
|---------|-------------------------------------------------------------------|
| STRBP   | spermatid perinuclear RNA binding protein                         |
| STRIP1  | striatin interacting protein 1                                    |
| STRN    | striatin                                                          |
| STS     | steroid sulfatase                                                 |
| STT3B   | STT3B, catalytic subunit of the oligosaccharyltransferase complex |
| STX12   | syntaxin 12                                                       |
| STX16   | syntaxin 16                                                       |
| STX2    | syntaxin 2                                                        |
| STX5    | syntaxin 5                                                        |
| STX6    | syntaxin 6                                                        |
| STYX    | serine/threonine/tyrosine interacting protein                     |
| SUB1    | SUB1 homolog, transcriptional regulator                           |
| SUGT1   | SGT1 homolog, MIS12 kinetochore complex assembly cochaperone      |
| SULF1   | sulfatase 1                                                       |
| SULF2   | sulfatase 2                                                       |
| SULT1A3 | sulfotransferase family 1A member 3                               |
| SUPT20H | SPT20 homolog, SAGA complex component                             |
| SURF4   | surfeit 4                                                         |
| SUSD3   | sushi domain containing 3                                         |
| SUSD5   | sushi domain containing 5                                         |
| SVIL    | supervillin                                                       |
| SWT1    | SWT1, RNA endoribonuclease homolog                                |
| SYBU    | syntabulin                                                        |
| SYDE1   | synapse defective Rho GTPase homolog 1                            |
| SYNC    | syncoilin, intermediate filament protein                          |
| SYNCRIP | synaptotagmin binding cytoplasmic RNA interacting protein         |
| SYNE1   | spectrin repeat containing nuclear envelope protein 1             |
| SYNGR3  | synaptogyrin 3                                                    |
| SYNJ1   | synaptojanin 1                                                    |
| SYPL1   | synaptophysin like 1                                              |
| SYT1    | synaptotagmin 1                                                   |
| SYT10   | synaptotagmin 10                                                  |

|          |                                                                       |
|----------|-----------------------------------------------------------------------|
| SYT11    | synaptotagmin 11                                                      |
| SYT2     | synaptotagmin 2                                                       |
| SYT7     | synaptotagmin 7                                                       |
| SYT9     | synaptotagmin 9                                                       |
| SYTL4    | synaptotagmin like 4                                                  |
| TAB2     | TGF-beta activated kinase 1 (MAP3K7) binding protein 2                |
| TAB3     | TGF-beta activated kinase 1 (MAP3K7) binding protein 3                |
| TACR1    | tachykinin receptor 1                                                 |
| TACR3    | tachykinin receptor 3                                                 |
| TAF12    | TATA-box binding protein associated factor 12                         |
| TAF2     | TATA-box binding protein associated factor 2                          |
| TAF4B    | TATA-box binding protein associated factor 4b                         |
| TAF5     | TATA-box binding protein associated factor 5                          |
| TAF5L    | TATA-box binding protein associated factor 5 like                     |
| TAF9B    | TATA-box binding protein associated factor 9b                         |
| TAGAP    | T cell activation RhoGTPase activating protein                        |
| TAGLN2   | transgelin 2                                                          |
| TANC2    | tetratricopeptide repeat, ankyrin repeat and coiled-coil containing 2 |
| TAOK1    | TAO kinase 1                                                          |
| TAOK3    | TAO kinase 3                                                          |
| TAP1     | transporter 1, ATP binding cassette subfamily B member                |
| TARBP2   | TARBP2, RISC loading complex RNA binding subunit                      |
| TASP1    | taspase 1                                                             |
| TAT      | tyrosine aminotransferase                                             |
| TBC1D10B | TBC1 domain family member 10B                                         |
| TBC1D12  | TBC1 domain family member 12                                          |
| TBC1D13  | TBC1 domain family member 13                                          |
| TBC1D15  | TBC1 domain family member 15                                          |
| TBC1D22A | TBC1 domain family member 22A                                         |
| TBC1D8B  | TBC1 domain family member 8B                                          |
| TBC1D9B  | TBC1 domain family member 9B                                          |
| TBCA     | tubulin folding cofactor A                                            |



|         |                                             |
|---------|---------------------------------------------|
| TBCC    | tubulin folding cofactor C                  |
| TBCK    | TBC1 domain containing kinase               |
| TBK1    | TANK binding kinase 1                       |
| TBKBP1  | TBK1 binding protein 1                      |
| TBL1XR1 | transducin beta like 1 X-linked receptor 1  |
| TBPL1   | TATA-box binding protein like 1             |
| TBX18   | T-box 18                                    |
| TBX5    | T-box 5                                     |
| TC2N    | tandem C2 domains, nuclear                  |
| TCAIM   | T cell activation inhibitor, mitochondrial  |
| TCF21   | transcription factor 21                     |
| TCF24   | transcription factor 24                     |
| TCF4    | transcription factor 4                      |
| TDGF1   | teratocarcinoma-derived growth factor 1     |
| TDP1    | tyrosyl-DNA phosphodiesterase 1             |
| TDRD7   | tudor domain containing 7                   |
| TDRP    | testis development related protein          |
| TEC     | tec protein tyrosine kinase                 |
| TECPR2  | tectonin beta-propeller repeat containing 2 |
| TECRL   | trans-2,3-enoyl-CoA reductase like          |
| TERF1   | telomeric repeat binding factor 1           |
| TET1    | tet methylcytosine dioxygenase 1            |
| TET3    | tet methylcytosine dioxygenase 3            |
| TEX2    | testis expressed 2                          |
| TEX22   | testis expressed 22                         |
| TFAP2A  | transcription factor AP-2 alpha             |
| TFAP2B  | transcription factor AP-2 beta              |
| TFCP2L1 | transcription factor CP2 like 1             |
| TFDP1   | transcription factor Dp-1                   |
| TFEC    | transcription factor EC                     |
| TFR2    | transferrin receptor 2                      |
| TGDS    | TDP-glucose 4,6-dehydratase                 |

|         |                                                          |
|---------|----------------------------------------------------------|
| TGFB1   | transforming growth factor beta 1                        |
| TGFBR1  | transforming growth factor beta receptor 1               |
| TGFBR3  | transforming growth factor beta receptor 3               |
| TGIF1   | TGFB induced factor homeobox 1                           |
| TGIF2   | TGFB induced factor homeobox 2                           |
| TGOLN2  | trans-golgi network protein 2                            |
| THAP1   | THAP domain containing 1                                 |
| THAP11  | THAP domain containing 11                                |
| THAP2   | THAP domain containing 2                                 |
| THAP5   | THAP domain containing 5                                 |
| THBS1   | thrombospondin 1                                         |
| THEM4   | thioesterase superfamily member 4                        |
| THOC2   | THO complex 2                                            |
| THRA    | thyroid hormone receptor alpha                           |
| THRAP3  | thyroid hormone receptor associated protein 3            |
| THRB    | thyroid hormone receptor beta                            |
| THRSP   | thyroid hormone responsive                               |
| THSD7A  | thrombospondin type 1 domain containing 7A               |
| THUMPD3 | THUMP domain containing 3                                |
| TIA1    | TIA1 cytotoxic granule associated RNA binding protein    |
| TICAM1  | toll like receptor adaptor molecule 1                    |
| TIFA    | TRAF interacting protein with forkhead associated domain |
| TIGD6   | tigger transposable element derived 6                    |
| TIMM17A | translocase of inner mitochondrial membrane 17A          |
| TIMP2   | TIMP metalloproteinase inhibitor 2                       |
| TIMP3   | TIMP metalloproteinase inhibitor 3                       |
| TJP1    | tight junction protein 1                                 |
| TK2     | thymidine kinase 2, mitochondrial                        |
| TLDC1   | TBC/LysM-Associated Domain Containing 1                  |
| TLE4    | transducin like enhancer of split 4                      |
| TLK2    | tousled like kinase 2                                    |
| TLL1    | tolloid like 1                                           |

|                |                                                                        |
|----------------|------------------------------------------------------------------------|
| TLL2           | tolloid like 2                                                         |
| TLR4           | toll like receptor 4                                                   |
| TM4SF18        | transmembrane 4 L six family member 18                                 |
| TM4SF20        | transmembrane 4 L six family member 20                                 |
| TM9SF4         | transmembrane 9 superfamily member 4                                   |
| TMA16          | translation machinery associated 16 homolog                            |
| TMC7           | transmembrane channel like 7                                           |
| TMCC1          | transmembrane and coiled-coil domain family 1                          |
| TMED10         | transmembrane p24 trafficking protein 10                               |
| TMED2          | transmembrane p24 trafficking protein 2                                |
| TMED4          | transmembrane p24 trafficking protein 4                                |
| TMED5          | transmembrane p24 trafficking protein 5                                |
| TMEFF1         | transmembrane protein with EGF like and two follistatin like domains 1 |
| TMEM106B       | transmembrane protein 106B                                             |
| TMEM123        | transmembrane protein 123                                              |
| TMEM129        | transmembrane protein 129                                              |
| TMEM135        | transmembrane protein 135                                              |
| TMEM143        | transmembrane protein 143                                              |
| TMEM144        | transmembrane protein 144                                              |
| TMEM154        | transmembrane protein 154                                              |
| TMEM167A       | transmembrane protein 167A                                             |
| TMEM169        | transmembrane protein 169                                              |
| TMEM17         | transmembrane protein 17                                               |
| TMEM170A       | transmembrane protein 170A                                             |
| TMEM170B       | transmembrane protein 170B                                             |
| TMEM178A       | transmembrane protein 178A                                             |
| TMEM178B       | transmembrane protein 178B                                             |
| TMEM181        | transmembrane protein 181                                              |
| TMEM184B       | transmembrane protein 184B                                             |
| TMEM189-UBE2V1 | TMEM189-UBE2V1 readthrough                                             |
| TMEM192        | transmembrane protein 192                                              |
| TMEM196        | transmembrane protein 196                                              |

|           |                                                          |
|-----------|----------------------------------------------------------|
| TMEM2     |                                                          |
| TMEM211   | transmembrane protein 211                                |
| TMEM222   | transmembrane protein 222                                |
| TMEM229A  | transmembrane protein 229A                               |
| TMEM229B  | transmembrane protein 229B                               |
| TMEM232   | transmembrane protein 232                                |
| TMEM243   | transmembrane protein 243                                |
| TMEM246   | transmembrane protein 246                                |
| TMEM254   | transmembrane protein 254                                |
| TMEM255A  | transmembrane protein 255A                               |
| TMEM26    | transmembrane protein 26                                 |
| TMEM260   | transmembrane protein 260                                |
| TMEM33    | transmembrane protein 33                                 |
| TMEM41A   | transmembrane protein 41A                                |
| TMEM47    | transmembrane protein 47                                 |
| TMEM51    | transmembrane protein 51                                 |
| TMEM56    | transmembrane protein 56                                 |
| TMEM64    | transmembrane protein 64                                 |
| TMEM65    | transmembrane protein 65                                 |
| TMEM68    | transmembrane protein 68                                 |
| TMEM69    | transmembrane protein 69                                 |
| TMEM87A   | transmembrane protein 87A                                |
| TMEM98    | transmembrane protein 98                                 |
| TMOD2     | tropomodulin 2                                           |
| TMOD3     | tropomodulin 3                                           |
| TMPPE     | transmembrane protein with metallophosphoesterase domain |
| TMPRSS11F | transmembrane serine protease 11F                        |
| TMTC1     | transmembrane and tetratricopeptide repeat containing 1  |
| TMTC2     | transmembrane and tetratricopeptide repeat containing 2  |
| TMTC3     | transmembrane and tetratricopeptide repeat containing 3  |
| TNFAIP8   | TNF alpha induced protein 8                              |
| TNFAIP8L1 | TNF alpha induced protein 8 like 1                       |

|           |                                                |
|-----------|------------------------------------------------|
| TNFRSF10B | TNF receptor superfamily member 10b            |
| TNFRSF10D | TNF receptor superfamily member 10d            |
| TNFRSF11B | TNF receptor superfamily member 11b            |
| TNFRSF1B  | TNF receptor superfamily member 1B             |
| TNFRSF9   | TNF receptor superfamily member 9              |
| TNFSF10   | TNF superfamily member 10                      |
| TNFSF9    | TNF superfamily member 9                       |
| TNIK      | TRAF2 and NCK interacting kinase               |
| TNKS      | tankyrase                                      |
| TNKS1BP1  | tankyrase 1 binding protein 1                  |
| TNKS2     | tankyrase 2                                    |
| TNPO1     | transportin 1                                  |
| TNRC6A    | trinucleotide repeat containing 6A             |
| TNRC6B    | trinucleotide repeat containing 6B             |
| TNRC6C    | trinucleotide repeat containing 6C             |
| TNS4      | tensin 4                                       |
| TOB1      | transducer of ERBB2, 1                         |
| TOMM20    | translocase of outer mitochondrial membrane 20 |
| TOPORS    | TOP1 binding arginine/serine rich protein      |
| TOR1AIP2  | torsin 1A interacting protein 2                |
| TOX3      | TOX high mobility group box family member 3    |
| TP53      | tumor protein p53                              |
| TP53INP1  | tumor protein p53 inducible nuclear protein 1  |
| TP53TG3D  | TP53 target 3D                                 |
| TP73      | tumor protein p73                              |
| TPBG      | trophoblast glycoprotein                       |
| TPCN2     | two pore segment channel 2                     |
| TPM2      | tropomyosin 2                                  |
| TPM3      | tropomyosin 3                                  |
| TPM4      | tropomyosin 4                                  |
| TPP1      | tripeptidyl peptidase 1                        |
| TPPP      | tubulin polymerization promoting protein       |

|          |                                                |
|----------|------------------------------------------------|
| TPRX1    | tetrapeptide repeat homeobox 1                 |
| TRABD    | TraB domain containing                         |
| TRAF5    | TNF receptor associated factor 5               |
| TRAM2    | translocation associated membrane protein 2    |
| TRAPPC1  | trafficking protein particle complex 1         |
| TRAPPC2  | trafficking protein particle complex 2         |
| TRAPPC3  | trafficking protein particle complex 3         |
| TRAPPC6B | trafficking protein particle complex 6B        |
| TRAPPC8  | trafficking protein particle complex 8         |
| TRDMT1   | tRNA aspartic acid methyltransferase 1         |
| TRHDE    | thyrotropin releasing hormone degrading enzyme |
| TRIB1    | tribbles pseudokinase 1                        |
| TRIB2    | tribbles pseudokinase 2                        |
| TRIM13   | tripartite motif containing 13                 |
| TRIM2    | tripartite motif containing 2                  |
| TRIM23   | tripartite motif containing 23                 |
| TRIM31   | tripartite motif containing 31                 |
| TRIM33   | tripartite motif containing 33                 |
| TRIM35   | tripartite motif containing 35                 |
| TRIM37   | tripartite motif containing 37                 |
| TRIM41   | tripartite motif containing 41                 |
| TRIM59   | tripartite motif containing 59                 |
| TRIM67   | tripartite motif containing 67                 |
| TRIM71   | tripartite motif containing 71                 |
| TRIML1   | tripartite motif family like 1                 |
| TRIML2   | tripartite motif family like 2                 |
| TRIQK    | triple QxxK/R motif containing                 |
| TRMT10A  | tRNA methyltransferase 10A                     |
| TRMT13   | tRNA methyltransferase 13 homolog              |
| TRMT5    | tRNA methyltransferase 5                       |
| TRO      | trophinin                                      |
| TROVE2   | TROVE domain family member 2                   |

|         |                                                                  |
|---------|------------------------------------------------------------------|
| TRPA1   | transient receptor potential cation channel subfamily A member 1 |
| TRPC5   | transient receptor potential cation channel subfamily C member 5 |
| TRPC6   | transient receptor potential cation channel subfamily C member 6 |
| TRPM7   | transient receptor potential cation channel subfamily M member 7 |
| TRPS1   | transcriptional repressor GATA binding 1                         |
| TRPV3   | transient receptor potential cation channel subfamily V member 3 |
| TSC1    | TSC complex subunit 1                                            |
| TSC22D1 | TSC22 domain family member 1                                     |
| TSC22D2 | TSC22 domain family member 2                                     |
| TSC22D3 | TSC22 domain family member 3                                     |
| TSEN15  | tRNA splicing endonuclease subunit 15                            |
| TSG101  | tumor susceptibility 101                                         |
| TSHZ3   | teashirt zinc finger homeobox 3                                  |
| TSPAN13 | tetraspanin 13                                                   |
| TSPAN18 | tetraspanin 18                                                   |
| TSPAN2  | tetraspanin 2                                                    |
| TSPAN4  | tetraspanin 4                                                    |
| TSPAN9  | tetraspanin 9                                                    |
| TSPEAR  | thrombospondin type laminin G domain and EAR repeats             |
| TSPYL4  | TSPY like 4                                                      |
| TSTD2   | thiosulfate sulfurtransferase like domain containing 2           |
| TTC13   | tetratricopeptide repeat domain 13                               |
| TTC14   | tetratricopeptide repeat domain 14                               |
| TTC17   | tetratricopeptide repeat domain 17                               |
| TTC21B  | tetratricopeptide repeat domain 21B                              |
| TTC26   | tetratricopeptide repeat domain 26                               |
| TTC31   | tetratricopeptide repeat domain 31                               |
| TTC39C  | tetratricopeptide repeat domain 39C                              |
| TTC8    | tetratricopeptide repeat domain 8                                |
| TTC9    | tetratricopeptide repeat domain 9                                |
| TTC9C   | tetratricopeptide repeat domain 9C                               |
| TTL     | tubulin tyrosine ligase                                          |

|         |                                                                |
|---------|----------------------------------------------------------------|
| TLL4    | tubulin tyrosine ligase like 4                                 |
| TLL5    | tubulin tyrosine ligase like 5                                 |
| TLL6    | tubulin tyrosine ligase like 6                                 |
| TLL7    | tubulin tyrosine ligase like 7                                 |
| TTPA    | alpha tocopherol transfer protein                              |
| TTPAL   | alpha tocopherol transfer protein like                         |
| TTR     | transthyretin                                                  |
| TUBB6   | tubulin beta 6 class V                                         |
| TUBGCP3 | tubulin gamma complex associated protein 3                     |
| TUBGCP6 | tubulin gamma complex associated protein 6                     |
| TUSC2   | tumor suppressor 2, mitochondrial calcium regulator            |
| TUSC3   | tumor suppressor candidate 3                                   |
| TVP23B  | trans-golgi network vesicle protein 23 homolog B               |
| TWF1    | twinfilin actin binding protein 1                              |
| TWISTNB | TWIST neighbor                                                 |
| TWSG1   | twisted gastrulation BMP signaling modulator 1                 |
| TXLNG   | taxilin gamma                                                  |
| TYW5    | tRNA-yW synthesizing protein 5                                 |
| UACA    | uveal autoantigen with coiled-coil domains and ankyrin repeats |
| UAP1    | UDP-N-acetylglucosamine pyrophosphorylase 1                    |
| UBA5    | ubiquitin like modifier activating enzyme 5                    |
| UBA6    | ubiquitin like modifier activating enzyme 6                    |
| UBAC1   | UBA domain containing 1                                        |
| UBE2B   | ubiquitin conjugating enzyme E2 B                              |
| UBE2D1  | ubiquitin conjugating enzyme E2 D1                             |
| UBE2D2  | ubiquitin conjugating enzyme E2 D2                             |
| UBE2D3  | ubiquitin conjugating enzyme E2 D3                             |
| UBE2F   | ubiquitin conjugating enzyme E2 F (putative)                   |
| UBE2G1  | ubiquitin conjugating enzyme E2 G1                             |
| UBE2H   | ubiquitin conjugating enzyme E2 H                              |
| UBE2I   | ubiquitin conjugating enzyme E2 I                              |
| UBE2J1  | ubiquitin conjugating enzyme E2 J1                             |



|          |                                                    |
|----------|----------------------------------------------------|
| UBE2K    | ubiquitin conjugating enzyme E2 K                  |
| UBE2R2   | ubiquitin conjugating enzyme E2 R2                 |
| UBE2V1   | ubiquitin conjugating enzyme E2 V1                 |
| UBE2V2   | ubiquitin conjugating enzyme E2 V2                 |
| UBE2W    | ubiquitin conjugating enzyme E2 W                  |
| UBE3A    | ubiquitin protein ligase E3A                       |
| UBE3C    | ubiquitin protein ligase E3C                       |
| UBE4A    | ubiquitination factor E4A                          |
| UBN1     | ubinuclein 1                                       |
| UBN2     | ubinuclein 2                                       |
| UBP1     | upstream binding protein 1                         |
| UBR5     | ubiquitin protein ligase E3 component n-recognin 5 |
| UBTD2    | ubiquitin domain containing 2                      |
| UBXN10   | UBX domain protein 10                              |
| UBXN2A   | UBX domain protein 2A                              |
| UBXN2B   | UBX domain protein 2B                              |
| UBXN7    | UBX domain protein 7                               |
| UCHL5    | ubiquitin C-terminal hydrolase L5                  |
| UCP3     | uncoupling protein 3                               |
| UFL1     | UFM1 specific ligase 1                             |
| UFM1     | ubiquitin fold modifier 1                          |
| UGCG     | UDP-glucose ceramide glucosyltransferase           |
| UGGT1    | UDP-glucose glycoprotein glucosyltransferase 1     |
| UGT2A3   | UDP glucuronosyltransferase family 2 member A3     |
| UGT3A1   | UDP glycosyltransferase family 3 member A1         |
| UGT8     | UDP glycosyltransferase 8                          |
| UHMK1    | U2AF homology motif kinase 1                       |
| UHRF1BP1 | UHRF1 binding protein 1                            |
| UHRF2    | ubiquitin like with PHD and ring finger domains 2  |
| ULK1     | unc-51 like autophagy activating kinase 1          |
| ULK2     | unc-51 like autophagy activating kinase 2          |
| ULK3     | unc-51 like kinase 3                               |

|         |                                                   |
|---------|---------------------------------------------------|
| UNC119  | unc-119 lipid binding chaperone                   |
| UNC119B | unc-119 lipid binding chaperone B                 |
| UNC50   | unc-50 inner nuclear membrane RNA binding protein |
| UNKL    | unkempt family like zinc finger                   |
| UPRT    | uracil phosphoribosyltransferase homolog          |
| USP12   | ubiquitin specific peptidase 12                   |
| USP13   | ubiquitin specific peptidase 13                   |
| USP15   | ubiquitin specific peptidase 15                   |
| USP18   | ubiquitin specific peptidase 18                   |
| USP2    | ubiquitin specific peptidase 2                    |
| USP21   | ubiquitin specific peptidase 21                   |
| USP22   | ubiquitin specific peptidase 22                   |
| USP24   | ubiquitin specific peptidase 24                   |
| USP25   | ubiquitin specific peptidase 25                   |
| USP28   | ubiquitin specific peptidase 28                   |
| USP3    | ubiquitin specific peptidase 3                    |
| USP33   | ubiquitin specific peptidase 33                   |
| USP37   | ubiquitin specific peptidase 37                   |
| USP38   | ubiquitin specific peptidase 38                   |
| USP44   | ubiquitin specific peptidase 44                   |
| USP45   | ubiquitin specific peptidase 45                   |
| USP46   | ubiquitin specific peptidase 46                   |
| USP47   | ubiquitin specific peptidase 47                   |
| USP48   | ubiquitin specific peptidase 48                   |
| USP49   | ubiquitin specific peptidase 49                   |
| USP6    | ubiquitin specific peptidase 6                    |
| USP6NL  | USP6 N-terminal like                              |
| USP9X   | ubiquitin specific peptidase 9 X-linked           |
| UST     | uronyl 2-sulfotransferase                         |
| UTRN    | utrophin                                          |
| VAMP1   | vesicle associated membrane protein 1             |
| VAMP3   | vesicle associated membrane protein 3             |

|          |                                                        |
|----------|--------------------------------------------------------|
| VAMP4    | vesicle associated membrane protein 4                  |
| VANGL2   | VANGL planar cell polarity protein 2                   |
| VAPA     | VAMP associated protein A                              |
| VASH1    | vasohibin 1                                            |
| VASH2    | vasohibin 2                                            |
| VAT1     | vesicle amine transport 1                              |
| VAT1L    | vesicle amine transport 1 like                         |
| VAV3     | vav guanine nucleotide exchange factor 3               |
| VCPIP1   | valosin containing protein interacting protein 1       |
| VDAC1    | voltage dependent anion channel 1                      |
| VEGFA    | vascular endothelial growth factor A                   |
| VENTX    | VENT homeobox                                          |
| VEZT     | vezatin, adherens junctions transmembrane protein      |
| VGLL3    | vestigial like family member 3                         |
| VGLL4    | vestigial like family member 4                         |
| VIM      | vimentin                                               |
| VKORC1L1 | vitamin K epoxide reductase complex subunit 1 like 1   |
| VLDLR    | very low density lipoprotein receptor                  |
| VOPP1    | VOPP1, WBP1/VOPP1 family member                        |
| VPS13A   | vacuolar protein sorting 13 homolog A                  |
| VPS13C   | vacuolar protein sorting 13 homolog C                  |
| VPS25    | vacuolar protein sorting 25 homolog                    |
| VPS26A   | VPS26, retromer complex component A                    |
| VPS26B   | VPS26, retromer complex component B                    |
| VPS33A   | VPS33A, CORVET/HOPS core subunit                       |
| VSIG1    | V-set and immunoglobulin domain containing 1           |
| VSTM5    | V-set and transmembrane domain containing 5            |
| VTI1B    | vesicle transport through interaction with t-SNAREs 1B |
| VWA3B    | von Willebrand factor A domain containing 3B           |
| WARS2    | tryptophanyl tRNA synthetase 2, mitochondrial          |
| WASF3    | WAS protein family member 3                            |
| WASL     | Wiskott-Aldrich syndrome like                          |

|       |                                                    |
|-------|----------------------------------------------------|
| WBP1L | WW domain binding protein 1 like                   |
| WDR1  | WD repeat domain 1                                 |
| WDR20 | WD repeat domain 20                                |
| WDR26 | WD repeat domain 26                                |
| WDR33 | WD repeat domain 33                                |
| WDR35 | WD repeat domain 35                                |
| WDR37 | WD repeat domain 37                                |
| WDR44 | WD repeat domain 44                                |
| WDR48 | WD repeat domain 48                                |
| WDR7  | WD repeat domain 7                                 |
| WDR73 | WD repeat domain 73                                |
| WDR82 | WD repeat domain 82                                |
| WFDC3 | WAP four-disulfide core domain 3                   |
| WIF1  | WNT inhibitory factor 1                            |
| WIPF2 | WAS/WASL interacting protein family member 2       |
| WIPF3 | WAS/WASL interacting protein family member 3       |
| WIPI2 | WD repeat domain, phosphoinositide interacting 2   |
| WNK3  | WNK lysine deficient protein kinase 3              |
| WNT16 | Wnt family member 16                               |
| WNT2B | Wnt family member 2B                               |
| WNT5A | Wnt family member 5A                               |
| WNT8B | Wnt family member 8B                               |
| WNT9A | Wnt family member 9A                               |
| WT1   | Wilms tumor 1                                      |
| WWC2  | WW and C2 domain containing 2                      |
| WWC3  | WWC family member 3                                |
| WWP1  | WW domain containing E3 ubiquitin protein ligase 1 |
| XAF1  | XIAP associated factor 1                           |
| XIAP  | X-linked inhibitor of apoptosis                    |
| XK    | X-linked Kx blood group                            |
| XKR4  | XK related 4                                       |
| XKR6  | XK related 6                                       |

|         |                                                                                |
|---------|--------------------------------------------------------------------------------|
| XKR8    | XK related 8                                                                   |
| XPNPEP3 | X-prolyl aminopeptidase 3                                                      |
| XPO1    | exportin 1                                                                     |
| XPO4    | exportin 4                                                                     |
| XPO6    | exportin 6                                                                     |
| XPOT    | exportin for tRNA                                                              |
| XPR1    | xenotropic and polytropic retrovirus receptor 1                                |
| XRN1    | 5'-3' exoribonuclease 1                                                        |
| XYLT1   | xylosyltransferase 1                                                           |
| XYLT2   | xylosyltransferase 2                                                           |
| YAF2    | YY1 associated factor 2                                                        |
| YAP1    | Yes associated protein 1                                                       |
| YBX1    | Y-box binding protein 1                                                        |
| YBX3    | Y-box binding protein 3                                                        |
| YES1    | YES proto-oncogene 1, Src family tyrosine kinase                               |
| YIPF1   | Yip1 domain family member 1                                                    |
| YIPF3   | Yip1 domain family member 3                                                    |
| YLPM1   | YLP motif containing 1                                                         |
| YOD1    | YOD1 deubiquitinase                                                            |
| YPEL2   | yippee like 2                                                                  |
| YPEL5   | yippee like 5                                                                  |
| YTHDC1  | YTH domain containing 1                                                        |
| YWHAE   | tyrosine 3-monooxygenase/tryptophan 5-monooxygenase activation protein epsilon |
| YWHAG   | tyrosine 3-monooxygenase/tryptophan 5-monooxygenase activation protein gamma   |
| YWHAQ   | tyrosine 3-monooxygenase/tryptophan 5-monooxygenase activation protein theta   |
| YWHAZ   | tyrosine 3-monooxygenase/tryptophan 5-monooxygenase activation protein zeta    |
| YY1     | YY1 transcription factor                                                       |
| YY2     | YY2 transcription factor                                                       |
| ZBTB10  | zinc finger and BTB domain containing 10                                       |
| ZBTB11  | zinc finger and BTB domain containing 11                                       |
| ZBTB18  | zinc finger and BTB domain containing 18                                       |
| ZBTB21  | zinc finger and BTB domain containing 21                                       |

|         |                                                          |
|---------|----------------------------------------------------------|
| ZBTB24  | zinc finger and BTB domain containing 24                 |
| ZBTB26  | zinc finger and BTB domain containing 26                 |
| ZBTB33  | zinc finger and BTB domain containing 33                 |
| ZBTB37  | zinc finger and BTB domain containing 37                 |
| ZBTB39  | zinc finger and BTB domain containing 39                 |
| ZBTB4   | zinc finger and BTB domain containing 4                  |
| ZBTB40  | zinc finger and BTB domain containing 40                 |
| ZBTB41  | zinc finger and BTB domain containing 41                 |
| ZBTB49  | zinc finger and BTB domain containing 49                 |
| ZBTB5   | zinc finger and BTB domain containing 5                  |
| ZBTB7A  | zinc finger and BTB domain containing 7A                 |
| ZBTB7C  | zinc finger and BTB domain containing 7C                 |
| ZBTB8A  | zinc finger and BTB domain containing 8A                 |
| ZBTB8B  | zinc finger and BTB domain containing 8B                 |
| ZC2HC1C | zinc finger C2HC-type containing 1C                      |
| ZC3H11A | zinc finger CCCH-type containing 11A                     |
| ZC3H3   | zinc finger CCCH-type containing 3                       |
| ZC3H6   | zinc finger CCCH-type containing 6                       |
| ZC3H7B  | zinc finger CCCH-type containing 7B                      |
| ZC3H8   | zinc finger CCCH-type containing 8                       |
| ZCCHC11 |                                                          |
| ZCCHC14 | zinc finger CCHC-type containing 14                      |
| ZCCHC24 | zinc finger CCHC-type containing 24                      |
| ZCCHC9  | zinc finger CCHC-type containing 9                       |
| ZCRB1   | zinc finger CCHC-type and RNA binding motif containing 1 |
| ZDHHC15 | zinc finger DHHC-type containing 15                      |
| ZDHHC17 | zinc finger DHHC-type containing 17                      |
| ZDHHC21 | zinc finger DHHC-type containing 21                      |
| ZDHHC6  | zinc finger DHHC-type containing 6                       |
| ZDHHC9  | zinc finger DHHC-type containing 9                       |
| ZEB1    | zinc finger E-box binding homeobox 1                     |
| ZEB2    | zinc finger E-box binding homeobox 2                     |

|         |                                          |
|---------|------------------------------------------|
| ZFAND5  | zinc finger AN1-type containing 5        |
| ZFAND6  | zinc finger AN1-type containing 6        |
| ZFC3H1  | zinc finger C3H1-type containing         |
| ZFHX2   | zinc finger homeobox 2                   |
| ZFHX4   | zinc finger homeobox 4                   |
| ZFP1    | ZFP1 zinc finger protein                 |
| ZFP3    | ZFP3 zinc finger protein                 |
| ZFP36L1 | ZFP36 ring finger protein like 1         |
| ZFP36L2 | ZFP36 ring finger protein like 2         |
| ZFPM2   | zinc finger protein, FOG family member 2 |
| ZFX     | zinc finger protein X-linked             |
| ZFY     | zinc finger protein Y-linked             |
| ZFYVE16 | zinc finger FYVE-type containing 16      |
| ZFYVE26 | zinc finger FYVE-type containing 26      |
| ZIC1    | Zic family member 1                      |
| ZIC5    | Zic family member 5                      |
| ZKSCAN2 | zinc finger with KRAB and SCAN domains 2 |
| ZKSCAN8 | zinc finger with KRAB and SCAN domains 8 |
| ZMAT3   | zinc finger matrin-type 3                |
| ZMYND11 | zinc finger MYND-type containing 11      |
| ZNF10   | zinc finger protein 10                   |
| ZNF100  | zinc finger protein 100                  |
| ZNF117  | zinc finger protein 117                  |
| ZNF12   | zinc finger protein 12                   |
| ZNF124  | zinc finger protein 124                  |
| ZNF141  | zinc finger protein 141                  |
| ZNF148  | zinc finger protein 148                  |
| ZNF154  | zinc finger protein 154                  |
| ZNF197  | zinc finger protein 197                  |
| ZNF200  | zinc finger protein 200                  |
| ZNF202  | zinc finger protein 202                  |
| ZNF217  | zinc finger protein 217                  |

|         |                          |
|---------|--------------------------|
| ZNF226  | zinc finger protein 226  |
| ZNF227  | zinc finger protein 227  |
| ZNF235  | zinc finger protein 235  |
| ZNF24   | zinc finger protein 24   |
| ZNF250  | zinc finger protein 250  |
| ZNF260  | zinc finger protein 260  |
| ZNF268  | zinc finger protein 268  |
| ZNF275  | zinc finger protein 275  |
| ZNF280C | zinc finger protein 280C |
| ZNF281  | zinc finger protein 281  |
| ZNF286B | zinc finger protein 286B |
| ZNF302  | zinc finger protein 302  |
| ZNF318  | zinc finger protein 318  |
| ZNF326  | zinc finger protein 326  |
| ZNF329  | zinc finger protein 329  |
| ZNF331  | zinc finger protein 331  |
| ZNF341  | zinc finger protein 341  |
| ZNF343  | zinc finger protein 343  |
| ZNF345  | zinc finger protein 345  |
| ZNF347  | zinc finger protein 347  |
| ZNF354B | zinc finger protein 354B |
| ZNF365  | zinc finger protein 365  |
| ZNF367  | zinc finger protein 367  |
| ZNF382  | zinc finger protein 382  |
| ZNF385B | zinc finger protein 385B |
| ZNF394  | zinc finger protein 394  |
| ZNF395  | zinc finger protein 395  |
| ZNF410  | zinc finger protein 410  |
| ZNF423  | zinc finger protein 423  |
| ZNF429  | zinc finger protein 429  |
| ZNF430  | zinc finger protein 430  |
| ZNF431  | zinc finger protein 431  |



|         |                          |
|---------|--------------------------|
| ZNF436  | zinc finger protein 436  |
| ZNF44   | zinc finger protein 44   |
| ZNF451  | zinc finger protein 451  |
| ZNF461  | zinc finger protein 461  |
| ZNF462  | zinc finger protein 462  |
| ZNF471  | zinc finger protein 471  |
| ZNF473  | zinc finger protein 473  |
| ZNF474  | zinc finger protein 474  |
| ZNF484  | zinc finger protein 484  |
| ZNF512  | zinc finger protein 512  |
| ZNF516  | zinc finger protein 516  |
| ZNF521  | zinc finger protein 521  |
| ZNF527  | zinc finger protein 527  |
| ZNF529  | zinc finger protein 529  |
| ZNF532  | zinc finger protein 532  |
| ZNF543  | zinc finger protein 543  |
| ZNF548  | zinc finger protein 548  |
| ZNF550  | zinc finger protein 550  |
| ZNF557  | zinc finger protein 557  |
| ZNF566  | zinc finger protein 566  |
| ZNF577  | zinc finger protein 577  |
| ZNF580  | zinc finger protein 580  |
| ZNF582  | zinc finger protein 582  |
| ZNF583  | zinc finger protein 583  |
| ZNF585A | zinc finger protein 585A |
| ZNF592  | zinc finger protein 592  |
| ZNF606  | zinc finger protein 606  |
| ZNF618  | zinc finger protein 618  |
| ZNF620  | zinc finger protein 620  |
| ZNF621  | zinc finger protein 621  |
| ZNF644  | zinc finger protein 644  |
| ZNF652  | zinc finger protein 652  |

|         |                                         |
|---------|-----------------------------------------|
| ZNF655  | zinc finger protein 655                 |
| ZNF677  | zinc finger protein 677                 |
| ZNF679  | zinc finger protein 679                 |
| ZNF689  | zinc finger protein 689                 |
| ZNF692  | zinc finger protein 692                 |
| ZNF697  | zinc finger protein 697                 |
| ZNF704  | zinc finger protein 704                 |
| ZNF708  | zinc finger protein 708                 |
| ZNF710  | zinc finger protein 710                 |
| ZNF711  | zinc finger protein 711                 |
| ZNF763  | zinc finger protein 763                 |
| ZNF772  | zinc finger protein 772                 |
| ZNF773  | zinc finger protein 773                 |
| ZNF774  | zinc finger protein 774                 |
| ZNF780A | zinc finger protein 780A                |
| ZNF781  | zinc finger protein 781                 |
| ZNF784  | zinc finger protein 784                 |
| ZNF789  | zinc finger protein 789                 |
| ZNF792  | zinc finger protein 792                 |
| ZNF800  | zinc finger protein 800                 |
| ZNF827  | zinc finger protein 827                 |
| ZNF83   | zinc finger protein 83                  |
| ZNF831  | zinc finger protein 831                 |
| ZNF843  | zinc finger protein 843                 |
| ZNF850  | zinc finger protein 850                 |
| ZNF879  | zinc finger protein 879                 |
| ZNFX1   | zinc finger NFX1-type containing 1      |
| ZNRF1   | zinc and ring finger 1                  |
| ZNRF3   | zinc and ring finger 3                  |
| ZPBP2   | zona pellucida binding protein 2        |
| ZPLD1   | zona pellucida like domain containing 1 |
| ZRANB2  | zinc finger RANBP2-type containing 2    |

|         |                                           |
|---------|-------------------------------------------|
| ZSCAN29 | zinc finger and SCAN domain containing 29 |
| ZSWIM4  | zinc finger SWIM-type containing 4        |
| ZSWIM5  | zinc finger SWIM-type containing 5        |
| ZXDA    | zinc finger X-linked duplicated A         |
| ZZZ3    | zinc finger ZZ-type containing 3          |
